# Supplementary material for: Yb(OTf)3 catalyzed [1,3]-rearrangement of 3-alkenyl oxindoles
Source: Royal Society of Chemistry journal article supplement (doi:10.1039/d0ob02032j), 2021-11-26
Supplement: d0ob02032j1.pdf [file d0ob02032j1.pdf]

## *Supporting Information*

### **Yb(OTf)<sub>3</sub> Catalyzed [1,3]-Rearrangement of 3-Alkenyl Oxindoles**

Chaofei Wu,<sup>†a</sup> Junlin Wan,<sup>†a</sup> Chao Song, Lingchen He,<sup>a</sup> Hongxin Liu,<sup>a</sup> Xinhua Li,<sup>a</sup> Juan Li,<sup>a</sup> Xin-Gen Hu,<sup>\*a</sup> Hong-Ping Xiao<sup>a</sup> and Jun Jiang<sup>\*a</sup>

*College of Chemistry and Materials Science, Wenzhou University, Wenzhou 325035, PR China.*

*E-mail: junjiang@wzu.edu.cn; hxgwzu@126.com*

### **Contents**

|                                                                  |    |
|------------------------------------------------------------------|----|
| 1. General Information.....                                      | 1  |
| 2. Preparation and Analytic Data of substrates <b>2a-n</b> ..... | 1  |
| 3. General Procedure for the rearrangement reaction .....        | 9  |
| 4. General Procedure for one-pot reaction .....                  | 10 |
| 5. General Procedure for derivative <b>6</b> .....               | 10 |
| 6. Analytical data for the products .....                        | 11 |
| 7. NMR spectra for substrates and products .....                 | 18 |
| 8. The HPLC of <b>2a</b> and <b>3a</b> .....                     | 47 |
| 9. X-ray Crystallographic Data for Product <b>3a</b> .....       | 49 |
| 10. X-ray Crystallographic Data for Product <b>6</b> .....       | 60 |

## 1. General Information

Chemicals were received from commercial sources without further purification or prepared by literature methods. Melting points are uncorrected and recorded on Digital Melting Point Apparatus WRS-1C. IR spectra were recorded on an NICOLETIS10 FI-Infrared Spectrophotometer. High-resolution mass spectrometry (HRMS) spectra were recorded on BRUKER micrOTOF-QII. X-ray crystallographic analysis was done at the X-ray crystallography facility.  $^1\text{H}$  NMR and  $^{13}\text{C}$  NMR spectra were measured on a 500 MHz Bruker spectrometer, using Acetone- $d_6$  or  $\text{CDCl}_3$  as the solvent with tetramethylsilane (TMS) as the internal standard at room temperature. Chemical shifts are given in  $\delta$  (ppm) relative to TMS, the coupling constants  $J$  are given in Hz.

## 2. Preparation and Analytic Data of substrates 2a-n:

### 2.1. General Procedure for the synthesis of Oxindoles:

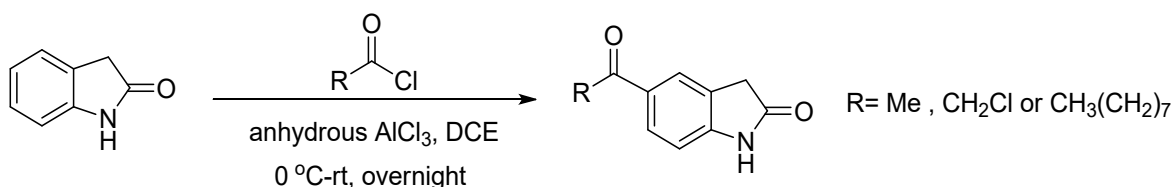

Anhydrous  $\text{AlCl}_3$  (3.0 equiv.) was suspended in DCE and then acyl chloride (2.0 equiv.) was added dropwise under ice bath. Then the mixture was stirred for 1 hour and 2-oxindole (1.0 equiv.) was added in several portions. The solution was then allowed to warm to r.t and stir overnight. After the reaction was completed, it was stopped by pour into crushed ice. Then the mixture was stirred vigorously for 10 minutes. The resulting precipitate was collected by vacuum filtration, washed with water and dried under vacuum to afford the title compound.

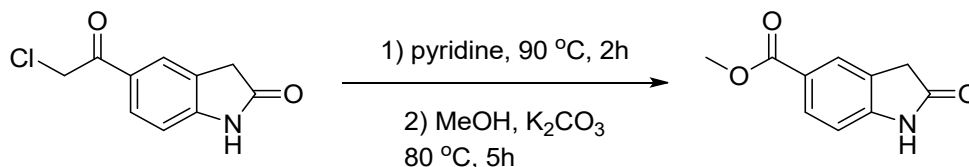

A solution of 5-(2-chloroacetyl) indolin-2-one (1.0 equiv) in pyridine was stirred at 90°C for 2h. After the reaction was completed, the mixture was cooled to room temperature and filtered precipitated solid. The solid was then washed with ethanol and dried under vacuo. The obtained compound was dissolved in MeOH, and  $\text{K}_2\text{CO}_3$  (0.2 equiv.) was added. The

mixture was stirred at 80°C for 5h. After cooling to room temperature, 4M HCl/dioxane was added until PH = 3 and the solvent was concentrated in vacuo. The crude product was triturated in water, filtered, washed with water and then dried under vacuo to get the product.

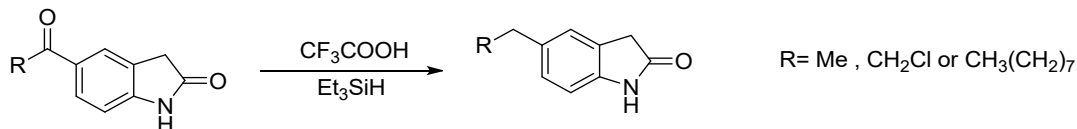

2-oxindole derivatives (10.0 mmol) was dissolved in 15 mL trifluoroacetic acid under ice bath then 2 mL triethylsilane was added dropwise to this solution. The mixture allowed to warm to r.t and stirred for 5h. Then 1 mL triethylsilane was added and the solution was stirred overnight. After the reaction was completed, the mixture was poured into ice water and the result precipitate was filtrated, washed with water, and dried under vacuum to get the product.

## 2.2. General Procedure for the synthesis of substrates 2a-n:

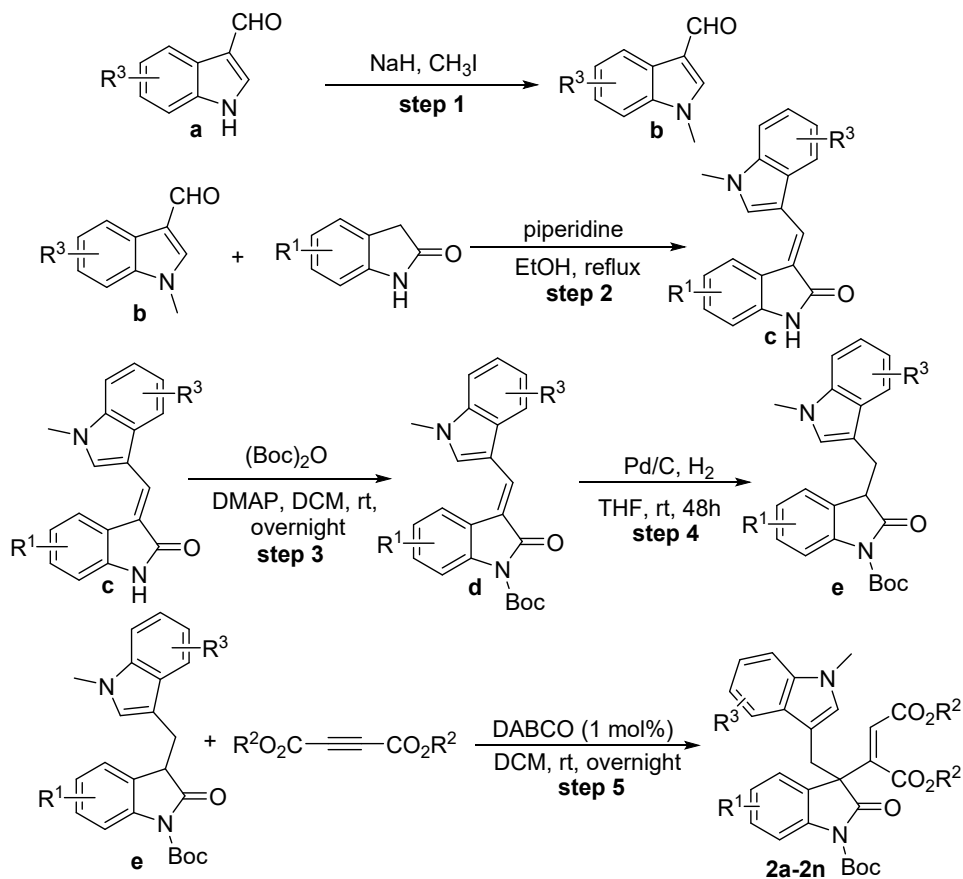

**Step 1:** 1H-indole-3-carbaldehyde **a** (3.0 g, 20.7 mmol) was treated with NaH (1.08 g, 26.9 mmol) in DMF (30 mL) at 0 °C for 15 min, and then iodomethane (1.7 mL, 26.9 mmol)

was added to the resulting mixture at room temperature. After being stirred at room temperature for 2 h, the reaction was quenched with H<sub>2</sub>O and extracted with ethyl acetate. Combined organic layers were washed with H<sub>2</sub>O and saturated brine, dried over anhydrous Na<sub>2</sub>SO<sub>4</sub>, and concentrated in vacuo. The residue was purified by flash chromatography on silica gel to give **b** (2.51g, 83%) as a colorless solid.

**Step 2:** A solution of aldehyde **b** (1 equiv.), 1,3-dihydro-indol-2-one (1 equiv.) and piperidine (1 equiv.) in EtOH is heated to reflux overnight. The crude mixture is allowed to come to room temperature, and then cooled in an ice bath. A precipitate is obtained which is filtered and washed with cold EtOH. If no precipitation occurs, the solvent is removed and the product is purified by flash chromatography. The title compound **c** was obtained as a yellow solid.

**Step 3:** Di-tert-butylidicarbonate (1.3 equiv.) was added in one portion to a solution of **c** (1 equiv.) and DMAP (1.3 equiv.) in DCM (20 mL). After completion of reaction (monitored by TLC), the reaction mixture was directly loaded onto by flash column chromatography (DCM) to afford the desired products **d**.

**Step 4:** Compound **d** (1 equiv.) was dissolved in THF and was allowed to react in the presence of Pd/C (0.8 mmol, 0.1 equiv.; 10 % loading in 50 % water) under a hydrogen atmosphere. After the starting material was consumed, the catalyst was removed via filtration through celite, followed by removal of the solvent by vacuum. The crude product was purified via flash chromatography on silica gel using hexanes/EtOAc. After the solvents were removed. Compound **e** was obtained as white solid.

**Step 5:** Compound **e** (1.0 equiv.) was dissolved in dichloromethane, then adding the corresponding alkyne ester (1.5 equiv.), DABCO (0.01 equiv.), stirring overnight at rt. After completion of reaction (monitored by TLC), the resulting crude product was purified through flash column chromatography (EtOAc : Petroleum ether= 1:5) to give the pure product **2a**.

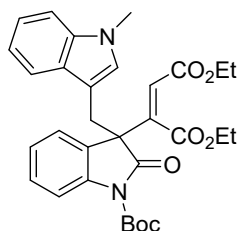

**Diethyl-2-(1-(tert-butoxycarbonyl)-3-((1-methylindolin-3-yl)methyl)-2-oxoindolin-3-yl) maleate **2a**:** White solid , m.p. 133 - 134 °C. <sup>1</sup>H NMR (500 MHz, CDCl<sub>3</sub>) δ 1.01 (t, *J* = 7.0 Hz, 3H), 1.30 (t, *J* = 7.0 Hz, 3H), 1.43 (s, 9H), 3.42 (d, *J* = 13.5 Hz, 1H), 3.54 (s,

3H), 3.72 (d,  $J = 13.5$  Hz, 1H), 3.99 - 4.02 (m, 2H), 4.22 (q,  $J = 7.0$  Hz, 2H), 6.36 (s, 1H), 6.51 (m, 1H), 6.93 - 6.96 (m, 1H), 7.06 - 7.12 (m, 3H), 7.16-7.19 (m, 1H), 7.27 - 7.32 (m, 2H), 7.52 - 7.54 (m, 1H);  $^{13}\text{C}$  NMR (125 MHz,  $\text{CDCl}_3$ )  $\delta$  13.4, 14.0, 27.8, 32.4, 33.0, 57.2, 61.1, 61.4, 83.9, 106.1, 108.6, 114.7, 118.8, 119.0, 121.3, 124.0, 124.1, 125.5, 127.9, 128.2, 128.5, 128.9, 136.2, 140.4, 146.5, 148.6, 164.7, 165.8, 170.0. IR (KBr): 2987, 1726, 1479, 1346, 1150, 841, 739  $\text{cm}^{-1}$ . HRMS (BRUKER micrOTOF-QII) calcd for  $\text{C}_{31}\text{H}_{34}\text{N}_2\text{O}_7$   $[\text{M}+\text{H}]^+$ : 547.2439, found 547.2454.

**Dimethyl-2-(1-(tert-butoxycarbonyl)-3-((1-methyl-1H-indol-3-yl)methyl)-2-**

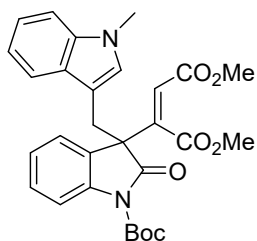

**oxoindolin-3-yl)maleate 2b:** White solid, m.p. 131.8 - 133.2  $^{\circ}\text{C}$ .  $^1\text{H}$  NMR (500 MHz,  $\text{CDCl}_3$ )  $\delta$  1.44 (s, 9H), 3.45 (d,  $J = 13.5$  Hz, 1H), 3.54 (s, 3H), 3.59 (s, 3H), 3.72 (d,  $J = 13.5$  Hz, 1H), 3.77 (s, 3H), 6.37 (s, 1H), 6.49 (s, 1H), 6.93-6.96 (m, 1H), 7.06 - 7.12 (m, 3H), 7.17 - 7.20 (m, 1H), 7.26 - 7.27 (m, 1H), 7.30 - 7.32 (m, 1H), 7.54 -

7.56 (m, 1H);  $^{13}\text{C}$  NMR (125 MHz,  $\text{CDCl}_3$ )  $\delta$  27.8, 32.5, 33.2, 52.1, 52.3, 57.2, 84.0, 106.1, 108.7, 114.8, 118.8, 119.0, 121.3, 123.5, 124.0, 124.4, 127.9, 128.0, 128.5, 129.0, 136.1, 140.3, 147.3, 148.6, 165.1, 166.6, 173.9. IR (KBr): 2994, 1729, 1479, 1344, 1148, 846, 735  $\text{cm}^{-1}$ . HRMS (BRUKER micrOTOF-QII) calcd for  $\text{C}_{29}\text{H}_{30}\text{N}_2\text{O}_7$   $[\text{M}+\text{H}]^+$ : 519.2126, found 519.2115.

**Diethyl-2-(1-(tert-butoxycarbonyl)-5-fluoro-3-((1-methylindolin-3-yl)methyl)-2-**

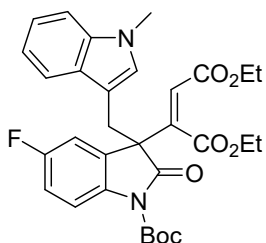

**oxoindolin-3-yl)maleate 2c:** Yellow solid, m.p. 106 - 107  $^{\circ}\text{C}$ .  $^1\text{H}$  NMR (500 MHz,  $\text{CDCl}_3$ )  $\delta$  1.06 (t,  $J = 7.0$  Hz, 3H), 1.31 (t,  $J = 7.0$  Hz, 3H), 1.43 (s, 9H), 3.41 (d,  $J = 13.5$  Hz, 1H), 3.57 (s, 3H), 3.72 (d,  $J = 13.5$  Hz, 1H), 4.03 - 4.06 (m, 2H), 4.23 (q,  $J = 7.0$  Hz, 2H), 6.42 (s, 1H), 6.52 (s, 1H), 6.84 - 6.88 (m, 1H), 6.96 - 6.99 (m, 1H),

7.02 - 7.04 (m, 1H), 7.07 - 7.14 (m, 2H), 7.32 - 7.34 (m, 1H), 7.50 - 7.53 (m, 1H);  $^{13}\text{C}$  NMR (125 MHz,  $\text{CDCl}_3$ )  $\delta$  13.5, 14.0, 27.8, 32.5, 33.1, 57.3, 61.3, 61.6, 84.1, 105.7, 108.8, 111.9 (d,  $J_{\text{C-F}} = 24.6$  Hz), 115.38 (d,  $J_{\text{C-F}} = 22.5$  Hz), 116.10 (d,  $J_{\text{C-F}} = 7.7$  Hz), 118.8, 119.0, 121.4, 124.7, 127.7, 128.5, 130.1 (d,  $J_{\text{C-F}} = 8.1$  Hz), 136.2, 136.4 (d,  $J_{\text{C-F}} = 2.3$  Hz), 145.5, 148.5, 158.5 (d,  $J_{\text{C-F}} = 242.5$  Hz), 164.6, 165.6, 173.7. IR (KBr): 2998, 1720, 1483, 1368, 1248, 1148, 829, 747  $\text{cm}^{-1}$ . HRMS (BRUKER micrOTOF-QII) calcd for  $\text{C}_{31}\text{H}_{33}\text{FN}_2\text{O}_7$   $[\text{M}+\text{H}]^+$ : 565.2345, found 565.2354.

**Diethyl-2-(1-(tert-butoxycarbonyl)-5-methyl-3-((1-methyl-1H-indol-3-yl)methyl)-2-oxoindolin-3-yl)maleate 2d:** White solid, m.p. 89.8 - 95.2 °C. <sup>1</sup>H

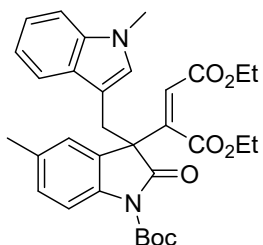

NMR (500 MHz, CDCl<sub>3</sub>) δ 1.03 (t, *J* = 7.0 Hz, 3H), 1.30 (t, *J* = 7.0 Hz, 3H), 1.44 (s, 9H), 2.28 (s, 3H), 3.42 (d, *J* = 13.5 Hz, 1H), 3.55 (s, 3H), 3.69 (d, *J* = 13.5 Hz, 1H), 3.98 - 4.07 (m, 2H), 4.22 (q, *J* = 7.0 Hz, 2H), 6.39 (s, 1H), 6.47 (s, 1H), 6.92 - 6.96 (m, 2H), 7.05 - 7.12 (m, 3H), 7.27 - 7.29 (m, 1H), 7.38 - 7.40 (m, 1H); <sup>13</sup>CNMR (125 MHz, CDCl<sub>3</sub>) δ 13.4, 14.0, 20.9, 27.8, 32.4, 32.9, 57.2, 61.1, 61.3, 83.7, 106.3, 108.6, 114.4, 118.6, 119.0, 121.2, 123.9, 125.1, 127.9, 128.0, 128.4, 129.3, 133.5, 136.2, 138.0, 146.7, 148.7, 164.7, 165.9, 174.1. IR (KBr): 3004, 1722, 1468, 1249, 1153, 824, 739 cm<sup>-1</sup>. HRMS (BRUKER micrOTOF-QII) calcd for C<sub>32</sub>H<sub>36</sub>N<sub>2</sub>O<sub>7</sub> [M+H]<sup>+</sup>: 561.2596, found 561.2610.

**Diethyl-2-(1-(tert-butoxycarbonyl)-5-ethyl-3-((1-methyl-1H-indol-3-yl)methyl)-2-oxoindolin-3-yl)maleate 2e:** Yellow solid. <sup>1</sup>H NMR (500 MHz,

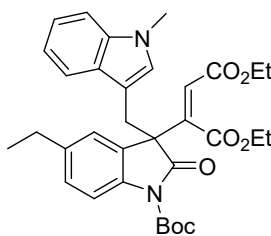

CDCl<sub>3</sub>) δ 7.40 (d, *J* = 8.5 Hz, 1H), 7.28 - 7.24 (m, 1H), 7.11 - 7.04 (m, 3H), 6.96 (dd, *J* = 8.5, 2.0 Hz, 1H), 6.91 (t, *J* = 7.5 Hz, 1H), 6.49 (s, 1H), 6.45 (s, 1H), 4.22 (q, *J* = 7.0 Hz, 2H), 4.06 - 3.95 (m, 2H), 3.68 (d, *J* = 13.5 Hz, 1H), 3.55 (s, 3H), 3.45 (d, *J* = 13.5 Hz, 1H), 2.62 - 2.53 (m, 2H), 1.46 (s, 9H), 1.30 (t, *J* = 7.0 Hz, 3H), 1.17 (t, *J* = 7.5 Hz, 3H), 1.01 (t, *J* = 7.0 Hz, 3H). <sup>13</sup>C NMR (125 MHz, CDCl<sub>3</sub>) δ 13.4, 14.0, 15.7, 27.8, 28.4, 32.4, 32.9, 57.3, 61.1, 61.3, 83.7, 106.4, 108.6, 114.5, 118.7, 119.0, 121.2, 123.8, 124.1, 127.9, 128.0, 128.2, 128.5, 136.1, 138.1, 140.1, 146.8, 148.7, 164.7, 165.9, 174.2. HRMS (BRUKER micrOTOF-QII) calcd for C<sub>33</sub>H<sub>38</sub>N<sub>2</sub>O<sub>7</sub> [M+H]<sup>+</sup>: 575.2752, found 575.2746.

**Diethyl-2-(1-(tert-butoxycarbonyl)-3-((1-methyl-1H-indol-3-yl)methyl)-5-nonyl-2-oxoindolin-3-yl)maleate 2f:** Yellow oil. <sup>1</sup>H NMR (500 MHz,

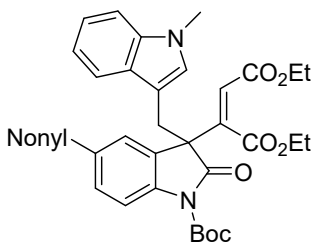

CDCl<sub>3</sub>) δ 7.40 (d, *J* = 8.0 Hz, 1H), 7.27 (d, *J* = 8.0 Hz, 1H), 7.13 - 7.09 (m, 1H), 7.08 - 7.04 (m, 2H), 6.96 - 6.90 (m, 2H), 6.49 (s, 1H), 6.42 (s, 1H), 4.22 (q, *J* = 7.0 Hz, 2H), 4.04 - 3.95 (m, 2H), 3.69 (d, *J* = 13.5 Hz, 1H), 3.55 (s, 3H), 3.44 (d, *J* = 13.5 Hz, 1H), 2.58 - 2.47 (m, 2H), 1.45 (s, 9H), 1.33 - 1.23 (m, 17H), 1.01 (t, *J* = 7.0 Hz, 3H), 0.92 - 0.86 (m, 3H). <sup>13</sup>C NMR (125 MHz, CDCl<sub>3</sub>) δ 13.5, 14.0, 14.0, 22.6, 27.8, 29.3, 29.3, 29.5, 29.6, 31.6, 31.9, 32.4, 32.8, 35.5, 57.3, 61.1, 61.3, 83.7, 106.3, 108.6, 114.4, 118.8, 119.0,

121.2, 123.9, 124.5, 127.9, 127.9, 128.5, 128.7, 136.1, 138.1, 138.8, 146.8, 148.7, 164.7, 165.9, 174.2. HRMS (BRUKER micrOTOF-QII) calcd for C<sub>40</sub>H<sub>52</sub>N<sub>2</sub>O<sub>7</sub> [M+H]<sup>+</sup>: 673.3848, found 673.3856.

**Diethyl 2-(1-(tert-butoxycarbonyl)-5-(2-chloroethyl)-3-((1-methyl-1H-indol-3-yl)**

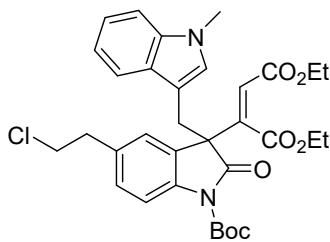

**methyl)-2-oxoindolin-3-yl)maleate 2g:** Yellow solid. <sup>1</sup>H NMR (500 MHz, CDCl<sub>3</sub>) δ 7.48 (d, *J* = 8.5 Hz, 1H), 7.28 (d, *J* = 8.0 Hz, 1H), 7.13 - 7.10 (m, 1H), 7.09 - 7.04 (m, 2H), 7.02 - 6.98 (m, 1H), 6.97 - 6.90 (m, 1H), 6.50 (s, 1H), 6.46 (s, 1H), 4.22 (q, *J* = 7.0 Hz, 2H), 4.06 - 3.94 (m, 2H), 3.68 (d, *J* = 13.5

Hz, 1H), 3.63 - 3.56 (m, 2H), 3.54 (s, 3H), 3.44 (d, *J* = 13.5 Hz, 1H), 2.97 (t, *J* = 7.0 Hz, 2H), 1.45 (s, 9H), 1.30 (t, *J* = 7.0 Hz, 3H), 1.01 (t, *J* = 7.0 Hz, 3H). <sup>13</sup>C NMR (125 MHz, CDCl<sub>3</sub>) δ 13.5, 14.0, 27.8, 32.4, 32.9, 38.4, 45.0, 57.2, 61.1, 61.4, 83.9, 106.1, 108.7, 114.7, 118.8, 118.9, 121.3, 124.2, 125.0, 127.9, 128.4, 128.7, 129.4, 133.9, 136.1, 139.2, 146.4, 148.6, 164.7, 165.8, 174.0. HRMS (BRUKER micrOTOF-QII) calcd for C<sub>33</sub>H<sub>37</sub>ClN<sub>2</sub>O<sub>7</sub> [M+H]<sup>+</sup>: 609.2362, found 609.2359.

**1-(tert-butyl) 5-methyl (Z)-3-(1,4-diethoxy-1,4-dioxobut-2-en-2-yl)-3-((1-methyl-1H-indol-3-yl)methyl)-2-oxoindoline-1,5-dicarboxylate 2h:**

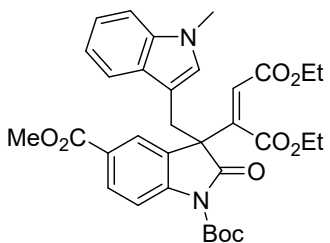

Yellow solid. <sup>1</sup>H NMR (500 MHz, CDCl<sub>3</sub>) δ 7.98 (d, *J* = 1.9 Hz, 1H), 7.90 (dd, *J* = 8.5, 2.0 Hz, 1H), 7.59 (d, *J* = 8.5 Hz, 1H), 7.31 (d, *J* = 8.0 Hz, 1H), 7.12 - 7.04 (m, 2H), 6.95 - 6.91 (m, 1H), 6.58 (s, 1H), 6.30 (s, 1H), 4.24 (q, *J* = 7.0 Hz, 2H),

4.06 - 3.97 (m, 2H), 3.93 (s, 3H), 3.76 (d, *J* = 13.5 Hz, 1H), 3.52 (s, 3H), 3.44 (d, *J* = 13.5 Hz, 1H), 1.42 (s, 9H), 1.31 (t, *J* = 7.0 Hz, 3H), 1.03 (t, *J* = 7.0 Hz, 3H). <sup>13</sup>C NMR (126 MHz, CDCl<sub>3</sub>) δ 13.4, 14.0, 27.7, 32.4, 33.1, 52.1, 56.9, 61.2, 61.5, 84.4, 105.6, 108.7, 114.4, 118.9, 119.0, 121.4, 125.0, 125.5, 125.9, 127.6, 128.4, 128.7, 131.0, 136.2, 144.4, 145.1, 148.3, 164.7, 165.5, 166.3, 173.8. HRMS (BRUKER micrOTOF-QII) calcd for C<sub>33</sub>H<sub>36</sub>N<sub>2</sub>O<sub>9</sub> [M+H]<sup>+</sup>: 605.2494, found 605.2490.

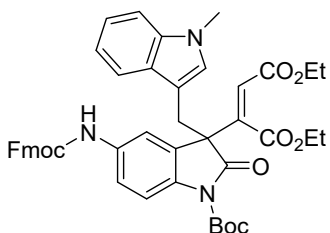

**Diethyl 2-(5-(((9H-fluoren-9-yl)methoxy)carbonyl)amino)-1-(tert-butoxycarbonyl)-3-((1-methyl-1H-indol-3-yl)methyl)-2-oxoindolin-3-yl)maleate 2i:** Yellow solid. <sup>1</sup>H NMR (500 MHz, CDCl<sub>3</sub>) δ

7.80 (d,  $J = 7.5$  Hz, 2H), 7.64 (d,  $J = 7.5$  Hz, 2H), 7.48 - 7.40 (m, 4H), 7.38 - 7.32 (m, 3H), 7.13 - 7.02 (m, 3H), 6.96 - 6.90 (m, 1H), 6.66 (br, 1H), 6.49 (s, 1H), 6.43 (s, 1H), 4.56 (d,  $J = 6.5$  Hz, 2H), 4.29 (t,  $J = 6.5$  Hz, 1H), 4.22 (q,  $J = 7.0$  Hz, 2H), 4.08 - 3.97 (m, 2H), 3.71 (d,  $J = 13.5$  Hz, 1H), 3.53 (s, 3H), 3.41 (d,  $J = 13.5$  Hz, 1H), 1.42 (s, 9H), 1.29 (t,  $J = 7.0$  Hz, 3H), 1.03 (t,  $J = 7.0$  Hz, 3H).  $^{13}\text{C}$  NMR (125 MHz,  $\text{CDCl}_3$ )  $\delta$  13.5, 14.0, 27.8, 32.4, 33.0, 47.1, 57.4, 61.1, 61.5, 66.9, 83.9, 105.9, 108.7, 115.2, 118.8, 119.1, 120.1, 121.3, 124.4, 124.9, 127.1, 127.8, 128.7, 129.1, 134.1, 136.2, 141.4, 143.7, 146.0, 148.6, 153.3, 164.7, 165.7, 173.9. HRMS (BRUKER micrOTOF-QII) calcd for  $\text{C}_{46}\text{H}_{45}\text{N}_3\text{O}_9$   $[\text{M}+\text{H}]^+$ : 784.3229, found 784.3215.

**Diethyl-2-(1-(tert-butoxycarbonyl)-5-methoxy-3-((1-methyl-1H-indol-3-yl)methyl)-2-**

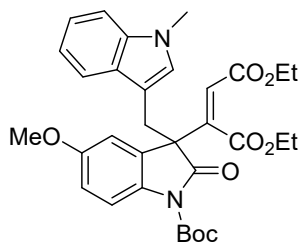

**oxoindolin-3-yl)maleate 2j:** White solid, m.p. 85.9 - 87.7 °C.  $^1\text{H}$  NMR (500 MHz,  $\text{CDCl}_3$ )  $\delta$  1.05 (t,  $J = 7.0$  Hz, 3H), 1.30 (t,  $J = 7.0$  Hz, 3H), 1.44 (s, 9H), 3.43 (d,  $J = 13.5$  Hz, 1H), 3.55 (s, 3H), 3.67 - 3.69 (m, 4H), 4.02 - 4.06 (m, 2H), 4.22 (q,  $J = 7.0$  Hz, 2H), 6.45 (s, 1H), 6.48 (s, 1H), 6.68 - 6.70 (m, 2H), 6.79 (d,  $J = 2.5$

Hz, 1H), 6.93 - 6.96 (m, 1H), 7.06 - 7.12 (m, 2H), 7.31 (d,  $J = 8.0$  Hz, 1H), 7.47 (d,  $J = 8.5$  Hz, 1H);  $^{13}\text{C}$  NMR (125 MHz,  $\text{CDCl}_3$ )  $\delta$  13.5, 14.0, 27.8, 32.4, 32.9, 55.6, 57.4, 61.1, 61.4, 83.7, 106.2, 108.7, 110.6, 114.3, 115.6, 118.8, 119.0, 121.3, 124.1, 128.0, 128.4, 129.2, 133.7, 136.2, 146.5, 148.7, 156.5, 164.7, 165.8, 174.0. IR (KBr): 2989, 1725, 1488, 1342, 1247, 1155, 1011, 862, 742  $\text{cm}^{-1}$ . HRMS (BRUKER micrOTOF-QII) calcd for  $\text{C}_{32}\text{H}_{36}\text{N}_2\text{O}_8$   $[\text{M}+\text{H}]^+$ : 577.2545, found 577.2538.

**Diethyl-2-(1-(tert-butoxycarbonyl)-3-((4-methoxy-1-methylindolin-3-yl)methyl)-2-**

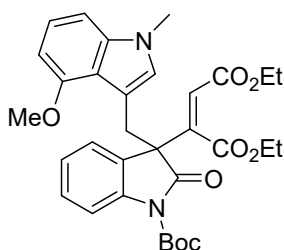

**oxoindolin-3-yl)maleate 2k:** White solid, m.p. 135.8 - 145.2 °C.  $^1\text{H}$  NMR (500 MHz,  $\text{CDCl}_3$ )  $\delta$  1.00 (t,  $J = 7.0$  Hz, 3H), 1.29 (t,  $J = 7.0$  Hz, 3H), 1.57 (s, 9H), 3.56 (s, 3H), 3.75 (s, 3H), 3.84 (d,  $J = 13.5$  Hz, 1H), 3.91 - 4.00 (m, 3H), 4.19 - 4.23 (m, 2H), 6.28 (d,  $J = 7.5$  Hz, 1H), 6.46 (s, 1H), 6.54 (s, 1H), 6.73 (d,  $J = 8.0$  Hz, 1H),

6.91 (d,  $J = 8.0$  Hz, 1H), 6.96 (d,  $J = 8.0$  Hz, 1H), 7.09 (t,  $J = 8.0$  Hz, 1H), 7.13 (t,  $J = 7.5$  Hz, 1H), 7.54 (d,  $J = 8.0$  Hz, 1H);  $^{13}\text{C}$  NMR (125 MHz,  $\text{CDCl}_3$ )  $\delta$  13.5, 14.0, 28.0, 32.7, 32.9, 54.6, 57.8, 61.0, 61.2, 83.9, 99.0, 102.2, 106.8, 114.1, 117.9, 122.0, 123.2, 123.7, 125.6, 126.8, 127.6, 128.5, 137.7, 139.9, 147.2, 148.9, 154.4, 164.8, 166.0, 174.3. IR



(KBr): 3004, 1722, 1468, 1249, 1153, 824, 739  $\text{cm}^{-1}$ . HRMS (BRUKER micrOTOF-QII) calcd for  $\text{C}_{32}\text{H}_{36}\text{N}_2\text{O}_8$   $[\text{M}+\text{H}]^+$ : 577.2545, found 577.2553.

**Diethyl-2-(1-(tert-butoxycarbonyl)-3-((1,6-dimethyl-1H-indol-3-yl)methyl)-2-**

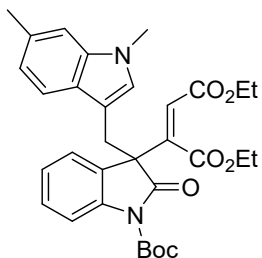

**oxoindolin-3-yl) maleate 2l:** White solid, m.p. 104.4 - 107.0  $^{\circ}\text{C}$ .  $^1\text{H}$  NMR (500 MHz,  $\text{CDCl}_3$ )  $\delta$  1.01 (t,  $J = 7.0$  Hz, 3H), 1.30 (t,  $J = 7.0$  Hz, 3H), 1.46 (s, 9H), 2.62 (s, 3H), 3.40 (d,  $J = 14.0$  Hz, 1H), 3.68 (d,  $J = 14.0$  Hz, 1H), 3.79 (s, 3H), 3.98 - 4.02 (m, 2H), 4.22 (q,  $J = 7.0$  Hz, 2H), 6.23 (s, 1H), 6.50 (s, 1H), 6.74 - 6.81 (m, 2H), 7.09 (t,  $J = 7.5$  Hz, 1H), 7.14 (d,  $J = 7.5$  Hz, 1H), 7.17 - 7.20 (m, 1H), 7.26 - 7.28 (m, 1H), 7.58 (d,  $J = 8.0$  Hz, 1H);  $^{13}\text{C}$  NMR (125 MHz,  $\text{CDCl}_3$ )  $\delta$  13.5, 14.0, 19.5, 26.9, 27.8, 32.8, 36.4, 51.1, 61.1, 61.4, 83.9, 105.9, 114.7, 117.1, 119.1, 120.5, 124.0, 124.1, 124.5, 128.2, 128.9, 129.1, 130.1, 134.9, 140.5, 146.7, 148.7, 164.7, 165.8, 174.0. IR (KBr): 2976, 1731, 1464, 1346, 1250, 1151, 1028, 876, 745  $\text{cm}^{-1}$ . HRMS calcd for  $\text{C}_{32}\text{H}_{36}\text{N}_2\text{O}_7$   $[\text{M}+\text{H}]^+$ : 561.2596, found 561.2600.

**Diethyl-2-(1-(tert-butoxycarbonyl)-3-((5-methoxy-1-methylindolin-3-yl)methyl)-2-**

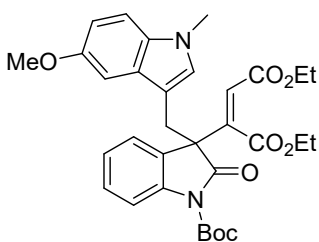

**oxoindolin-3-yl)maleate 2m:** Yellow liquid.  $^1\text{H}$  NMR (500 MHz,  $\text{CDCl}_3$ )  $\delta$  1.19 (t,  $J = 7.0$  Hz, 3H), 1.42 (t,  $J = 7.0$  Hz, 3H), 3.25 (dd,  $J_1 = 9.0$  Hz,  $J_2 = 14.5$  Hz, 1H), 3.59 (dd,  $J_1 = 9.0$  Hz,  $J_2 = 14.5$  Hz, 1H), 3.65 (s, 3H), 3.81 (s, 3H), 4.11 - 4.23 (m, 2H), 4.23-4.50 (m, 2H), 4.54 (dd,  $J_1 = 5.0$  Hz,  $J_2 = 9.0$  Hz, 1H), 6.84 - 6.89 (m, 3H), 6.94 (s, 1H), 7.04 (d,  $J = 2.0$  Hz, 1H), 7.14 (d,  $J = 10.5$  Hz, 1H), 7.21 (t,  $J = 8.0$  Hz, 1H), 7.49 (d,  $J = 8.0$  Hz, 1H), 9.44 (s, 1H);  $^{13}\text{C}$  NMR (125 MHz,  $\text{CDCl}_3$ )  $\delta$  12.9, 12.9, 25.1, 31.7, 47.6, 54.8, 60.5, 60.7, 99.1, 108.9, 109.0, 109.3, 111.0, 120.0, 120.9, 123.3, 126.8, 127.3, 129.3, 131.1, 139.4, 141.2, 152.9, 166.0, 166.9, 169.4. IR (KBr): 3001, 1723, 1494, 1348, 1253, 1150, 1035, 879, 753  $\text{cm}^{-1}$ . HRMS (BRUKER micrOTOF-QII) calcd for  $\text{C}_{32}\text{H}_{36}\text{N}_2\text{O}_8$   $[\text{M}+\text{H}]^+$ : 577.2545, found 577.2527.

**Diethyl-2-(1-(tert-butoxycarbonyl)-3-((1,7-dimethyl-1H-indol-3-yl)methyl)-2-**

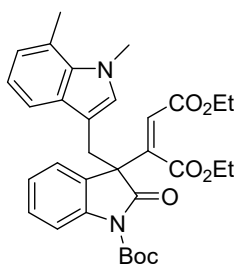

**oxoindolin-3-yl)maleate 2n:** White solid, m.p. 88.2 - 89.0  $^{\circ}\text{C}$ .  $^1\text{H}$  NMR (500 MHz,  $\text{CDCl}_3$ )  $\delta$  1.01 (t,  $J = 7.0$  Hz, 3H), 1.30 (t,  $J = 7.0$  Hz, 3H), 1.44 (s, 9H), 2.39 (s, 3H), 3.40 (d,  $J = 13.5$  Hz, 1H), 3.49 (s, 3H), 3.70 (d,  $J = 13.5$  Hz, 1H), 3.96 - 4.04 (m, 2H), 4.22 (q,  $J = 7.0$

Hz, 2H), 6.27 (s, 1H), 6.50 (s, 1H), 6.77 (dd,  $J_1 = 1.0$  Hz,  $J_2 = 7.5$  Hz, 1H), 7.16 - 7.20 (m, 2H), 7.54 (d,  $J = 8.0$  Hz, 1H);  $^{13}\text{C}$  NMR (125 MHz,  $\text{CDCl}_3$ )  $\delta$  13.5, 14.0, 21.7, 27.8, 32.3, 33.1, 57.2, 61.1, 61.4, 83.8, 106.0, 108.6, 114.7, 118.7, 120.7, 124.0, 124.1, 124.5, 125.8, 127.9, 128.2, 128.9, 131.0, 136.6, 140.5, 146.6, 148.7, 164.7, 165.8, 174.0. IR (KBr): 2991, 1711, 1467, 1346, 1289, 1152, 1035, 863, 754  $\text{cm}^{-1}$ . HRMS (BRUKER micrOTOF-QII) calcd for  $\text{C}_{32}\text{H}_{36}\text{N}_2\text{O}_7$   $[\text{M}+\text{H}]^+$ : 561.2596, found 561.2614.

### 3. General Procedure for the rearrangement reaction

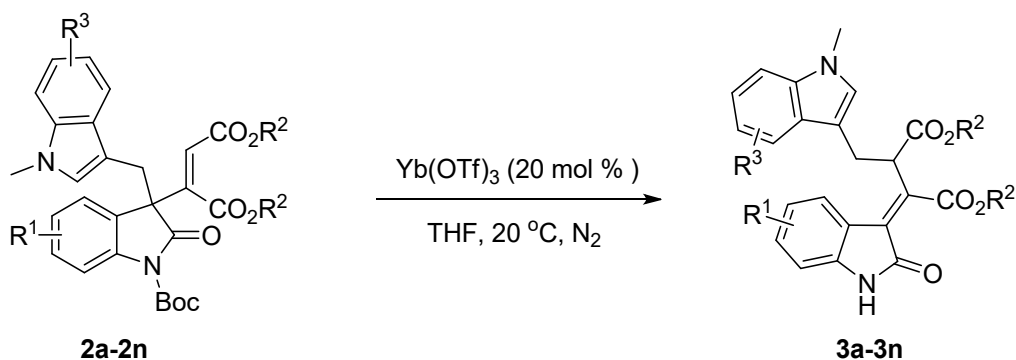

**2a-2n** (0.1 mmol), catalyst (20 mol%) and THF (1 mL) was added to a sealed tube under  $\text{N}_2$  atmosphere, then the reaction system was stirred at 20 °C. After completion of reaction (monitored by TLC), the reaction mixture was purified through flash column chromatography on a silica gel (eluent: petroleum ether: ethyl acetate= 4/1-2/1) to give the targeting products.

### 4. General Procedure for one-pot reaction

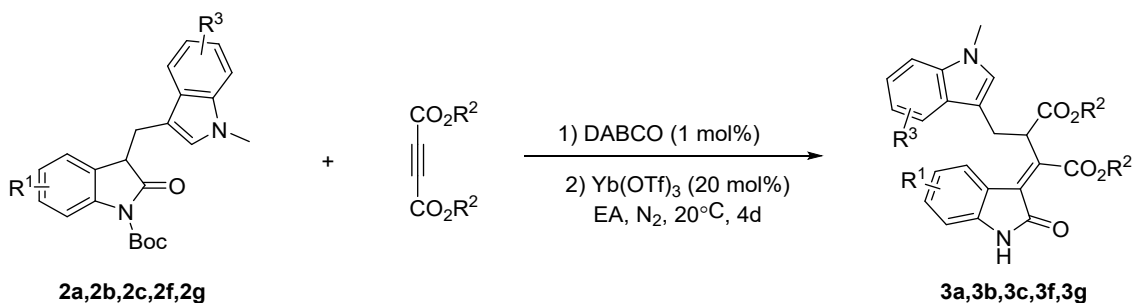

Compound **2** (0.1 mmol), DABCO (1 mol%) were added to a tube. After the sealed tube was evacuated and refilled with  $\text{N}_2$  three times, the corresponding alkyne ester (1.5 equiv.) and EtOAc (1 mL) was added and the reaction system was stirred at 20 °C. After completion of reaction (monitored by TLC), then the  $\text{Yb}(\text{OTf})_3$  (20 mol%) was added under  $\text{N}_2$  atmosphere and the resulting mixture was stirred for 3 days at 20 °C (monitored

by TLC). The reaction mixture was purified through flash column chromatography on a silica gel (eluent: petroleum ether: ethyl acetate= 4/1-2/1) to yield the targeting products.

### 5. General Procedure for derivative 6

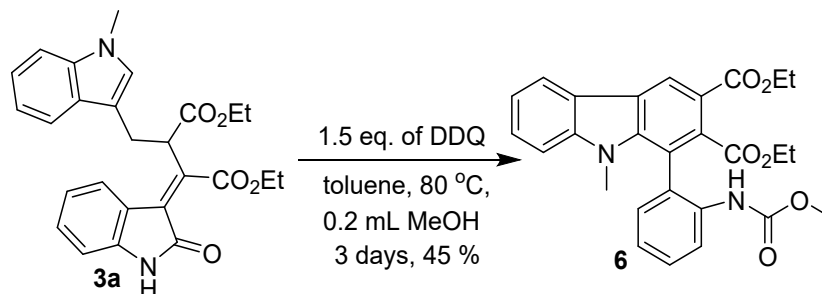

**3a** (0.1 mmol) and DDQ (0.15 mmol) was dissolved in solvent (Toluene: Methanol = 5:1, 1.0 mL). The resulting mixture was stirred for 3 days at 80 °C. After completion of reaction, the reaction mixture was purified through flash column chromatography on a silica gel (petroleum ether: ethyl acetate = 8/1 - 4/1) to yield the targeting product **6** (white solid, 45% yield).

### 6. Analytical data for the products

#### Diethyl-(*Z*)-2-((1-methyl-1*H*-indol-3-yl)methyl)-3-(2-oxoindolin-3-ylidene)succinate

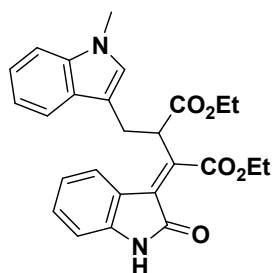

**3a**: Yellow solid (37.5 mg, 72% yield), m.p. 150 - 151 °C. <sup>1</sup>H NMR (500 MHz, CDCl<sub>3</sub>) δ 1.17 (t, *J* = 7.0 Hz, 3H), 1.40 (t, *J* = 7.0 Hz, 3H), 3.26 (dd, *J*<sub>1</sub> = 5.5 Hz, *J*<sub>2</sub> = 15.0 Hz, 1H), 3.60 (dd, *J*<sub>1</sub> = 9.0 Hz, *J*<sub>2</sub> = 15.0 Hz, 1H), 3.68 (s, 3H), 4.13 - 4.16 (m, 2H), 4.43 - 4.46 (m, 2H), 4.52 (dd, *J*<sub>1</sub> = 5.5 Hz, *J*<sub>2</sub> = 9.0 Hz, 1H), 6.96(s, 1H), 7.12 (t, *J* = 7.0 Hz, 1H), 7.18-7.25 (m, 2H), 7.46 (t, *J* = 8.0 Hz, 1H), 7.60 (t, *J* = 8.0 Hz, 1H), 8.66 (s, 1H); <sup>13</sup>C NMR (125 MHz, CDCl<sub>3</sub>) δ 13.9, 14.0, 26.0, 32.6, 48.7, 61.5, 61.7, 109.2, 110.1, 110.4, 118.5, 119.0, 121.1, 121.6, 122.1, 124.6, 127.2, 127.7, 127.8, 130.3, 136.9, 140.5, 141.9, 167.0, 167.5, 170.3. IR (KBr): 3139, 2959, 1708, 1617, 1467, 1337, 1182, 1014, 856, 745 cm<sup>-1</sup>. HRMS (BRUKER micrOTOF-QII) calcd for C<sub>26</sub>H<sub>26</sub>N<sub>2</sub>O<sub>5</sub> [M+H]<sup>+</sup>: 447.1915, found 447.1919.

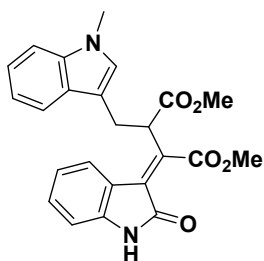

**Dimethyl-(*Z*)-2-((1-methyl-1*H*-indol-3-yl)methyl)-3-(2-oxoindolin-3-ylidene) succinate **3b****: Yellow solid (35.9 mg, 86% yield), m.p. 171-172 °C. <sup>1</sup>H NMR (500 MHz, CDCl<sub>3</sub>) δ 3.26 (dd, *J*<sub>1</sub> = 5.5 Hz, *J*<sub>2</sub> = 15.0 Hz, 1H), 3.60 (dd, *J*<sub>1</sub> = 9.0 Hz, *J*<sub>2</sub> = 15.0 Hz,

1H), 3.68 (s, 6H), 3.96 (s, 3H), 4.54 (dd,  $J_1 = 5.5$  Hz,  $J_2 = 9.0$  Hz, 1H), 6.80 - 6.83 (m, 2H), 6.95 (s, 1H), 7.12 (t,  $J = 7.0$  Hz, 1H), 7.21 (dd,  $J_1 = 7.0$  Hz,  $J_2 = 15.0$  Hz, 2H), 7.25 (s, 1H), 7.41 (d,  $J = 8.0$  Hz, 1H), 7.60 (d,  $J = 8.0$  Hz, 1H), 8.54 (s, 1H);  $^{13}\text{C}$  NMR (125 MHz,  $\text{CDCl}_3$ )  $\delta$  26.0, 32.6, 48.6, 52.5, 52.7, 109.3, 110.2, 110.3, 118.4, 119.0, 120.9, 121.6, 122.2, 124.5, 127.5, 127.6, 127.8, 130.4, 136.9, 139.9, 141.9, 167.4, 167.6, 170.8. IR (KBr): 3381, 2948, 1719, 1615, 1435, 1324, 1253, 1175, 1097, 831, 754, 673  $\text{cm}^{-1}$ . HRMS (BRUKER micrOTOF-QII) calcd for  $\text{C}_{24}\text{H}_{22}\text{N}_2\text{O}_5$   $[\text{M}+\text{H}]^+$ : 419.1602, found 419.1602.

**Diethyl-(Z)-2-(5-fluoro-2-oxindolin-3-ylidene)-3-((1-methyl-1H-indol-3-yl)methyl) succinate 3c:**

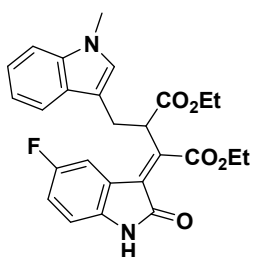

Yellow solid (39.4 mg, 85% yield), m.p. 51.7 - 52.0  $^{\circ}\text{C}$ .  $^1\text{H}$  NMR (500 MHz,  $\text{CDCl}_3$ )  $\delta$  1.18 (t,  $J = 7.0$  Hz, 3H), 1.40 (t,  $J = 7.0$  Hz, 3H), 3.28 (dd,  $J_1 = 6.0$  Hz,  $J_2 = 15.0$  Hz, 1H), 3.59 (dd,  $J_1 = 8.5$  Hz,  $J_2 = 15.0$  Hz, 1H), 3.69 (s, 3H), 4.11 - 4.18 (m, 2H), 4.38 (dd,  $J_1 = 6.0$  Hz,  $J_2 = 8.5$  Hz, 1H), 4.40 - 4.47 (m, 2H), 6.73 (dd,  $J_1 = 4.5$  Hz,  $J_2 = 8.5$  Hz, 1H), 6.91 (dt,  $J_1 = 2.5$  Hz,  $J_2 = 8.5$  Hz, 1H), 6.96 (s, 1H), 7.11 - 7.14 (m, 1H), 7.18 (dd,  $J_1 = 2.0$  Hz,  $J_2 = 9.0$  Hz, 1H), 7.20 - 7.25 (m, 2H), 7.61 (d,  $J = 8.0$  Hz, 1H), 8.78 (s, 1H);  $^{13}\text{C}$  NMR (125 MHz,  $\text{CDCl}_3$ )  $\delta$  12.9, 12.9, 25.1, 31.5, 47.8, 60.6, 60.8, 108.2, 109.2, 109.4 (d,  $J_{\text{C-F}} = 8.0$  Hz), 111.1 (d,  $J_{\text{C-F}} = 26.2$  Hz), 115.6 (d,  $J_{\text{C-F}} = 23.6$  Hz), 117.3, 118.1, 120.7, 120.9 (d,  $J_{\text{C-F}} = 8.6$  Hz), 126.1 (d,  $J_{\text{C-F}} = 2.7$  Hz), 126.6, 126.8, 135.8, 136.8, 140.8, 157.4 (d,  $J_{\text{C-F}} = 238.1$  Hz), 165.6, 166.5, 169.0. IR (KBr): 3364, 2927, 1725, 1479, 1177, 1017, 859, 742  $\text{cm}^{-1}$ . HRMS (BRUKER micrOTOF-QII) calcd for  $\text{C}_{26}\text{H}_{25}\text{FN}_2\text{O}_5$   $[\text{M}+\text{H}]^+$ : 465.1821, found 465.1821.

**Diethyl-(Z)-2-((1-methyl-1H-indol-3-yl)methyl)-3-(5-methyl-2-oxindolin-3-ylidene) succinate 3d:**

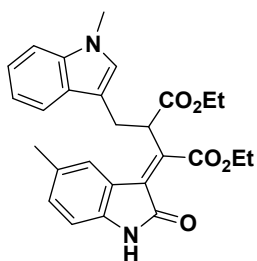

Yellow solid (35.4 mg, 77% yield), m.p. 163.0 - 164.0  $^{\circ}\text{C}$ .  $^1\text{H}$  NMR (500 MHz,  $\text{CDCl}_3$ )  $\delta$  1.20 (t,  $J = 7.0$  Hz, 3H), 1.40 (t,  $J = 7.0$  Hz, 3H), 2.08 (s, 3H), 3.25 (dd,  $J_1 = 6.0$  Hz,  $J_2 = 14.5$  Hz, 1H), 3.61 (dd,  $J_1 = 8.5$  Hz,  $J_2 = 14.5$  Hz, 1H), 3.66 (s, 3H), 4.11 - 4.20 (m, 2H), 4.41 - 4.45 (m, 2H), 4.49 (dd,  $J_1 = 6.0$  Hz,  $J_2 = 8.5$  Hz, 1H), 6.68 (d,  $J = 8.0$  Hz, 1H), 6.95 (s, 1H), 6.98 (d,  $J = 8.0$  Hz, 1H), 7.11 - 7.14 (m, 1H), 7.16 (s, 1H), 7.20 - 7.23 (m, 1H), 7.24 - 7.25 (m, 1H), 7.64 (d,  $J = 8.0$  Hz, 1H), 8.62 (s, 1H);  $^{13}\text{C}$  NMR (125 MHz,  $\text{CDCl}_3$ )  $\delta$  13.9, 14.0, 20.9, 23.1, 32.5, 48.8, 61.5, 61.7, 109.3, 109.8, 110.3, 118.3, 119.0, 121.1, 121.6, 125.1, 127.4, 127.7, 128.1, 130.7, 131.5, 136.8, 139.6,

140.2, 167.1, 167.8, 170.5. IR (KBr): 3325, 2931, 1724, 1618, 1485, 1371, 1230, 1098, 1017, 809, 741  $\text{cm}^{-1}$ . HRMS (BRUKER micrOTOF-QII) calc d for  $\text{C}_{27}\text{H}_{28}\text{N}_2\text{O}_5$   $[\text{M}+\text{H}]^+$ : 461.2071, found 461.2090.

**Diethyl-(Z)-2-(5-ethyl-2-oxoindolin-3-ylidene)-3-((1-methyl-1H-indol-3-yl)methyl)succinate 3e:**

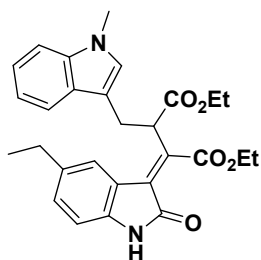

**succinate 3e:** Yellow oil (35.2 mg, 74% yield).  $^1\text{H}$  NMR (500 MHz,  $\text{CDCl}_3$ )  $\delta$  8.64 (s, 1H), 7.63 (d,  $J = 7.9$  Hz, 1H), 7.27 - 7.19 (m, 3H), 7.14 - 7.08 (m, 1H), 7.05 - 7.01 (m, 1H), 6.96 (s, 1H), 6.72 (d,  $J = 7.9$  Hz, 1H), 4.56 - 4.51 (m, 1H), 4.48 - 4.36 (m, 2H), 4.21 - 4.09 (m, 2H), 3.67 (s, 3H), 3.64 - 3.56 (m, 1H), 3.25 (dd,  $J_1 = 14.5$  Hz,  $J_2 = 6.0$  Hz, 1H), 2.39 (q,  $J = 7.5$  Hz, 2H), 1.39 (t,  $J = 7.0$  Hz, 3H), 1.18 (t,  $J = 7.0$  Hz, 3H), 1.08 (t,  $J = 7.5$  Hz, 3H).  $^{13}\text{C}$  NMR (125 MHz,  $\text{CDCl}_3$ )  $\delta$  13.9, 14.0, 15.9, 26.0, 28.4, 32.5, 48.7, 61.5, 61.7, 109.3, 109.9, 110.3, 118.3, 119.0, 121.2, 121.6, 124.1, 127.5, 127.7, 128.1, 129.6, 136.8, 138.2, 139.8, 140.2, 167.1, 167.7, 170.4. HRMS (BRUKER micrOTOF-QII) calc d for  $\text{C}_{28}\text{H}_{30}\text{N}_2\text{O}_5$   $[\text{M}+\text{H}]^+$ : 475.2228, found 475.2219.

**Diethyl-(Z)-2-((1-methyl-1H-indol-3-yl)methyl)-3-(5-nonyl-2-oxoindolin-3-ylidene)succinate 3f:**

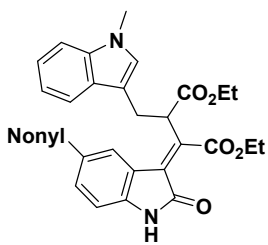

**succinate 3f:** Yellow oil (43.6 mg, 76% yield).  $^1\text{H}$  NMR (500 MHz,  $\text{CDCl}_3$ )  $\delta$  8.29 (s, 1H), 7.62 (d,  $J = 7.8$  Hz, 1H), 7.28 - 7.24 (m, 2H), 7.24 - 7.19 (m, 2H), 7.14 - 7.08 (m, 1H), 7.01 (d,  $J = 8.0$  Hz, 1H), 6.96 (s, 1H), 6.71 (d,  $J = 8.0$  Hz, 1H), 4.54 - 4.50 (m, 1H), 4.48 - 4.37 (m, 2H), 4.19 - 4.08 (m, 2H), 3.67 (s, 3H), 3.60 (dd,  $J_1 = 14.5$  Hz,  $J_2 = 9.0$  Hz, 1H), 3.25 (dd,  $J_1 = 14.5$  Hz,  $J_2 = 6.0$  Hz, 1H), 2.38 - 2.30 (m, 2H), 1.39 (t,  $J = 7.0$  Hz, 3H), 1.29 - 1.21 (m, 14H), 1.18 (t,  $J = 7.0$  Hz, 3H), 0.88 (t,  $J = 7.0$  Hz, 3H).  $^{13}\text{C}$  NMR (125 MHz,  $\text{CDCl}_3$ )  $\delta$  13.9, 14.0, 14.0, 22.6, 26.0, 29.3, 29.4, 29.5, 31.7, 31.8, 32.5, 35.5, 48.6, 61.4, 61.7, 109.2, 109.7, 110.4, 118.3, 119.0, 121.2, 121.6, 124.6, 127.4, 127.7, 128.0, 130.1, 136.8, 137.0, 139.6, 140.1, 167.1, 167.5, 170.4. HRMS (BRUKER micrOTOF-QII) calc d for  $\text{C}_{35}\text{H}_{44}\text{N}_2\text{O}_5$   $[\text{M}+\text{H}]^+$ : 573.3323, found 573.3335.

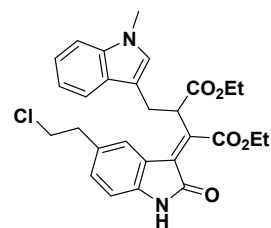

**Diethyl-(Z)-2-(5-(2-chloroethyl)-2-oxoindolin-3-ylidene)-3-((1-methyl-1H-indol-3-yl)methyl)succinate 3g:** Yellow oil (38.7 mg, 76% yield).  $^1\text{H}$  NMR (500 MHz,  $\text{CDCl}_3$ )  $\delta$  8.57 (s, 1H), 7.62 (d,  $J = 8.0$  Hz, 1H), 7.26 - 7.22 (m, 2H), 7.18 - 7.10 (m, 2H), 7.02 (d,  $J = 9.0$  Hz, 1H), 6.96 (s, 1H), 6.73 (d,  $J = 8.0$  Hz, 1H), 4.52 - 4.46 (m,

1H), 4.45 - 4.37 (m, 2H), 4.22 - 4.12 (m, 2H), 3.65 (s, 3H), 3.64 - 3.55 (m, 1H), 3.44 - 3.36 (m, 2H), 3.27 (dd,  $J = 14.5, 6.5$  Hz, 1H), 2.79 - 2.65 (m, 2H), 1.39 (t,  $J = 7.0$  Hz, 3H), 1.21 (t,  $J = 7.0$  Hz, 3H).  $^{13}\text{C}$  NMR (125 MHz,  $\text{CDCl}_3$ )  $\delta$  13.9, 14.0, 25.9, 32.5, 38.5, 44.9, 48.7, 61.6, 61.8, 109.4, 110.0, 110.2, 118.1, 119.1, 121.4, 121.7, 124.8, 127.2, 127.6, 128.1, 130.7, 132.0, 136.8, 140.6, 140.7, 166.9, 167.4, 170.3. HRMS (BRUKER micrOTOF-QII) calcd for  $\text{C}_{28}\text{H}_{29}\text{ClN}_2\text{O}_5$   $[\text{M}+\text{H}]^+$ : 509.1838, found 509.1829.

**Diethyl-(Z)-2-(5-(methoxycarbonyl)-2-oxoindolin-3-ylidene)-3-((1-methyl-1H-indol-**

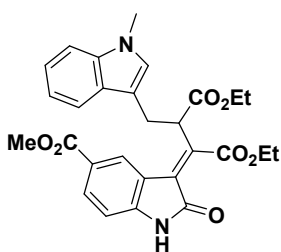

**3-yl)methyl)succinate 3h:** Yellow solid (41.4 mg, 82% yield).  $^1\text{H}$  NMR (500 MHz,  $\text{CDCl}_3$ )  $\delta$  8.80 (s, 1H), 8.13 (s, 1H), 7.95 - 7.91 (m, 1H), 7.66 (d,  $J = 8.0$  Hz, 1H), 7.20 - 7.12 (m, 2H), 7.09 - 7.04 (m, 1H), 7.03 (s, 1H), 6.83 (d,  $J = 8.0$  Hz, 1H), 4.60 - 4.54 (m, 1H), 4.51 - 4.36 (m, 2H), 4.20 - 4.06 (m, 2H), 3.82 (s, 3H), 3.67 - 3.59

(m, 1H), 3.65 (s, 3H), 3.31 (dd,  $J_1 = 14.5$  Hz,  $J_2 = 6.5$  Hz, 1H), 1.40 (t,  $J = 7.0$  Hz, 3H), 1.16 (t,  $J = 7.0$  Hz, 3H).  $^{13}\text{C}$  NMR (125 MHz,  $\text{CDCl}_3$ )  $\delta$  13.9, 26.6, 32.5, 49.3, 52.0, 61.6, 61.9, 109.0, 109.6, 110.2, 118.7, 119.0, 120.9, 121.5, 124.2, 125.6, 126.2, 127.7, 128.0, 132.3, 136.7, 142.4, 145.3, 166.3, 166.7, 167.4, 170.1. HRMS (BRUKER micrOTOF-QII) calcd for  $\text{C}_{28}\text{H}_{28}\text{N}_2\text{O}_7$   $[\text{M}+\text{H}]^+$ : 505.1970, found 505.1962.

**Diethyl-(Z)-2-(5-(((9H-fluoren-9-yl)methoxy)carbonyl)amino)-2-oxoindolin-3-**

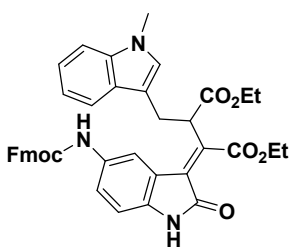

**ylidene)-3-((1-methyl-1H-indol-3-yl)methyl)succinate 3i:**

Yellow solid (58.2 mg, 85% yield).  $^1\text{H}$  NMR (500 MHz,  $\text{CDCl}_3$ )  $\delta$  8.20 (s, 1H), 7.83 (d,  $J = 7.5$  Hz, 2H), 7.70 - 7.61 (m, 3H), 7.49 - 7.33 (m, 5H), 7.17 - 7.11 (m, 1H), 7.04 - 6.95 (m, 2H), 6.91 (s, 1H), 6.63 (d,  $J = 8.5$  Hz, 1H), 6.45 (s, 1H), 4.58 - 4.48 (m, 2H),

4.47 - 4.36 (m, 2H), 4.33 - 4.23 (m, 2H), 4.23 - 4.14 (m, 2H), 3.59 (dd,  $J_1 = 14.5$  Hz,  $J_2 = 6.0$  Hz, 1H), 3.51 (s, 3H), 3.28 (dd,  $J_1 = 14.5$  Hz,  $J_2 = 8.5$  Hz, 1H), 1.39 (t,  $J = 7.0$  Hz, 3H), 1.27 - 1.20 (m, 3H).  $^{13}\text{C}$  NMR (126 MHz,  $\text{CDCl}_3$ )  $\delta$  13.9, 14.0, 26.0, 32.4, 47.2, 48.8, 61.6, 61.8, 109.5, 109.8, 110.0, 118.2, 118.8, 120.0, 121.1, 121.7, 124.8, 124.9, 127.1, 127.8, 127.9, 128.5, 136.8, 141.4, 143.8, 166.9, 167.1, 170.4. HRMS (BRUKER micrOTOF-QII) calcd for  $\text{C}_{41}\text{H}_{37}\text{N}_3\text{O}_7$   $[\text{M}+\text{H}]^+$ : 684.2705, found 684.2720.

**Diethyl-(Z)-2-(5-methoxy-2-oxoindolin-3-ylidene)-3-((1-methyl-1H-indol-3-yl)methyl)**

**succinate 3j:** Red solid (34.7 mg, 73% yield), m.p. 152.0 - 153.0  $^\circ\text{C}$ .

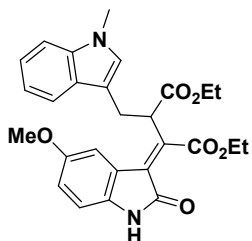

$^1\text{H}$  NMR (500 MHz,  $\text{CDCl}_3$ )  $\delta$  1.19 (t,  $J = 7.0$  Hz, 3H), 1.41 (t,  $J = 7.0$  Hz, 3H), 3.28 (dd,  $J_1 = 6.0$  Hz,  $J_2 = 14.5$  Hz, 1H), 3.51 (s, 3H), 3.60 (dd,  $J_1 = 9.0$  Hz,  $J_2 = 14.5$  Hz, 1H), 3.68 (s, 3H), 4.12 - 4.17 (m, 2H), 4.42 - 4.49 (m, 3H), 6.71 (d,  $J = 10.5$  Hz, 1H), 6.76 (dd,  $J_1 = 2.0$  Hz,  $J_2 = 10.5$  Hz, 1H), 6.97 (s, 1H), 7.01 (s, 1H), 7.11 (t,  $J = 7.0$  Hz, 1H), 7.21 (t,  $J = 7.0$  Hz, 3H), 7.25 (d,  $J = 10.5$  Hz, 1H), 7.63 (d,  $J = 7.5$  Hz, 1H), 8.96 (s, 1H);  $^{13}\text{C}$  NMR (125 MHz,  $\text{CDCl}_3$ )  $\delta$  14.0, 14.0, 26.0, 32.6, 48.6, 55.7, 61.6, 61.8, 109.2, 110.3, 110.5, 110.9, 115.9, 118.4, 119.0, 121.6, 121.8, 127.6, 127.9, 127.9, 135.8, 136.8, 140.6, 155.2, 167.1, 167.9, 170.3. IR (KBr): 3341, 2993, 1724, 1629, 1485, 1373, 1205, 1165, 1021, 858, 742  $\text{cm}^{-1}$ . HRMS (BRUKER micrOTOF-QII) calcd for  $\text{C}_{27}\text{H}_{28}\text{N}_2\text{O}_6$   $[\text{M}+\text{H}]^+$ : 477.2020, found 477.2027.

**Diethyl-(Z)-2-((4-methoxy-1-methyl-1H-indol-3-yl)methyl)-3-(2-oxoindolin-3-ylidene)**

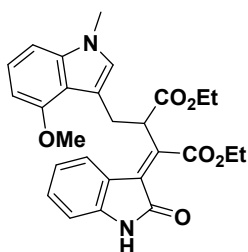

**succinate 3k:** Yellow solid (42.4 mg, 89% yield), m.p. 97.6 - 99.0  $^{\circ}\text{C}$ .  $^1\text{H}$  NMR (500 MHz,  $\text{CDCl}_3$ )  $\delta$  1.16 (t,  $J = 7.0$  Hz, 3H), 1.42 (t,  $J = 7.0$  Hz, 3H), 3.45 (dd,  $J_1 = 6.0$  Hz,  $J_2 = 14.0$  Hz, 1H), 3.55 (dd,  $J_1 = 8.5$  Hz,  $J_2 = 14.0$  Hz, 1H), 3.63 (s, 3H), 3.69 (s, 3H), 4.09 - 4.17 (m, 2H), 4.42 - 4.49 (m, 2H), 4.87 (dd,  $J_1 = 6.0$  Hz,  $J_2 = 8.5$  Hz, 1H),

6.47 (d,  $J = 8.0$  Hz, 1H), 6.78 (dd,  $J_1 = 6.0$  Hz,  $J_2 = 7.5$  Hz, 2H), 6.83 (s, 1H), 6.85 (d,  $J = 8.5$  Hz, 1H), 7.10 (d,  $J = 8.0$  Hz, 1H), 7.16 (d,  $J = 7.5$  Hz, 1H), 7.61 (d,  $J = 8.0$  Hz, 1H), 9.20 (s, 1H);  $^{13}\text{C}$  NMR (125 MHz,  $\text{CDCl}_3$ )  $\delta$  14.0, 14.0, 27.4, 32.7, 49.0, 54.9, 61.2, 61.6, 98.8, 102.7, 110.0, 110.7, 117.5, 121.3, 121.8, 122.2, 124.8, 127.3, 127.3, 130.0, 138.7, 140.7, 142.0, 154.3, 167.2, 168.1, 170.4. IR (KBr): 3673, 2988, 1723, 1466, 1254, 1153, 1057, 846, 737  $\text{cm}^{-1}$ . HRMS (BRUKER micrOTOF-QII) calcd for  $\text{C}_{27}\text{H}_{28}\text{N}_2\text{O}_6$   $[\text{M}+\text{H}]^+$ : 477.2020, found 477.2020.

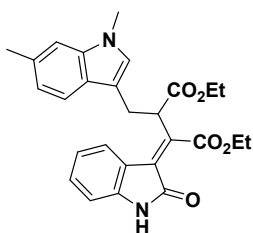

**Diethyl-(Z)-2-((1,6-dimethyl-1H-indol-3-yl)methyl)-3-(2-**

**oxoindolin-3-ylidene) succinate 3l:** Yellow solid (36.3 mg, 79% yield), m.p. 80.0 - 81.0  $^{\circ}\text{C}$ .  $^1\text{H}$  NMR (500 MHz,  $\text{CDCl}_3$ )  $\delta$  1.18 (t,  $J = 7.0$  Hz, 3H), 1.40 (t,  $J = 7.0$  Hz, 3H), 2.72 (s, 3H), 3.21 (dd,  $J_1 = 5.5$  Hz,  $J_2 = 14.5$  Hz, 1H), 3.56 (dd,  $J_1 = 9.0$  Hz,  $J_2 = 14.5$  Hz, 1H),

3.94 (s, 3H), 4.11 - 4.18 (m, 2H), 4.40 - 4.47 (m, 2H), 4.50 (dd,  $J_1 = 5.5$  Hz,  $J_2 = 9.0$  Hz, 1H), 6.81-6.84 (m, 3H), 6.90 (d,  $J = 7.0$  Hz, 1H), 6.97 (d,  $J = 8.0$  Hz, 1H), 7.21 (t,  $J = 8.0$  Hz, 1H), 7.41 (d,  $J = 7.0$  Hz, 1H), 7.46 (d,  $J = 8.0$  Hz, 1H), 8.66 (s, 1H);  $^{13}\text{C}$  NMR (125

MHz, CDCl<sub>3</sub>) δ 13.9, 14.0, 19.6, 25.9, 36.5, 48.6, 61.5, 61.7, 110.0, 110.1, 116.5, 119.3, 121.1, 121.3, 122.1, 124.2, 124.6, 127.1, 128.8, 129.5, 130.2, 135.6, 140.5, 141.8, 167.0, 167.5, 170.3. IR (KBr): 3354, 2961, 1725, 1609, 1466, 1367, 1218, 1142, 1016, 859, 743 cm<sup>-1</sup>. HRMS (BRUKER micrOTOF-QII) calcd for C<sub>27</sub>H<sub>28</sub>N<sub>2</sub>O<sub>5</sub> [M+H]<sup>+</sup>: 461.2071, found 461.2085.

**Diethyl-(Z)-2-((5-methoxy-1-methyl-1*H*-indol-3-yl)methyl)-3-(2-oxoindolin-3-ylidene)**

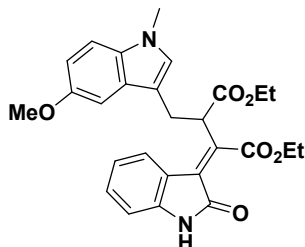

**succinate 3m:** Yellow solid (30.5 mg, 64% yield), m.p. 84.0 - 85.0 °C. <sup>1</sup>H NMR (500 MHz, CDCl<sub>3</sub>) δ 1.19 (t, *J* = 7.0 Hz, 3H), 1.42 (t, *J* = 7.0 Hz, 3H), 3.25 (dd, *J*<sub>1</sub> = 5.0 Hz, *J*<sub>2</sub> = 14.5 Hz, 1H), 3.59 (dd, *J*<sub>1</sub> = 9.0 Hz, *J*<sub>2</sub> = 14.5 Hz, 1H), 3.65(s, 3H), 3.81 (s, 3H), 4.11 - 4.23 (m, 2H), 4.23 - 4.50 (m, 2H), 4.54 (dd, *J*<sub>1</sub> = 5.0

Hz, *J*<sub>2</sub> = 9.0 Hz, 1H), 6.84 - 6.89 (m, 3H), 6.94 (s, 1H), 7.04 (d, *J* = 2.0 Hz, 1H), 7.14 (d, *J* = 10.5 Hz, 1H), 7.21 (t, *J* = 8.0 Hz, 1H), 7.49 (d, *J* = 8.0 Hz, 1H), 9.44 (s, 1H); <sup>13</sup>C NMR (125 MHz, CDCl<sub>3</sub>) δ 12.9, 12.9, 25.1, 31.7, 47.6, 54.8, 60.5, 60.7, 99.1, 108.9, 109.09, 109.3, 111.0, 120.0, 120.9, 123.3, 126.3, 126.8, 127.3, 131.1, 139.4, 141.2, 152.9, 166.0, 166.9, 169.4. IR (KBr): 3673, 2988, 1723, 1466, 1254, 1153, 1057, 846, 737 cm<sup>-1</sup>. HRMS (BRUKER micrOTOF-QII) calcd for C<sub>27</sub>H<sub>28</sub>N<sub>2</sub>O<sub>6</sub> [M+H]<sup>+</sup>: 477.2020, found 477.2023.

**Diethyl-(Z)-2-((1,7-dimethyl-1*H*-indol-3-yl)methyl)-3-(2-oxoindolin-3-ylidene)**

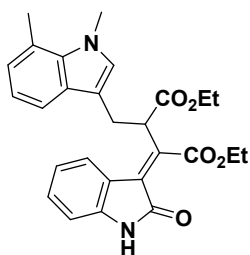

**succinate 3n:** Yellow solid (37.3 mg, 81% yield), m.p. 190 - 191 °C.

<sup>1</sup>H NMR (500 MHz, CDCl<sub>3</sub>) δ 1.18 (t, *J* = 7.0 Hz, 3H), 1.42 (t, *J* = 7.0 Hz, 3H), 2.51 (s, 3H), 3.24 (dd, *J*<sub>1</sub> = 5.0 Hz, *J*<sub>2</sub> = 14.5 Hz, 1H), 3.60 (dd, *J*<sub>1</sub> = 9.5 Hz, *J*<sub>2</sub> = 14.5 Hz, 1H), 3.66 (s, 3H), 4.10 - 4.20 (m, 2H), 4.42 - 4.49 (m, 2H), 4.53 (dd, *J*<sub>1</sub> = 5.0 Hz, *J*<sub>2</sub> = 9.5 Hz, 1H), 6.84

- 6.90 (m, 3H), 6.97 (d, *J* = 8.0 Hz, 1H), 7.07 (s, 1H), 7.23 (t, *J* = 8.0 Hz, 1H), 7.50 (dd, *J*<sub>1</sub> = 8.0 Hz, *J*<sub>2</sub> = 11.5 Hz, 1H), 9.20 (s, 1H); <sup>13</sup>C NMR (125 MHz, CDCl<sub>3</sub>) δ 13.9, 14.0, 21.8, 26.1, 32.5, 48.8, 61.5, 61.7, 109.3, 110.3, 110.3, 118.2, 120.7, 121.1, 122.1, 124.6, 125.6, 127.2, 127.2, 130.3, 131.4, 137.3, 140.6, 142.1, 167.0, 167.8, 170.4. IR (KBr): 3189, 2981, 1745, 1706, 1615, 1466, 1345, 1289, 1176, 1096, 1014, 853, 793, 731 cm<sup>-1</sup>. HRMS (BRUKER micrOTOF-QII) calcd for C<sub>27</sub>H<sub>28</sub>N<sub>2</sub>O<sub>5</sub> [M+H]<sup>+</sup>: 461.2071, found 461.2087.

**Diethyl-1-(2-((methoxycarbonyl)amino)phenyl)-9-methyl-9*H*-carbazole-2,3-**

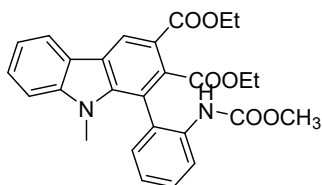

**dicarboxylate 6:** White solid (45% yield), m.p. 155.6 - 156.7



°C.  $^1\text{H}$  NMR (500 MHz, Actone- $d_6$ )  $\delta$  0.99 (t,  $J = 7.5$  Hz, 3H), 1.44 (t,  $J = 7.5$  Hz, 3H), 3.22 (s, 3H), 3.59 (s, 3H), 4.04 - 4.08 (m, 2H), 4.41 - 4.45 (m, 2H), 6.58 (s, 1H), 7.17 (t,  $J = 7.5$  Hz, 1H), 7.28 (t,  $J = 7.5$  Hz, 1H), 7.33 - 7.37 (m, 2H), 7.49 (t,  $J = 7.5$  Hz, 1H), 7.55 (t,  $J = 7.5$  Hz, 1H), 8.04 (d,  $J = 7.5$  Hz, 1H), 8.21 (d,  $J = 7.5$  Hz, 1H), 8.88 (s, 1H);  $^{13}\text{C}$  NMR (125 MHz, Actone- $d_6$ )  $\delta$  13.6, 14.3, 30.9, 52.1, 61.3, 61.4, 109.4, 118.1, 118.2, 120.6, 120.6, 121.2, 122.2, 123.2, 123.3, 123.8, 126.2, 127.2, 130.0, 132.1, 134.9, 137.6, 139.9, 142.8, 154.1, 166.0, 169.0. IR (KBr): 3429, 3055, 2982, 2903, 1725, 1656, 1600, 1371, 1309, 1232, 1191, 1064, 950, 803, 735, 689  $\text{cm}^{-1}$ . HRMS (BRUKER micrOTOF-QII) calcd for  $\text{C}_{27}\text{H}_{25}\text{F}_3\text{N}_2\text{O}_5$   $[\text{M}+\text{H}]^+$ : 475.1864, found 475.1860.

## 7. NMR spectra for substrates and products

**2a**  $^1\text{H}$  NMR (500 MHz,  $\text{CDCl}_3$ ) and  $^{13}\text{C}$  NMR (125 MHz,  $\text{CDCl}_3$ )

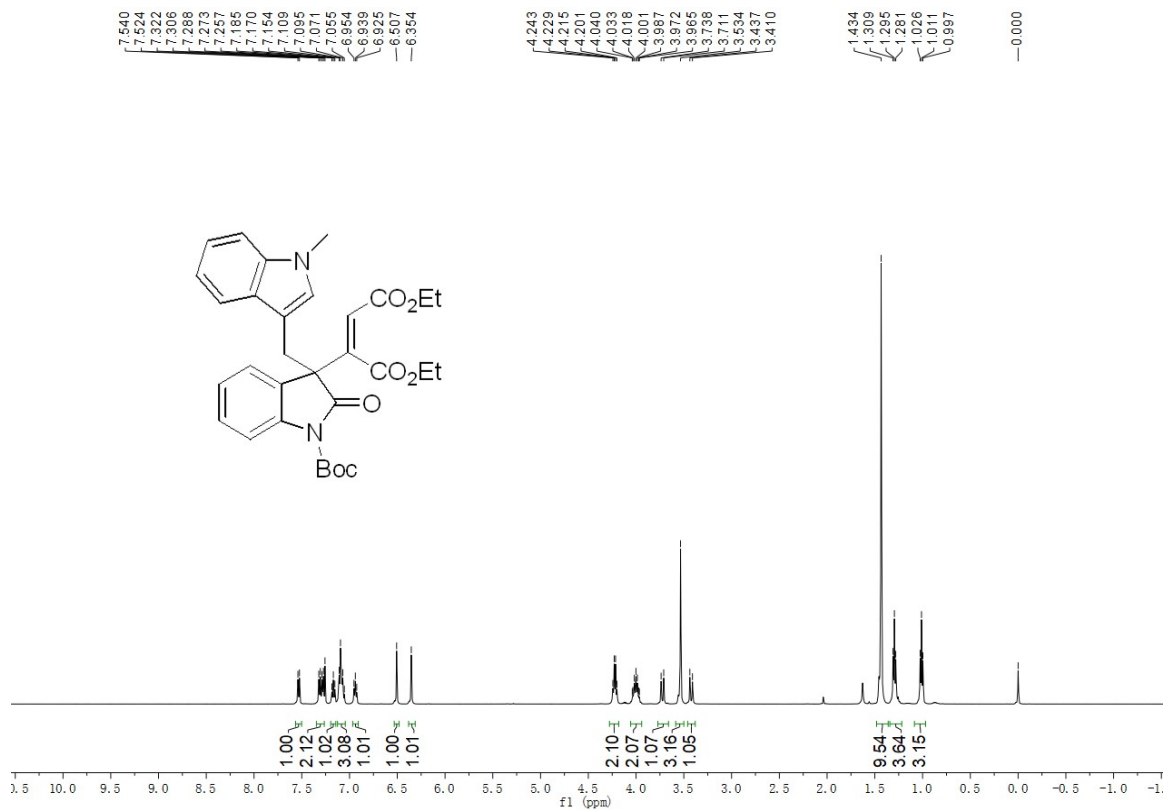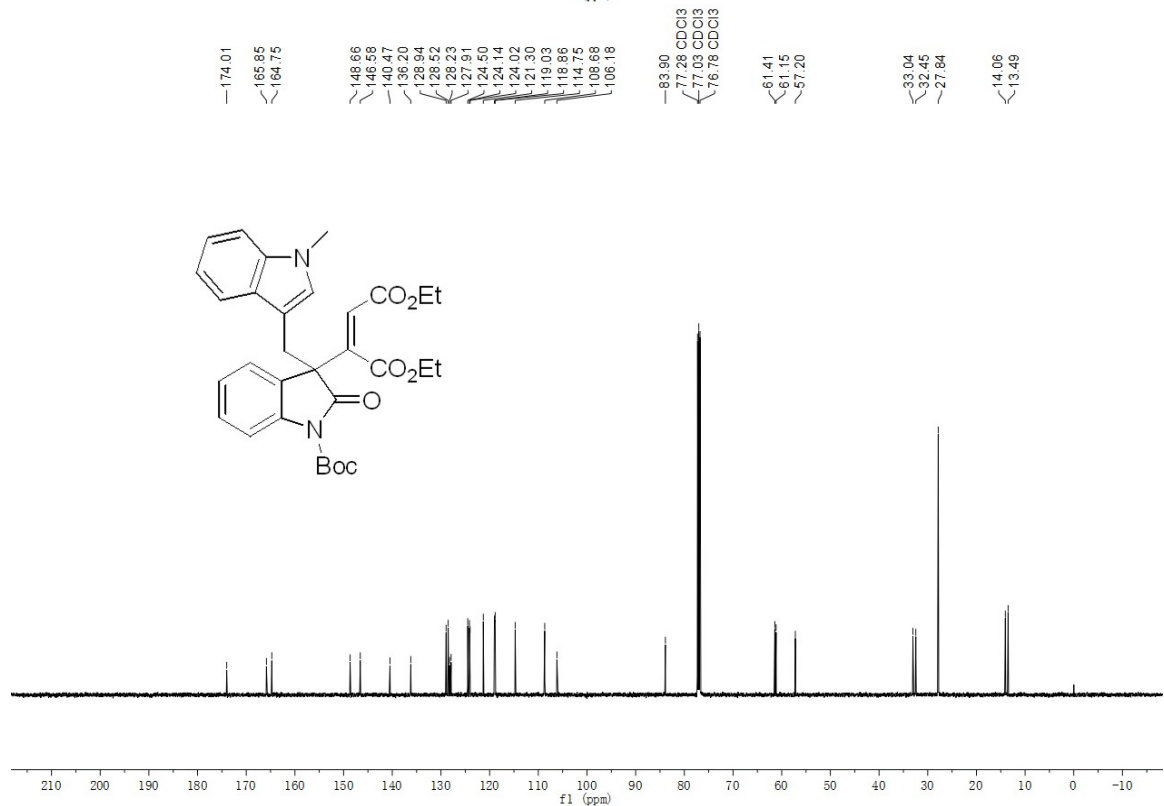

**2b <sup>1</sup>H NMR (500 MHz, CDCl<sub>3</sub>) and <sup>13</sup>C NMR (125 MHz, CDCl<sub>3</sub>)**

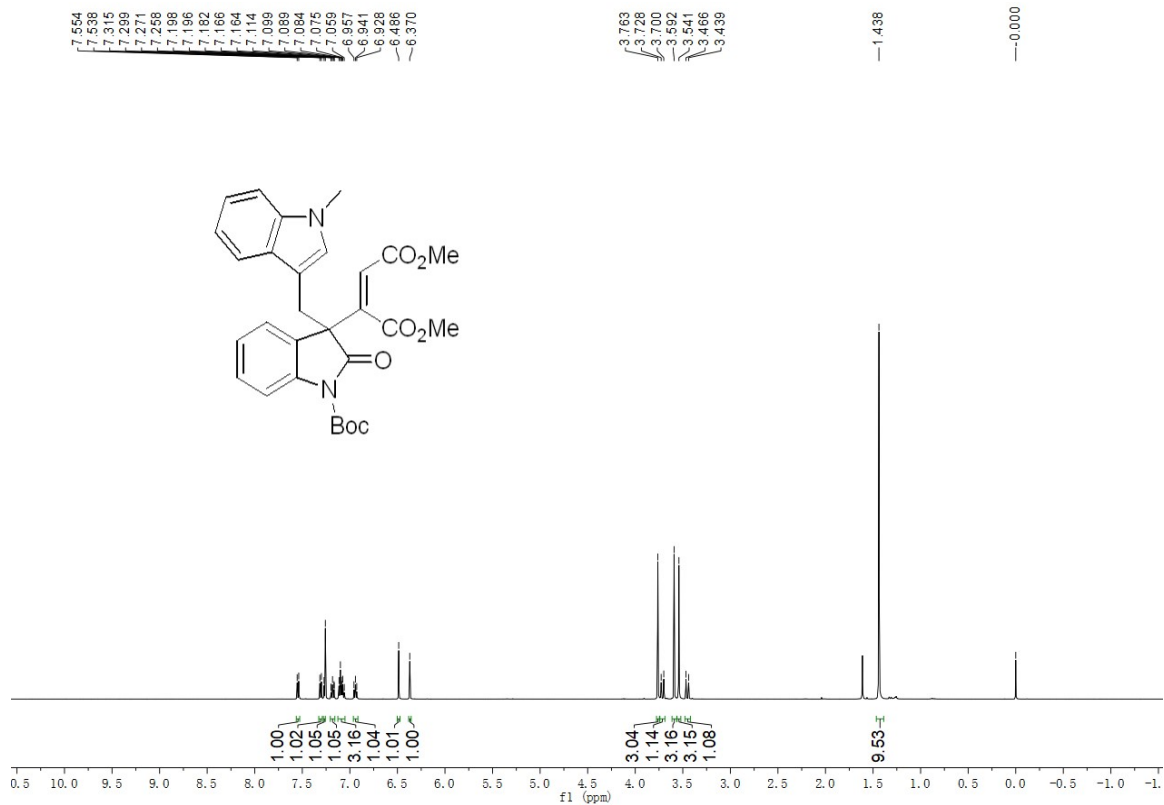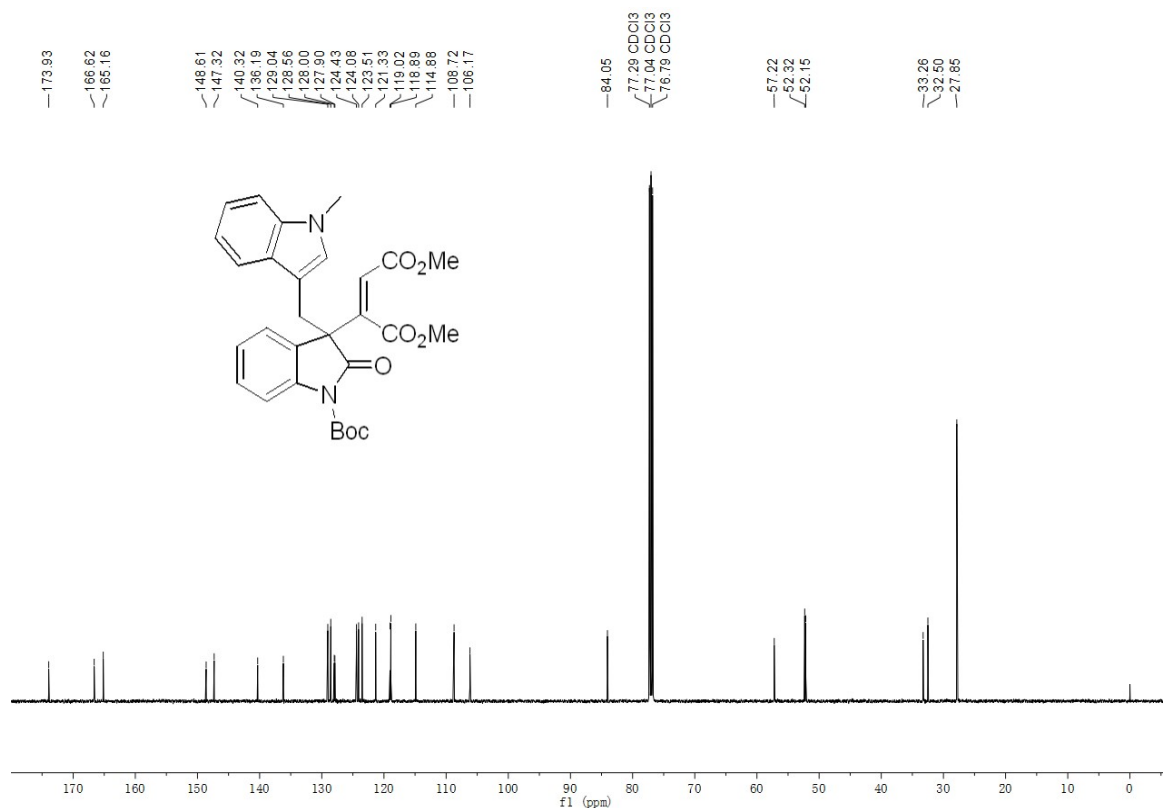

**2c** <sup>1</sup>H NMR (500 MHz, CDCl<sub>3</sub>), <sup>13</sup>C NMR (125 MHz, CDCl<sub>3</sub>)

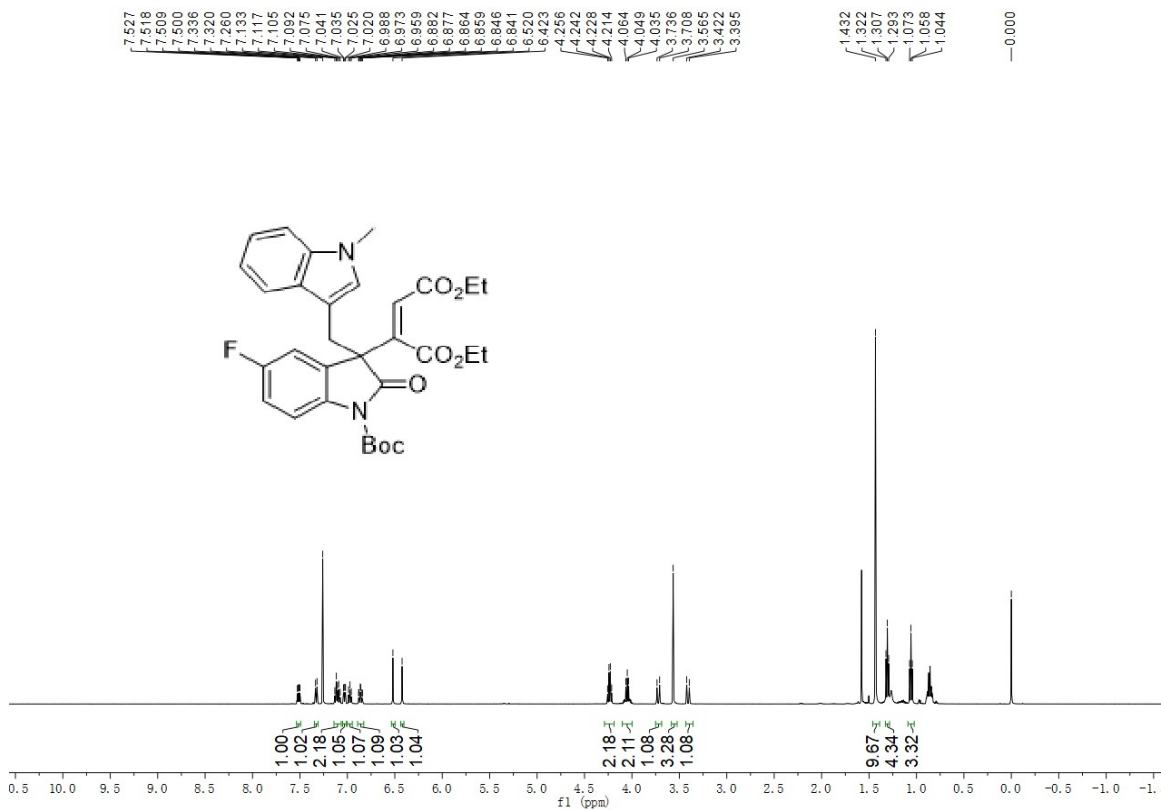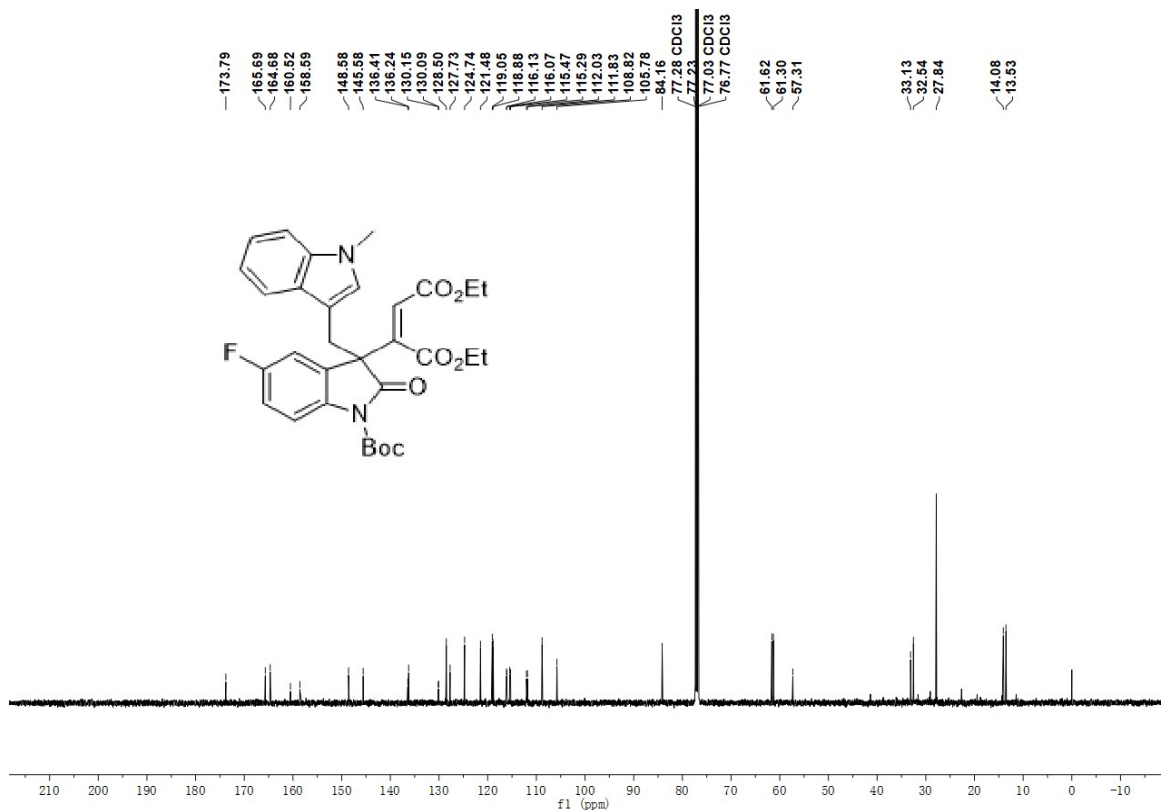

2d <sup>1</sup>H NMR (500 MHz, CDCl<sub>3</sub>) and <sup>13</sup>C NMR (125 MHz, CDCl<sub>3</sub>)

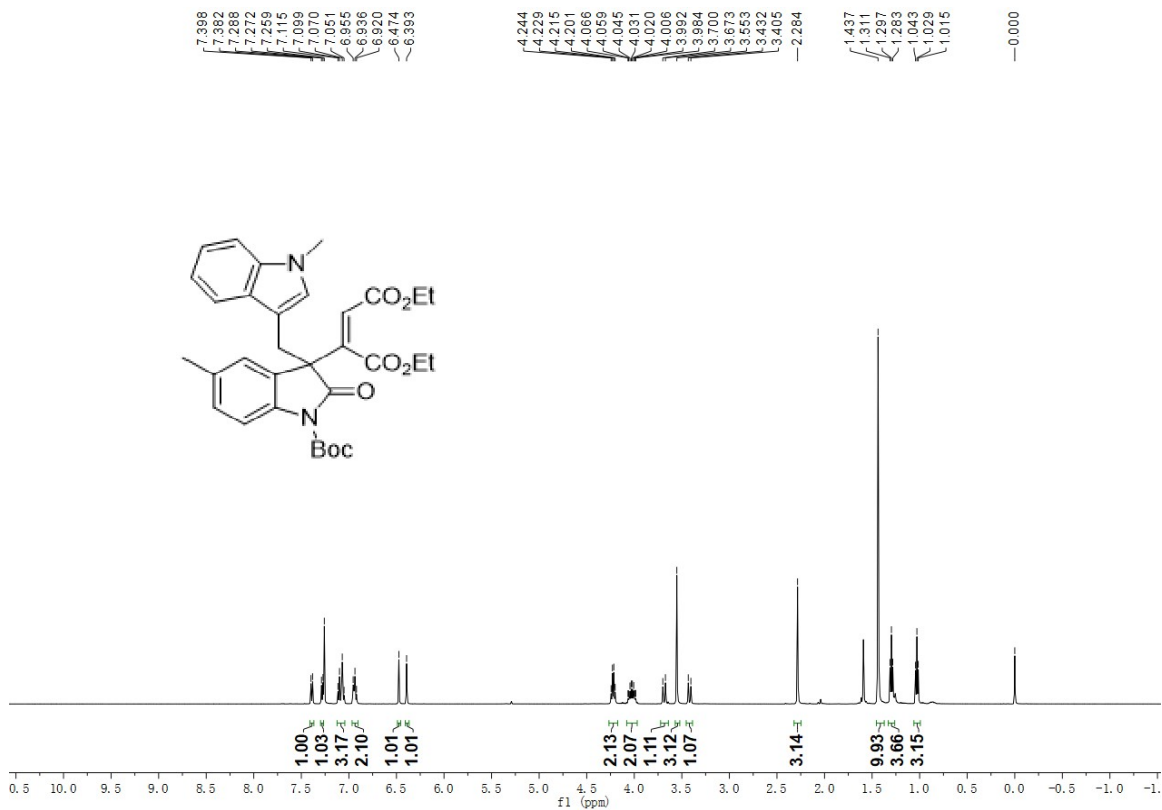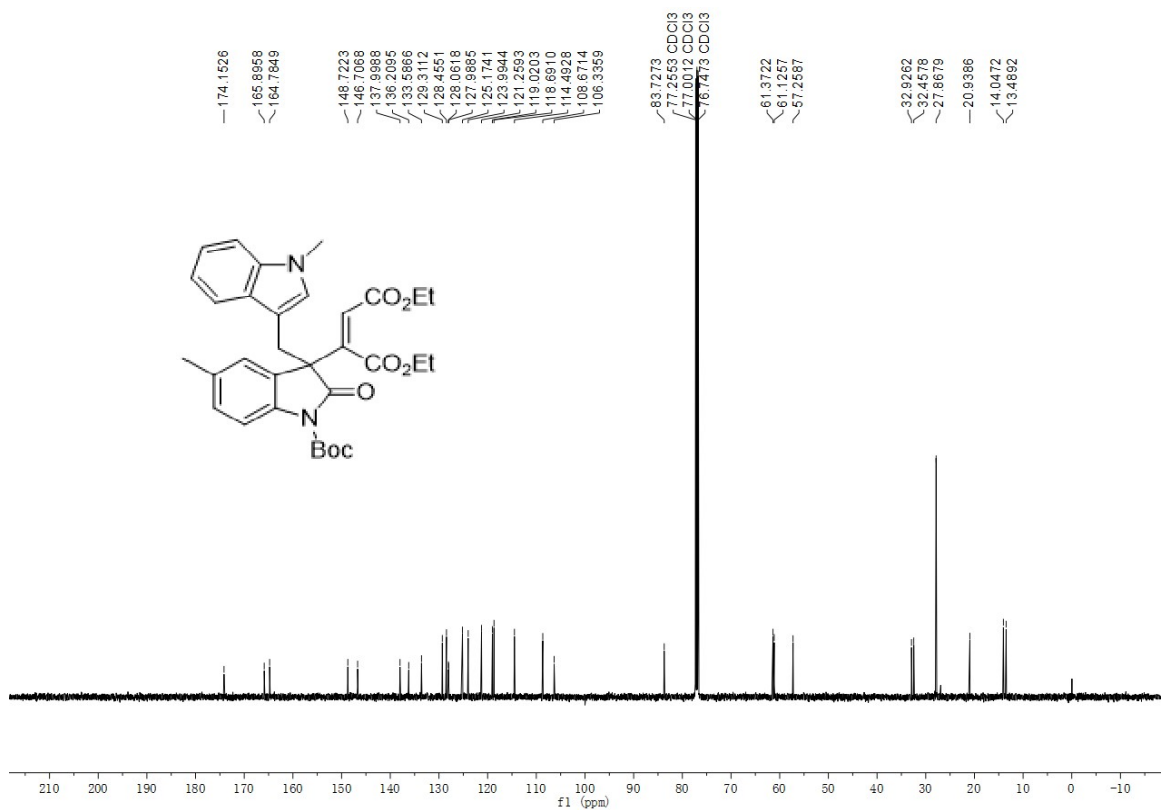

2e <sup>1</sup>H NMR (500 MHz, CDCl<sub>3</sub>) and <sup>13</sup>C NMR (125 MHz, CDCl<sub>3</sub>)

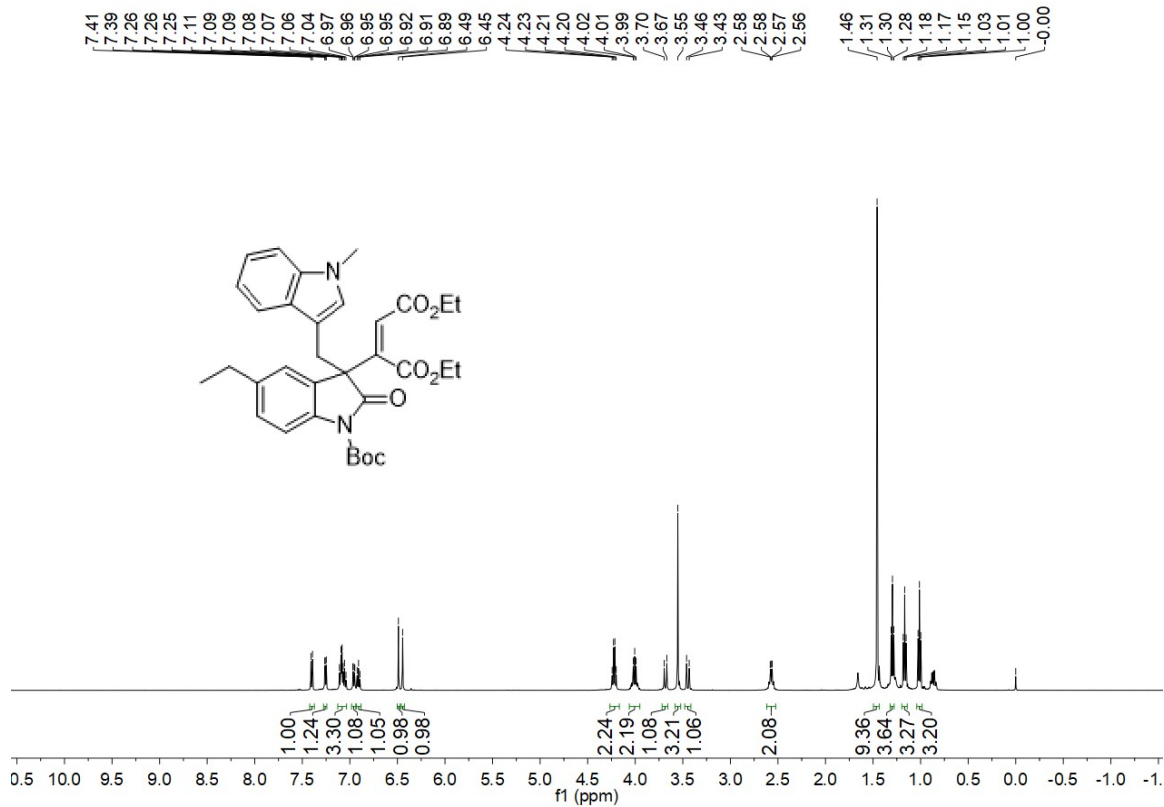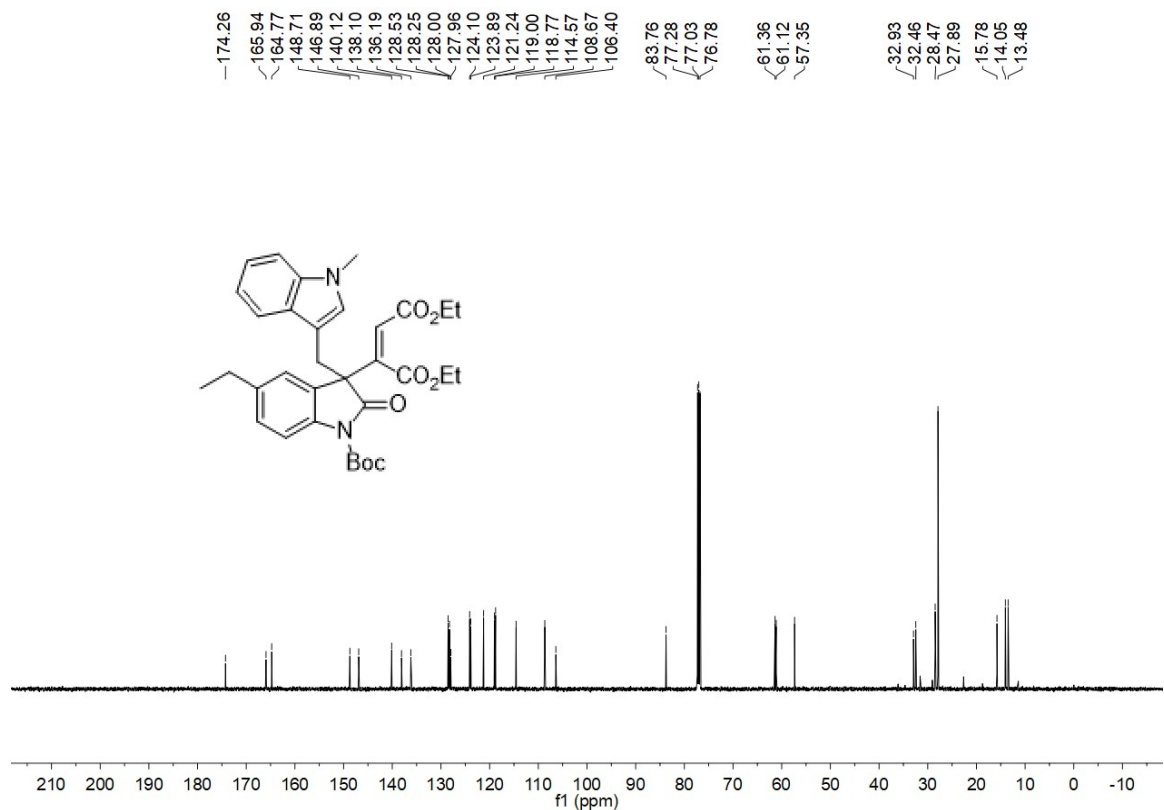

**<sup>1</sup>H NMR (500 MHz, CDCl<sub>3</sub>) and <sup>13</sup>C NMR (125 MHz, CDCl<sub>3</sub>)**

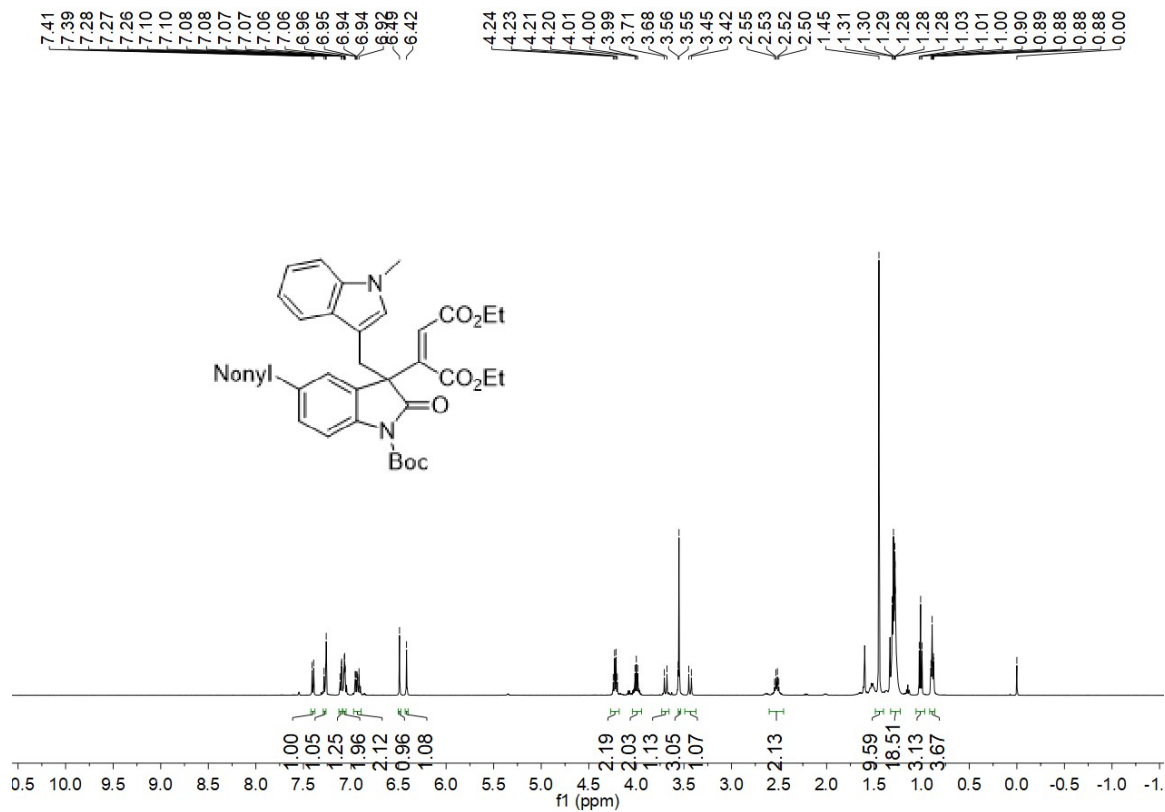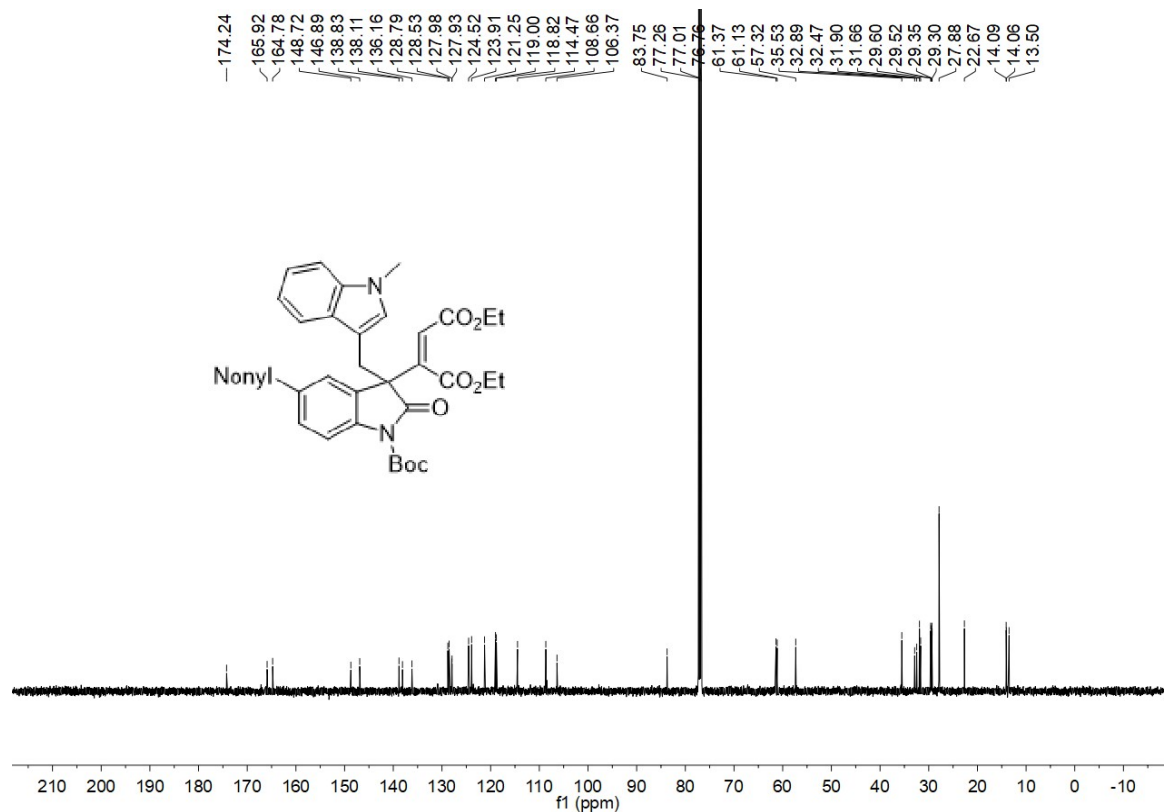

2g <sup>1</sup>H NMR (500 MHz, CDCl<sub>3</sub>) and <sup>13</sup>C NMR (125 MHz, CDCl<sub>3</sub>)

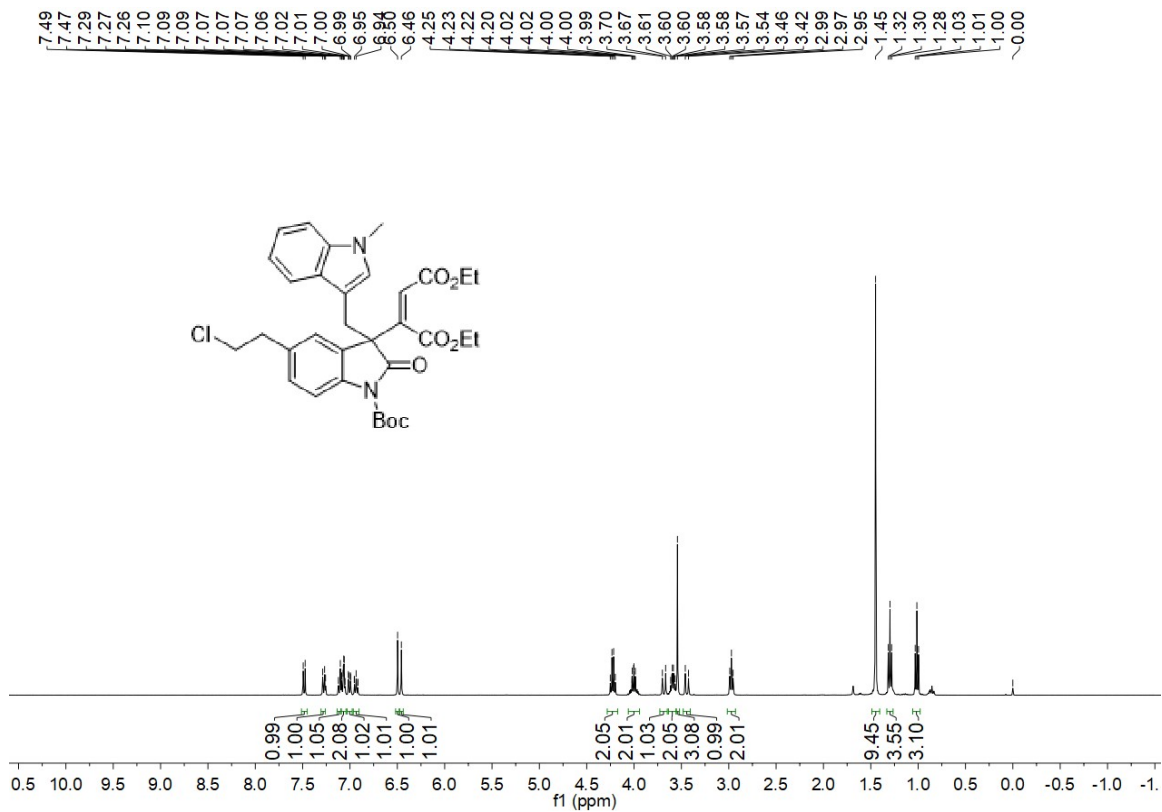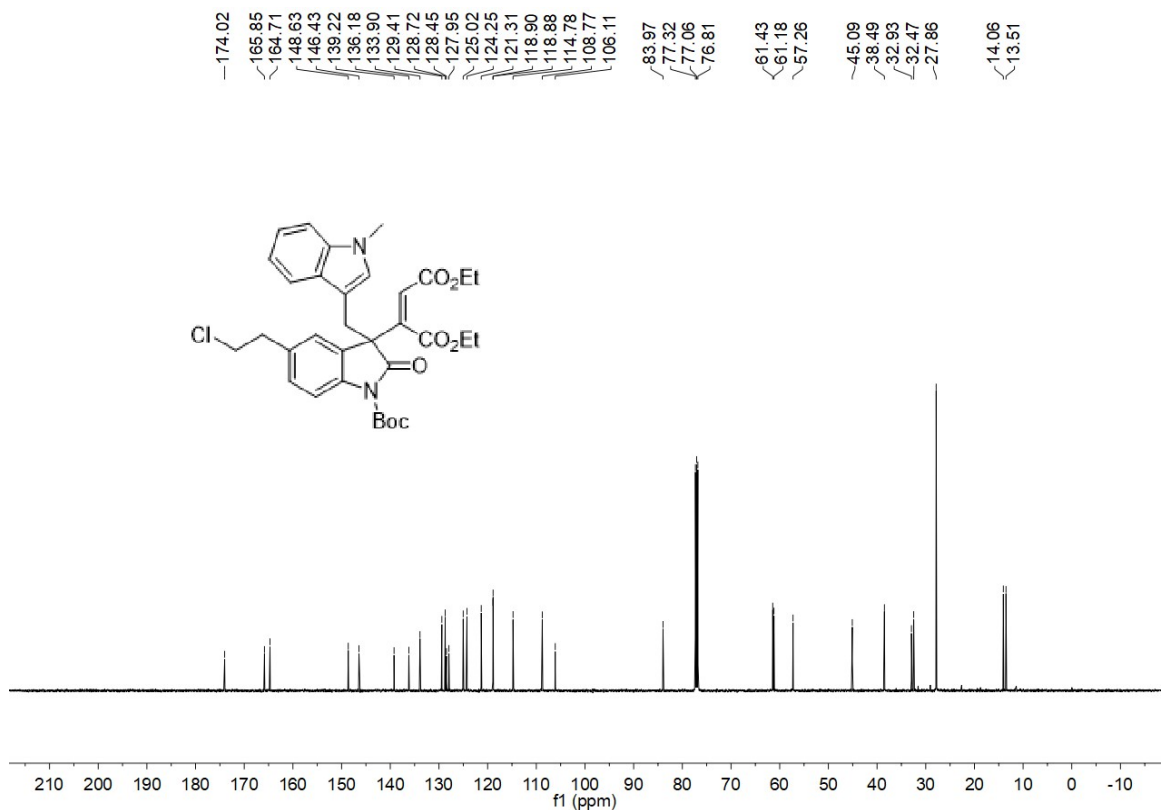

2h <sup>1</sup>H NMR (500 MHz, CDCl<sub>3</sub>) and <sup>13</sup>C NMR (125 MHz, CDCl<sub>3</sub>)



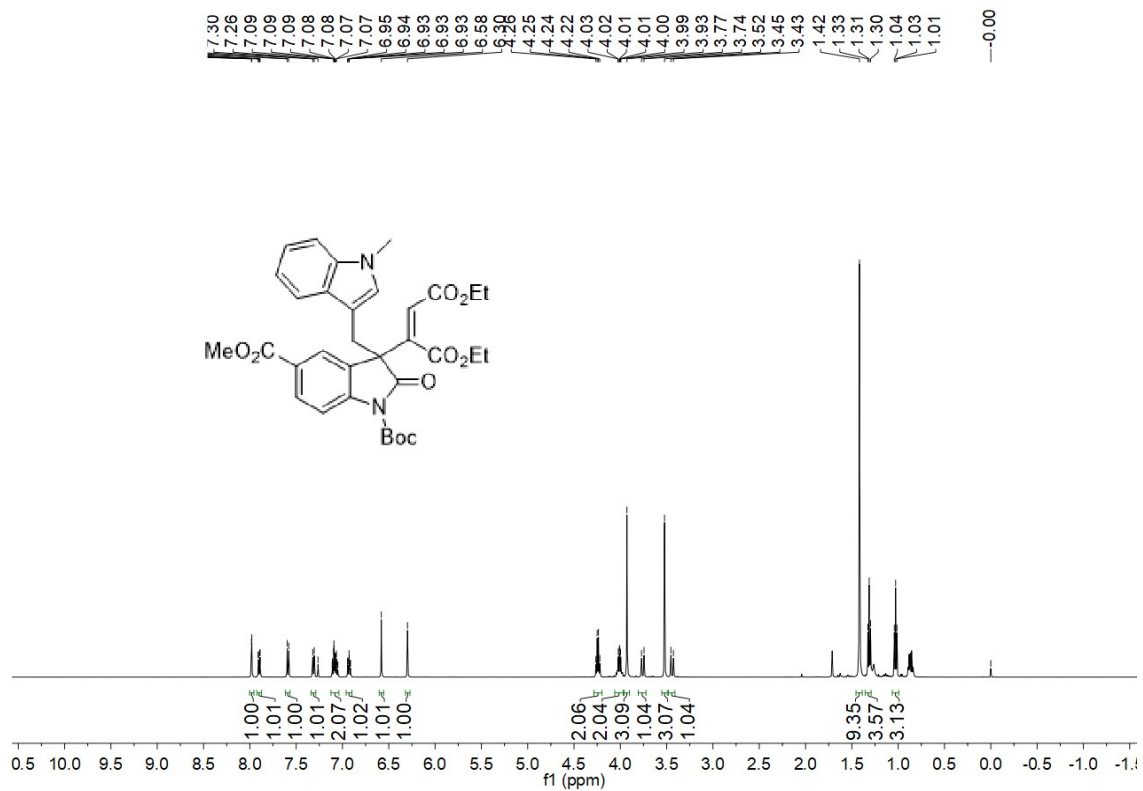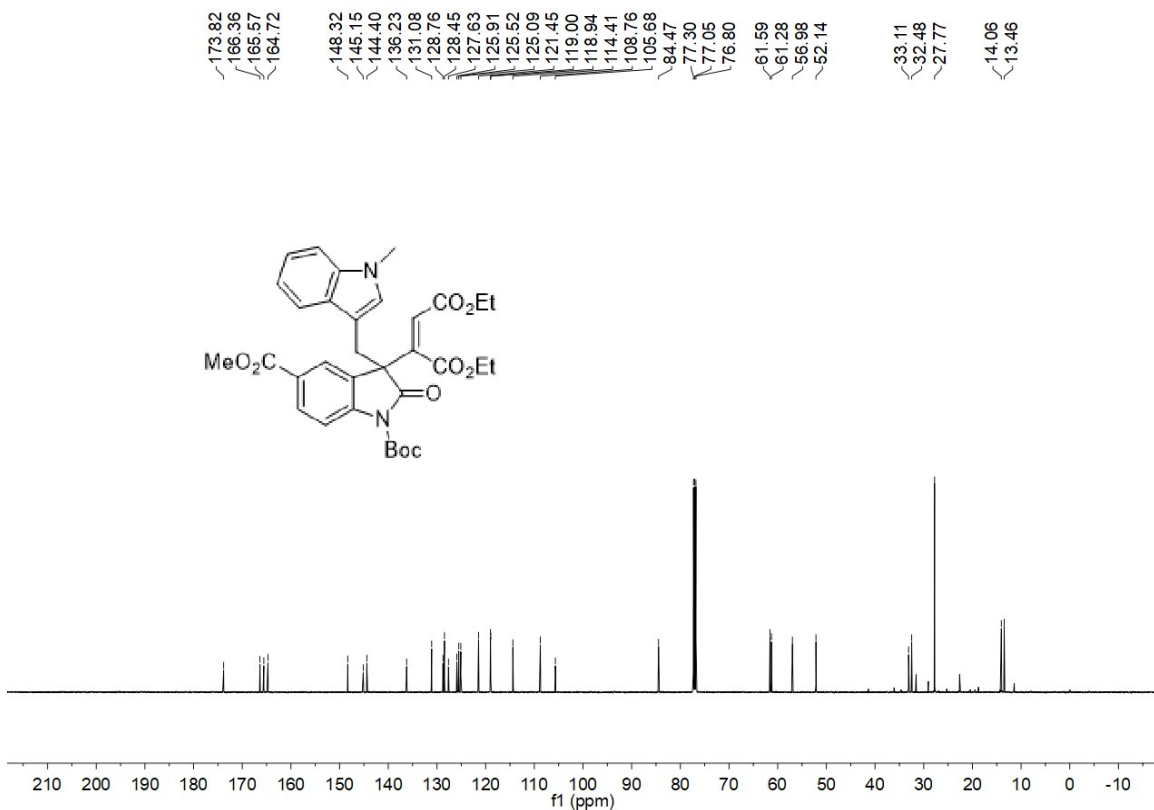

**<sup>2i</sup> <sup>1</sup>H NMR (500 MHz, CDCl<sub>3</sub>) and <sup>13</sup>C NMR (125 MHz, CDCl<sub>3</sub>)**

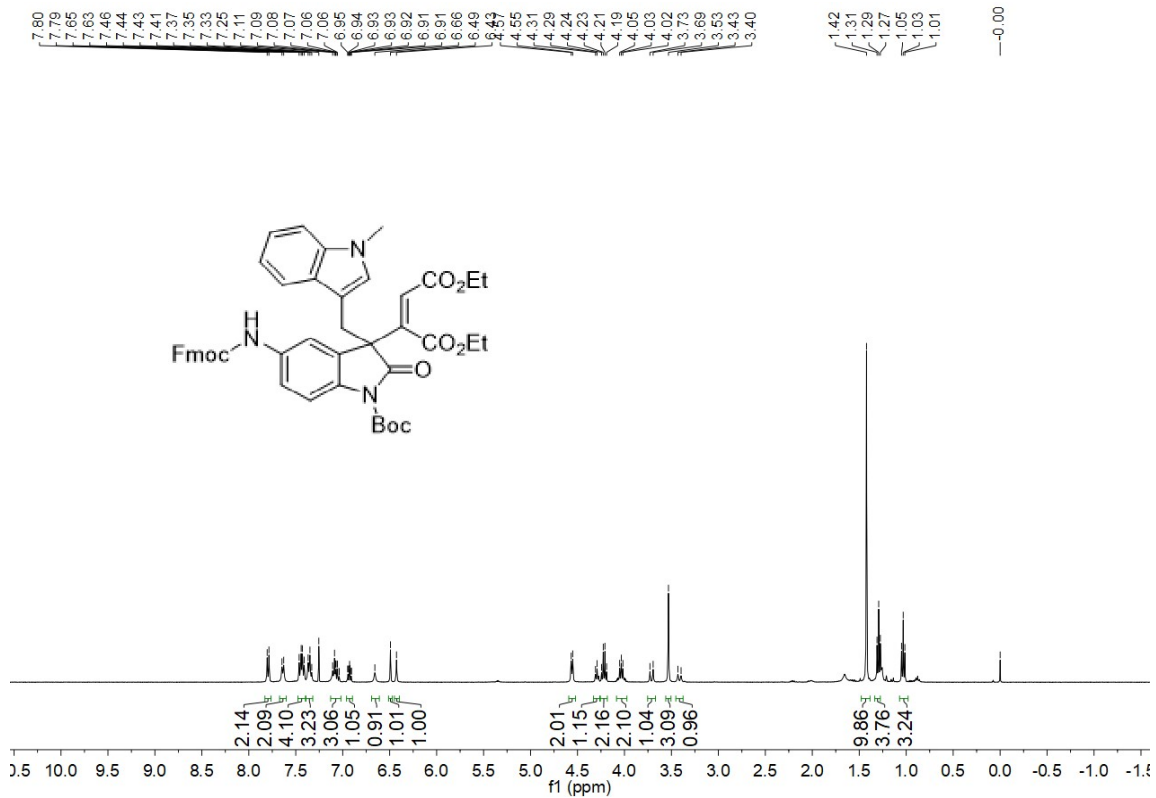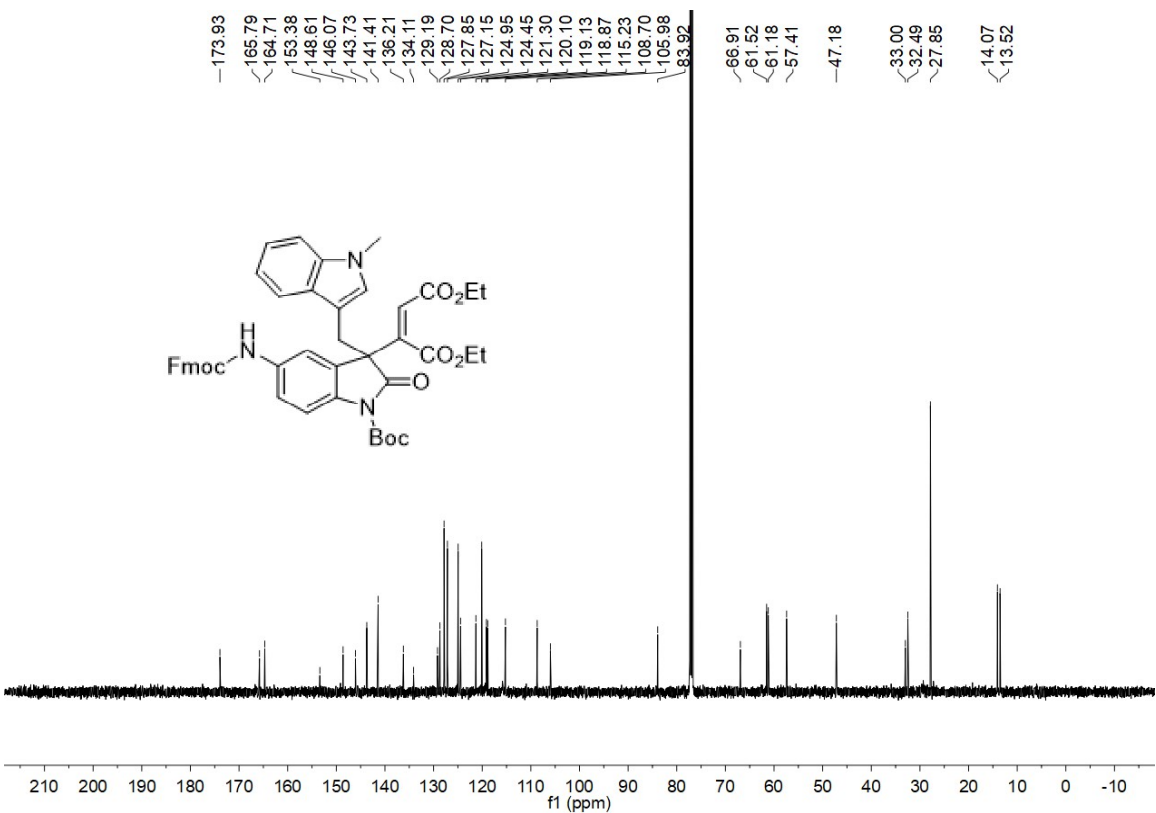

**<sup>2j</sup> <sup>1</sup>H NMR (500 MHz, CDCl<sub>3</sub>) and <sup>13</sup>C NMR (125 MHz, CDCl<sub>3</sub>)**

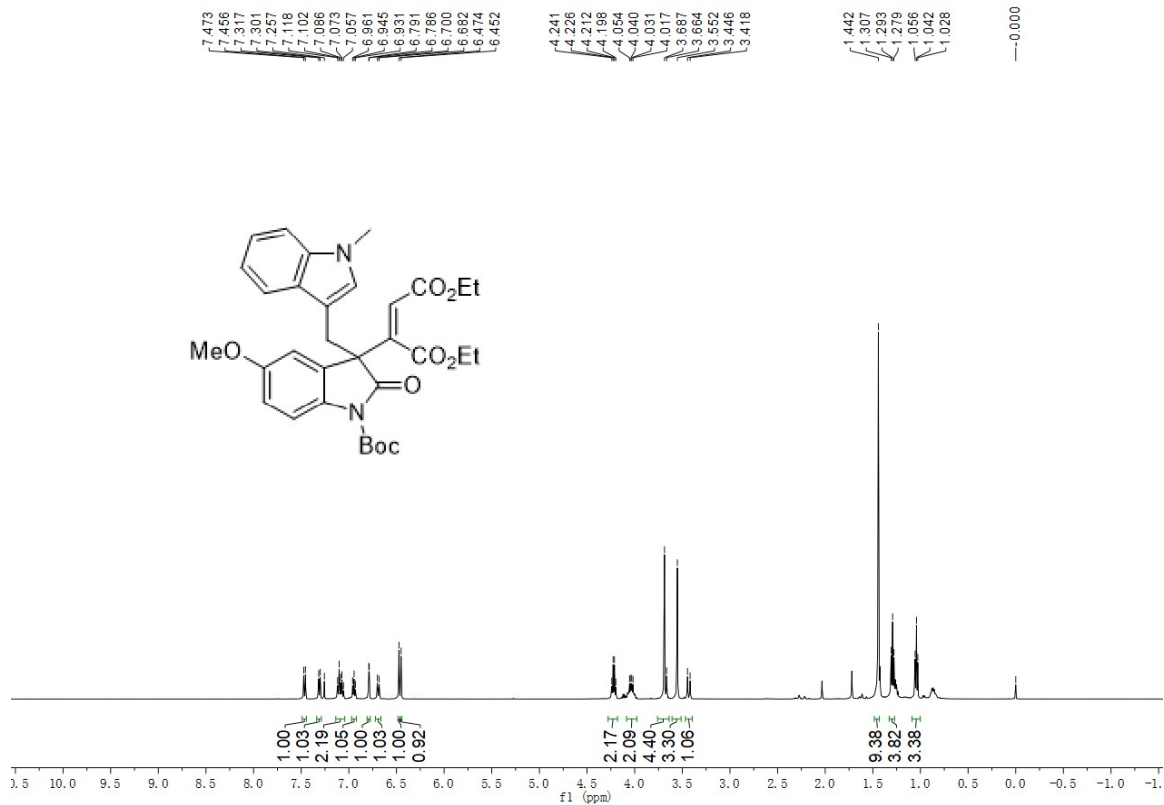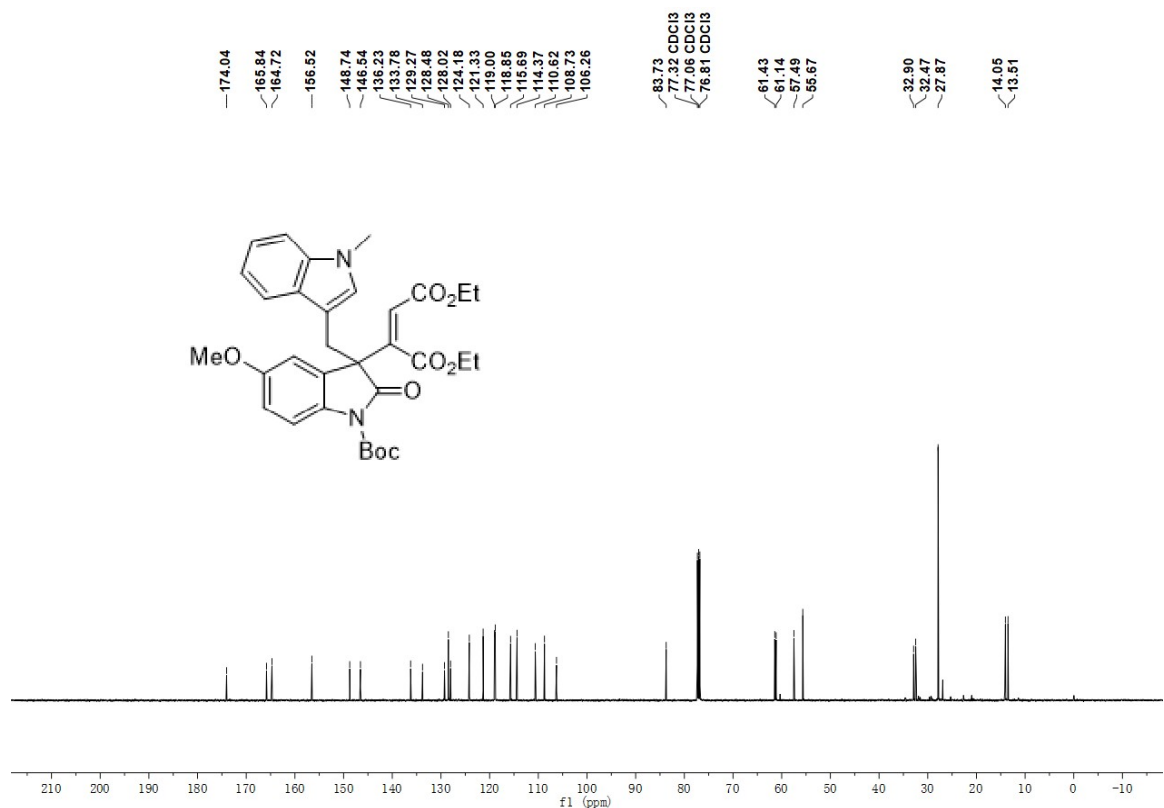

**2k <sup>1</sup>H NMR (500 MHz, CDCl<sub>3</sub>) and <sup>13</sup>C NMR (125 MHz, CDCl<sub>3</sub>)**

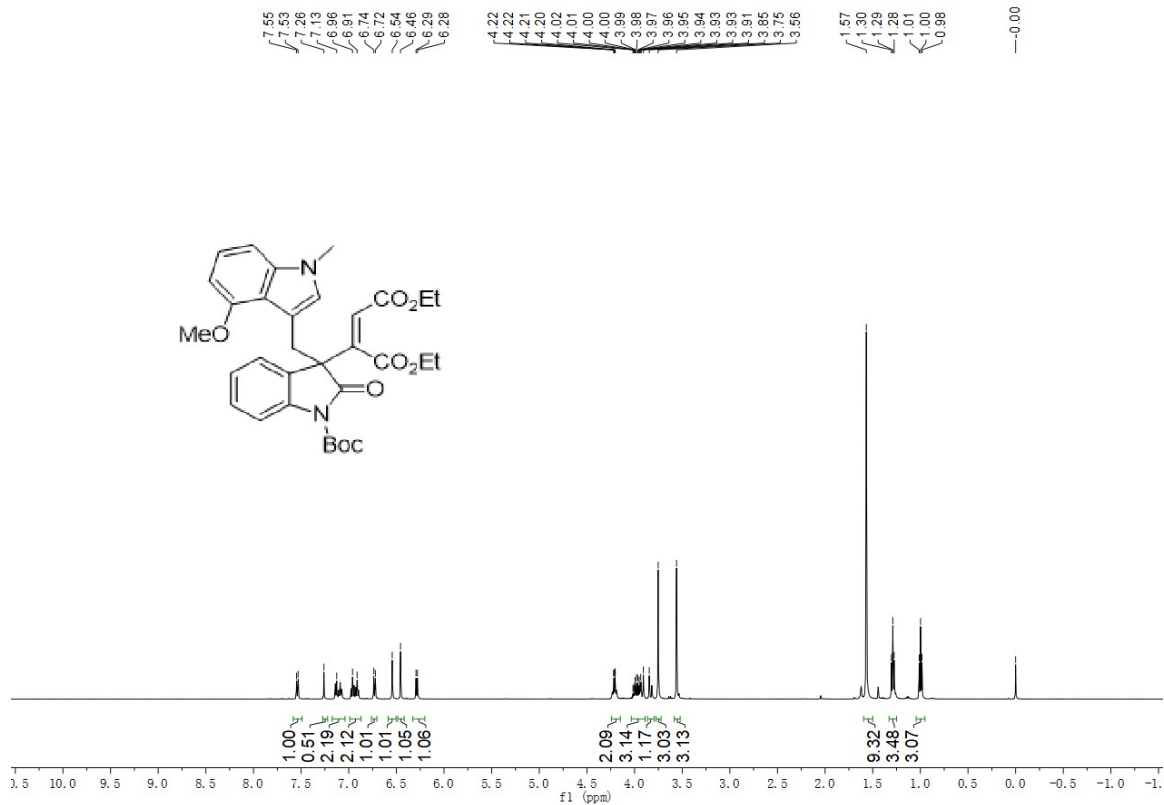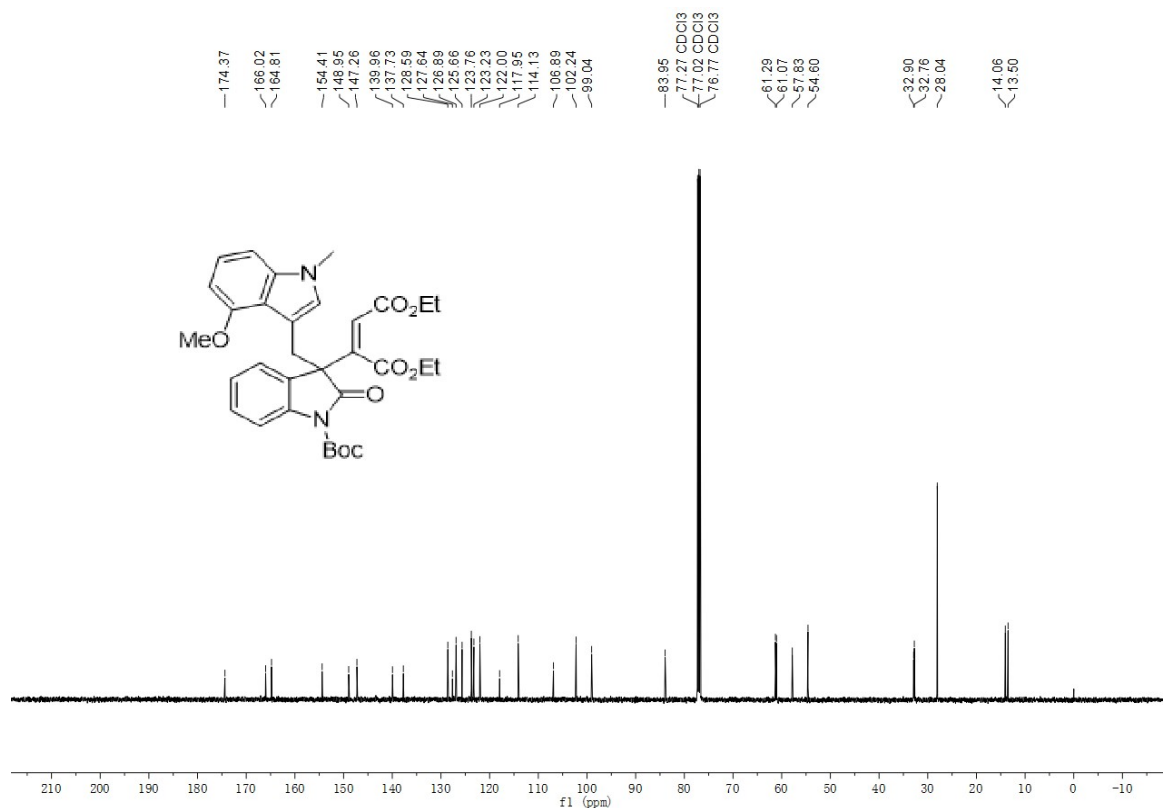

21 <sup>1</sup>H NMR (500 MHz, CDCl<sub>3</sub>) and <sup>13</sup>C NMR (125 MHz, CDCl<sub>3</sub>)

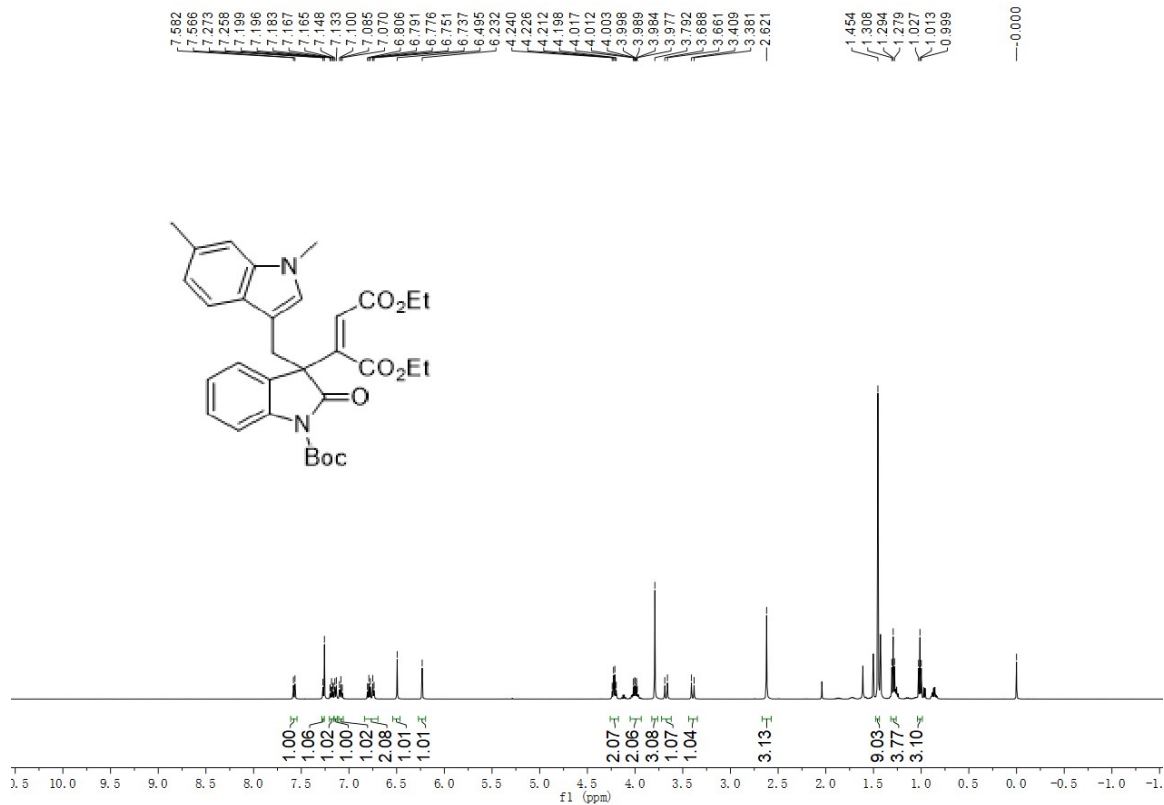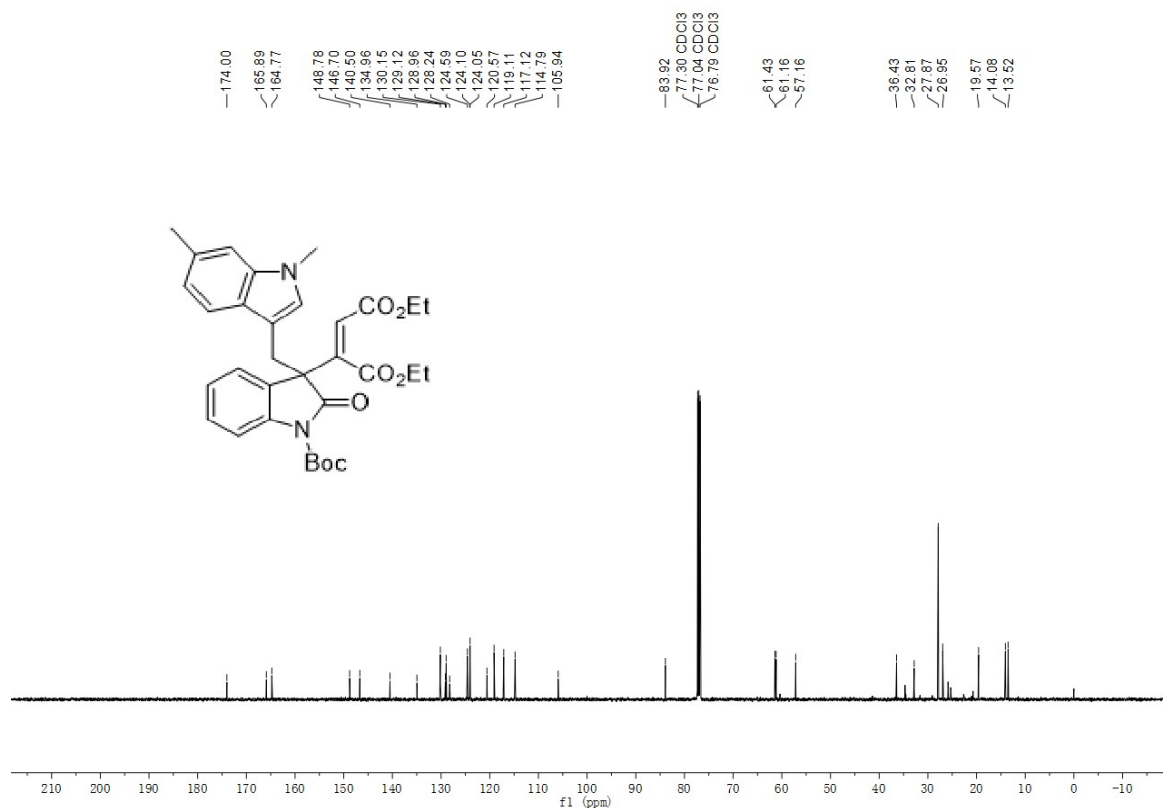

2m <sup>1</sup>H NMR (500 MHz, CDCl<sub>3</sub>) and <sup>13</sup>C NMR (125 MHz, CDCl<sub>3</sub>)

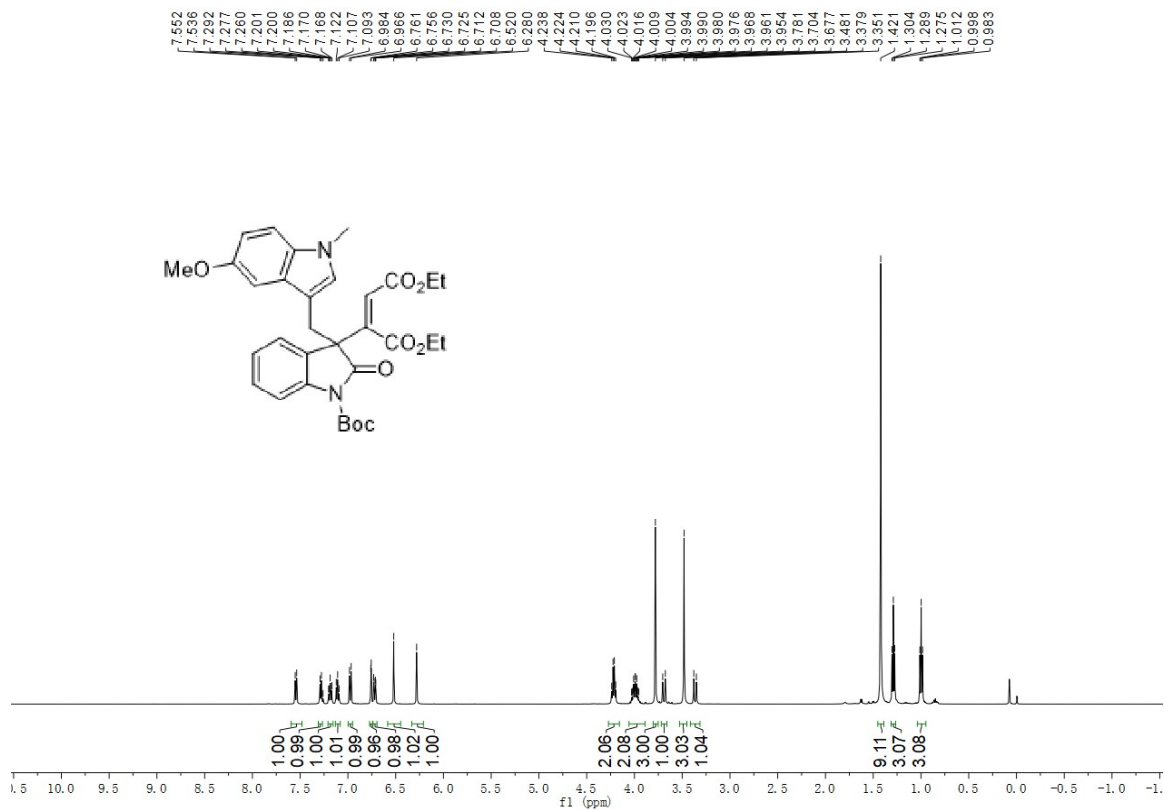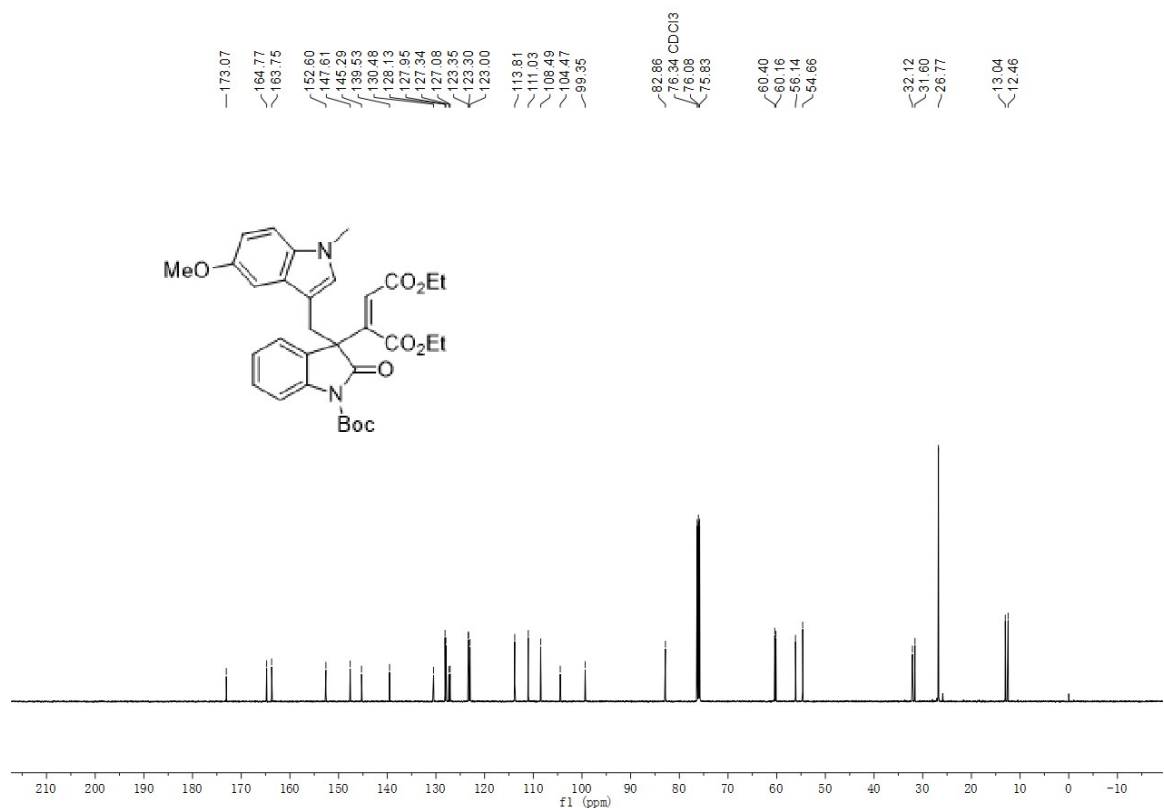

2n <sup>1</sup>H NMR (500 MHz, CDCl<sub>3</sub>) and <sup>13</sup>C NMR (125 MHz, CDCl<sub>3</sub>)

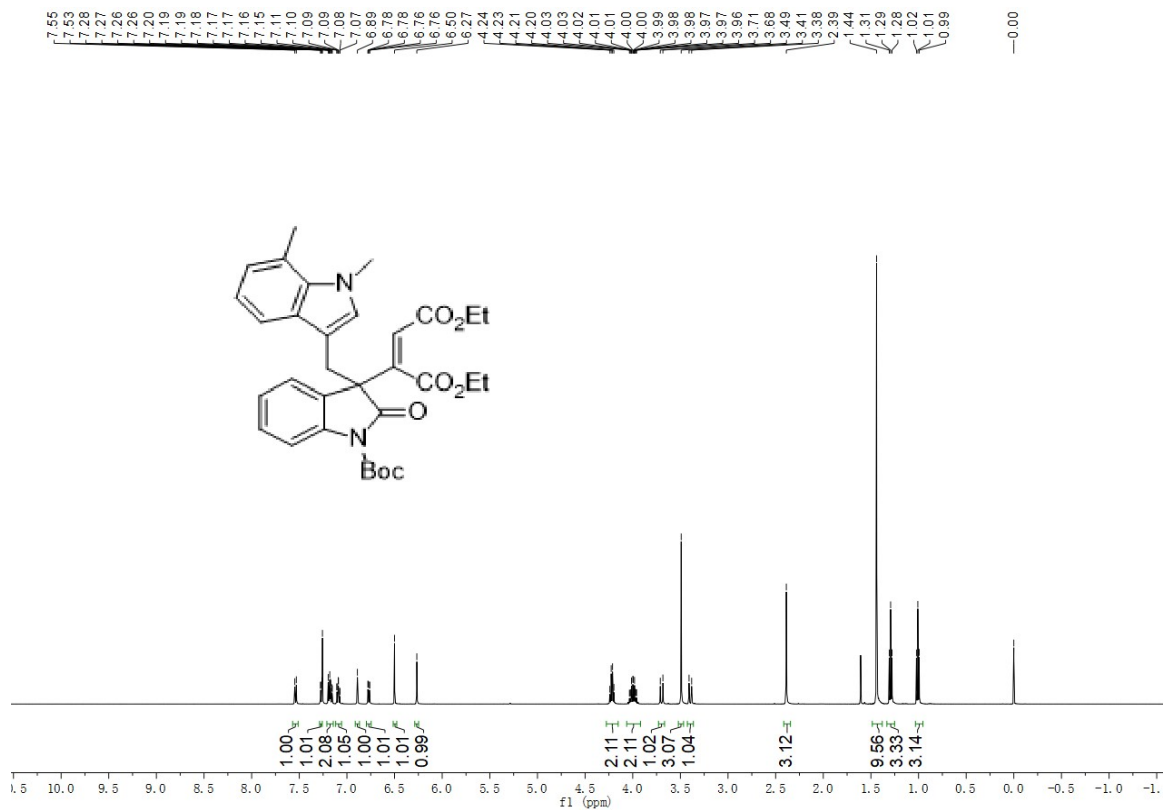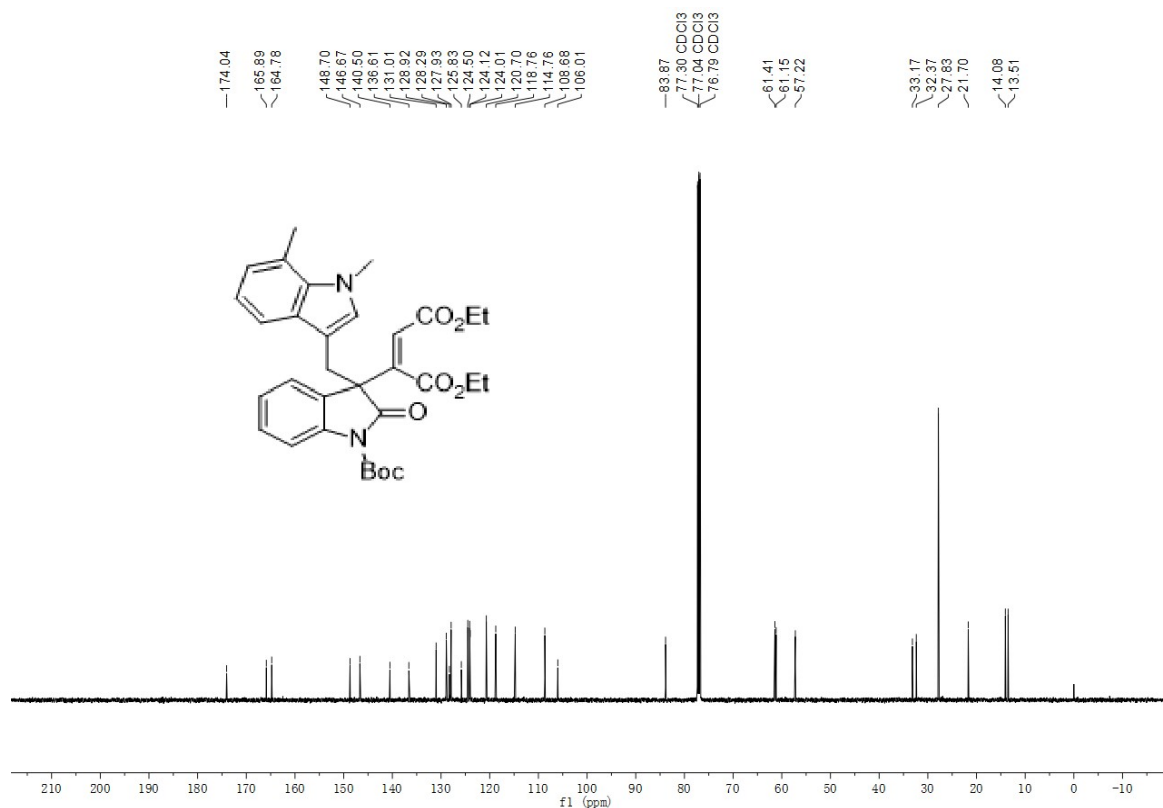

3a <sup>1</sup>H NMR (500 MHz, CDCl<sub>3</sub>) and <sup>13</sup>C NMR (125 MHz, CDCl<sub>3</sub>)

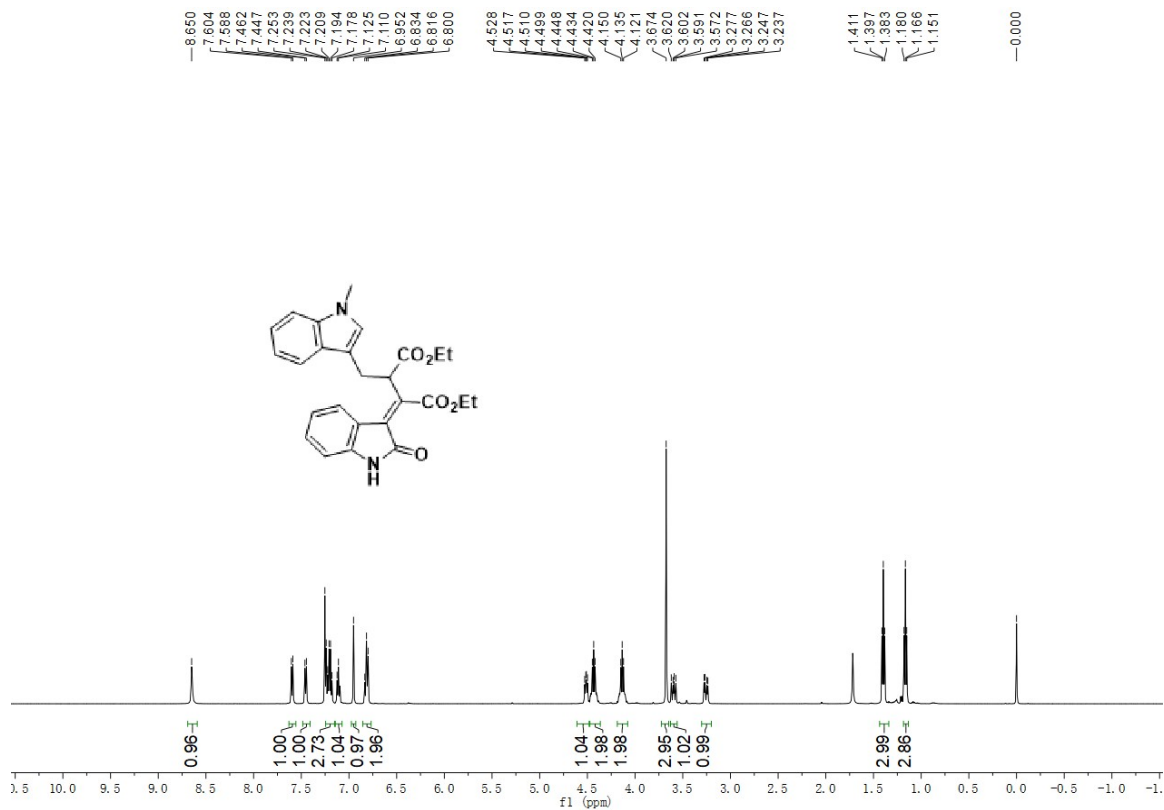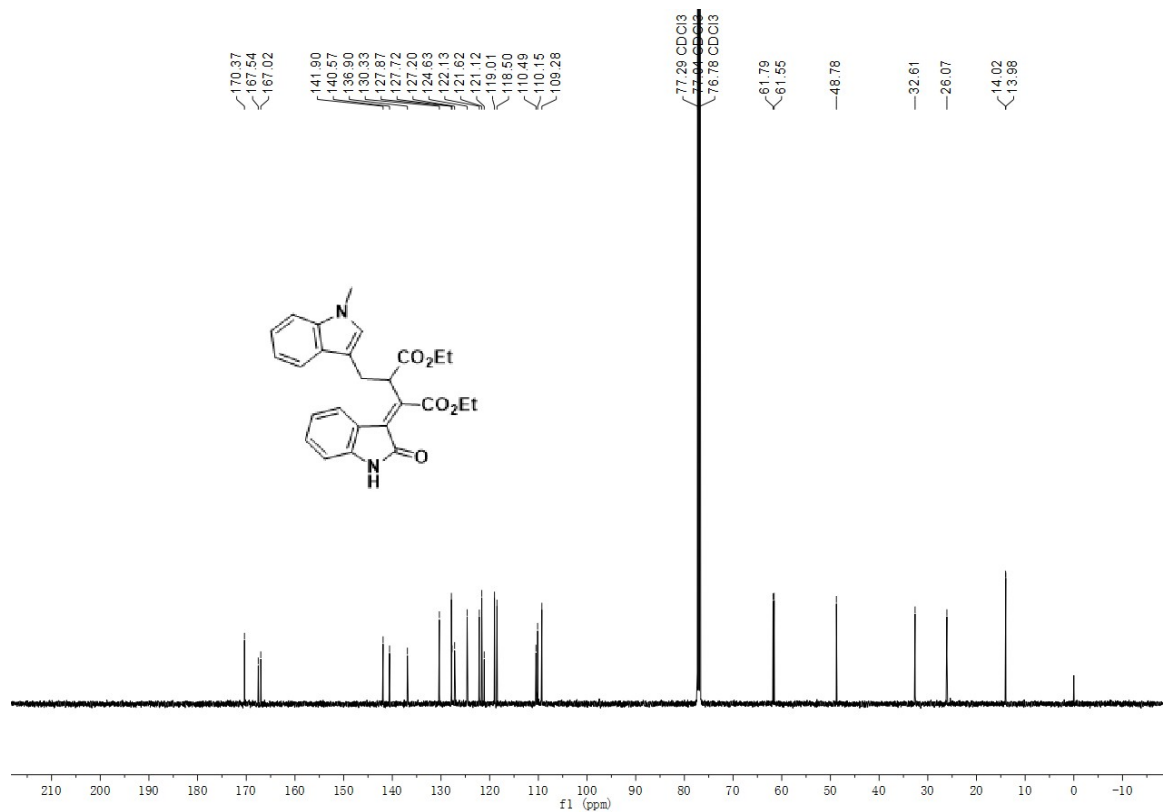

3b <sup>1</sup>H NMR (500 MHz, CDCl<sub>3</sub>) and <sup>13</sup>C NMR (125 MHz, CDCl<sub>3</sub>)



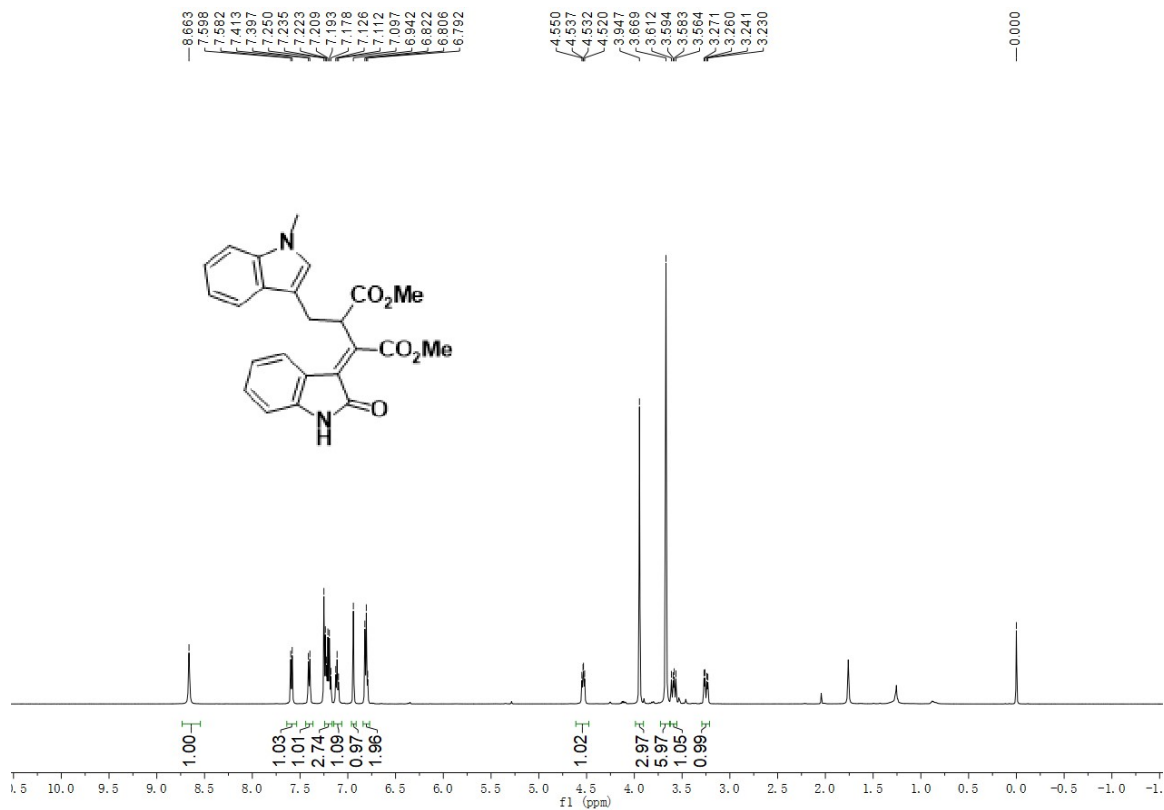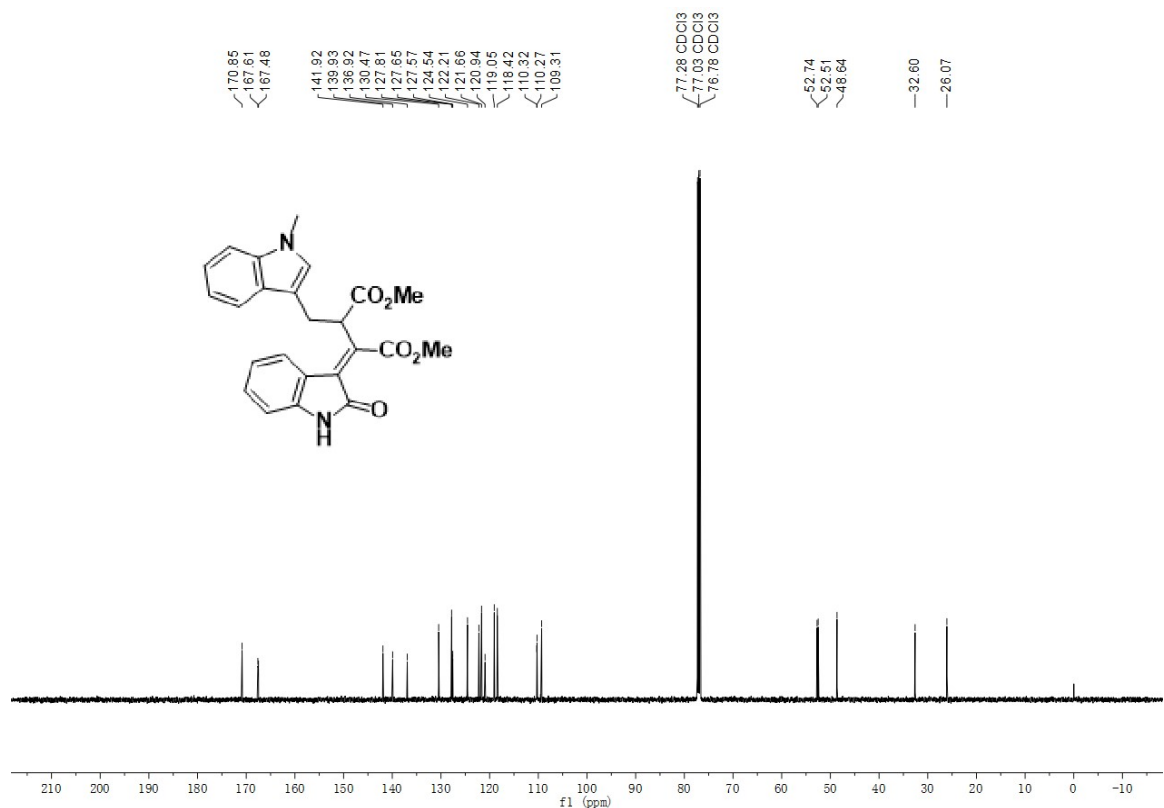

**3c <sup>1</sup>H NMR (500 MHz, CDCl<sub>3</sub>), <sup>13</sup>C NMR (125 MHz, CDCl<sub>3</sub>)**

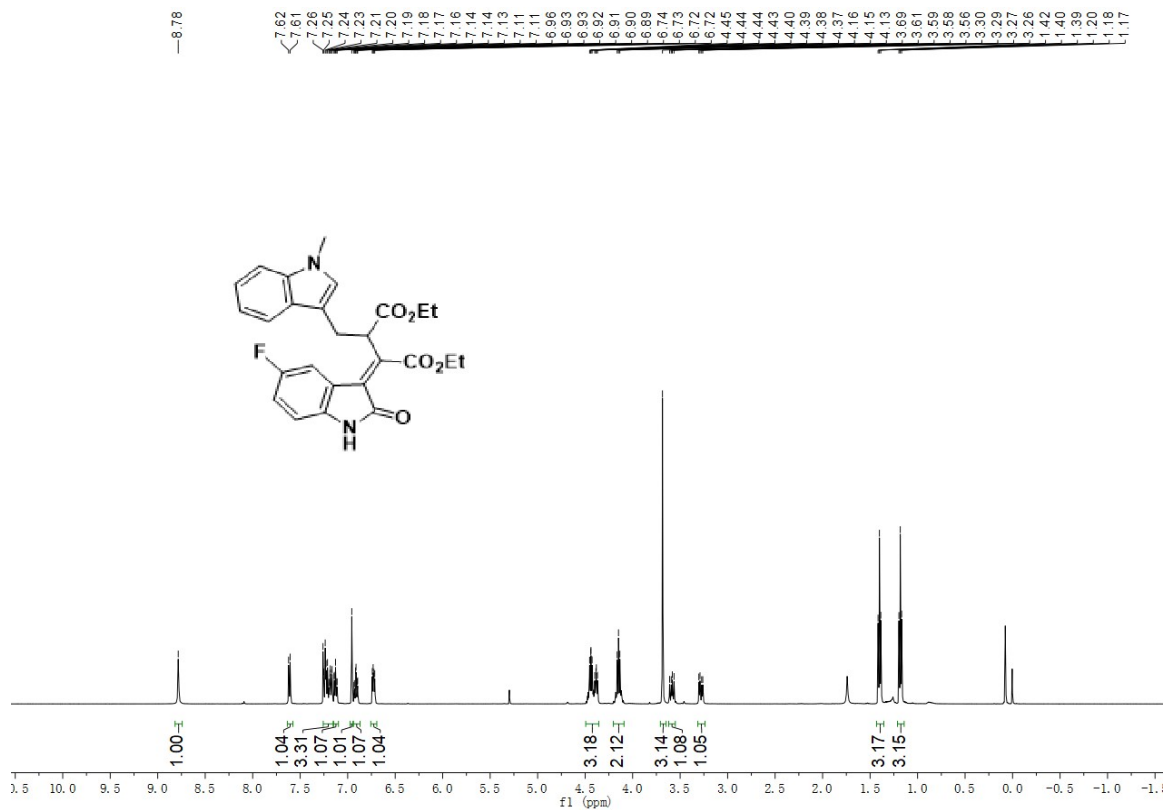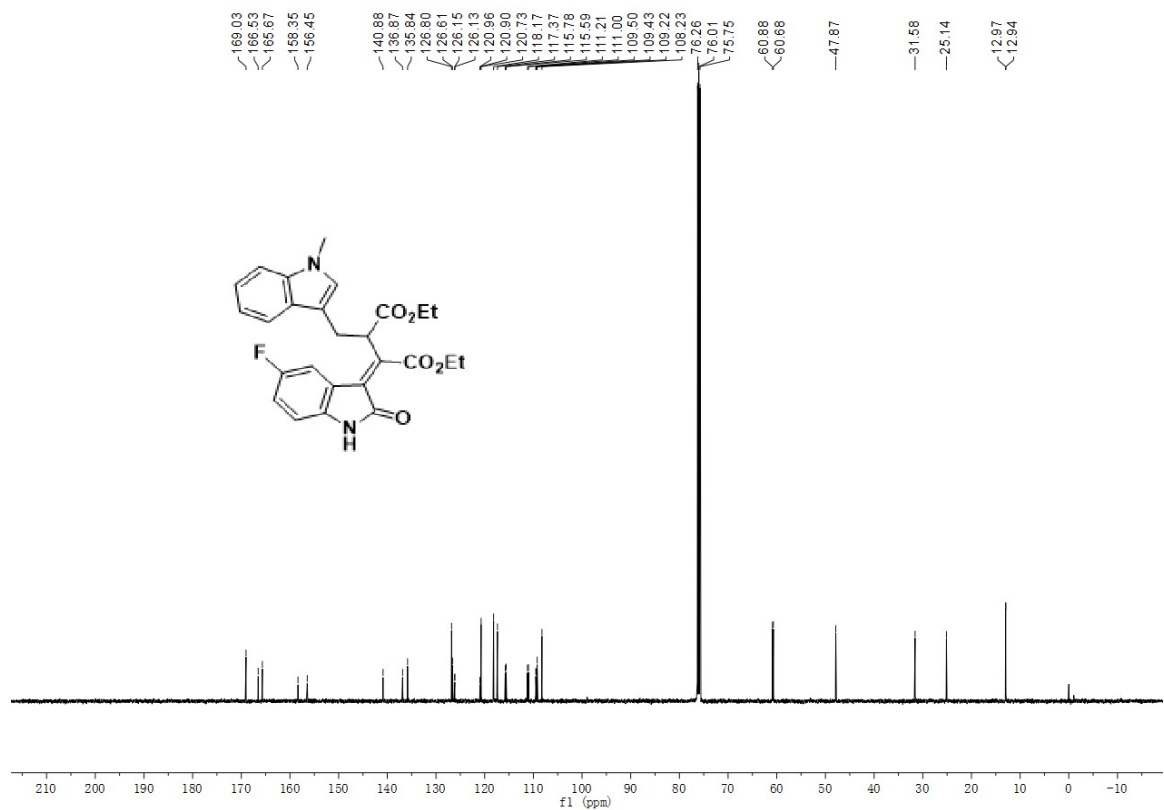

3d <sup>1</sup>H NMR (500 MHz, CDCl<sub>3</sub>) and <sup>13</sup>C NMR (125 MHz, CDCl<sub>3</sub>)

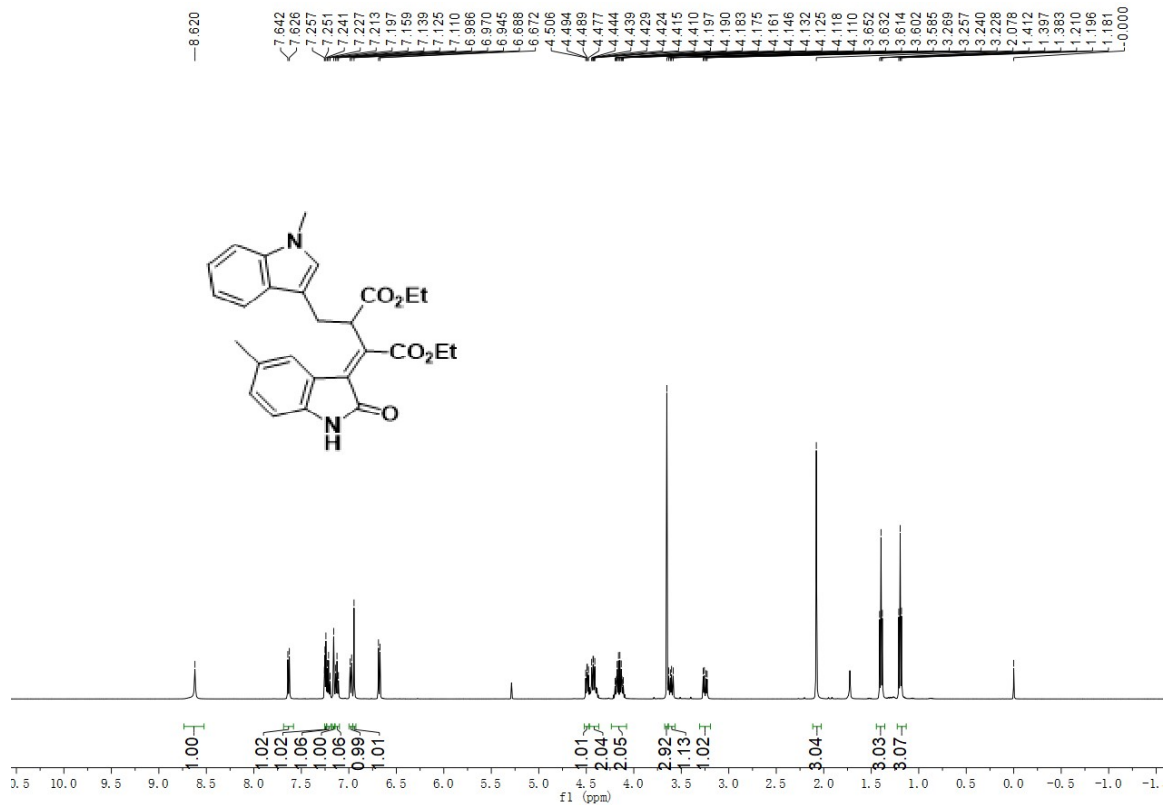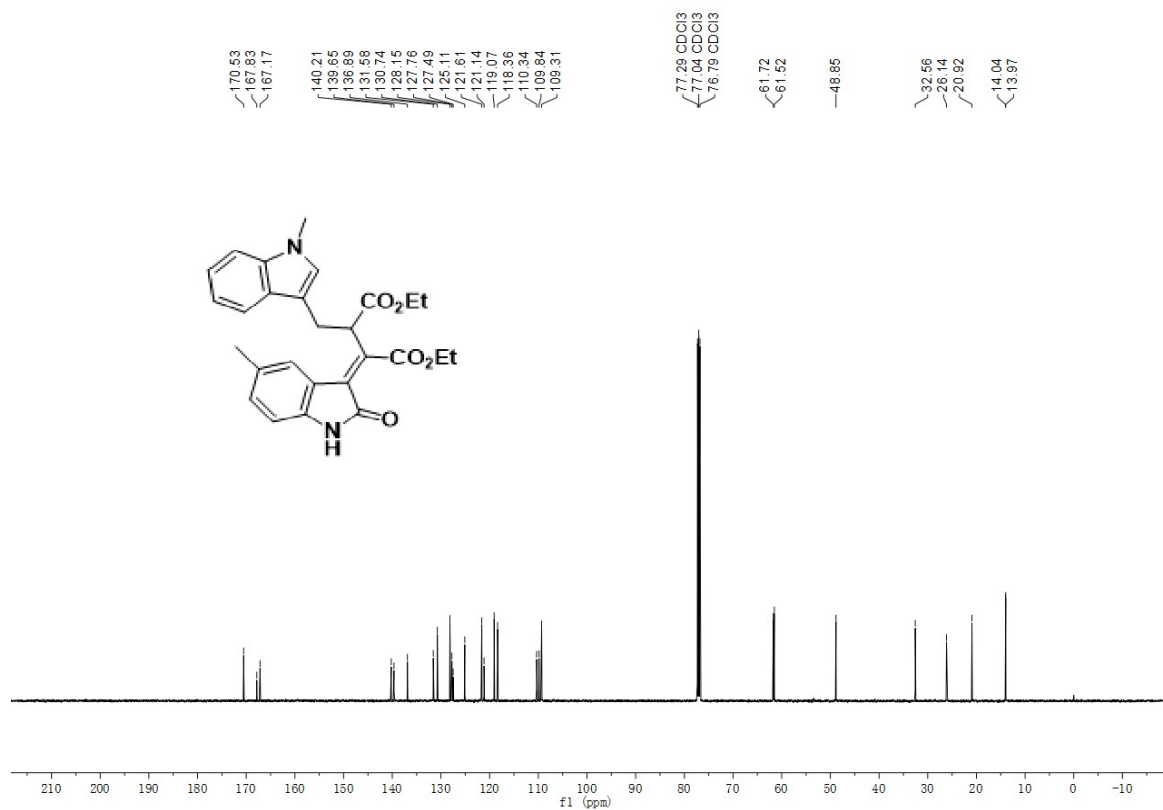

<sup>3e</sup> <sup>1</sup>H NMR (500 MHz, CDCl<sub>3</sub>) and <sup>13</sup>C NMR (125 MHz, CDCl<sub>3</sub>)

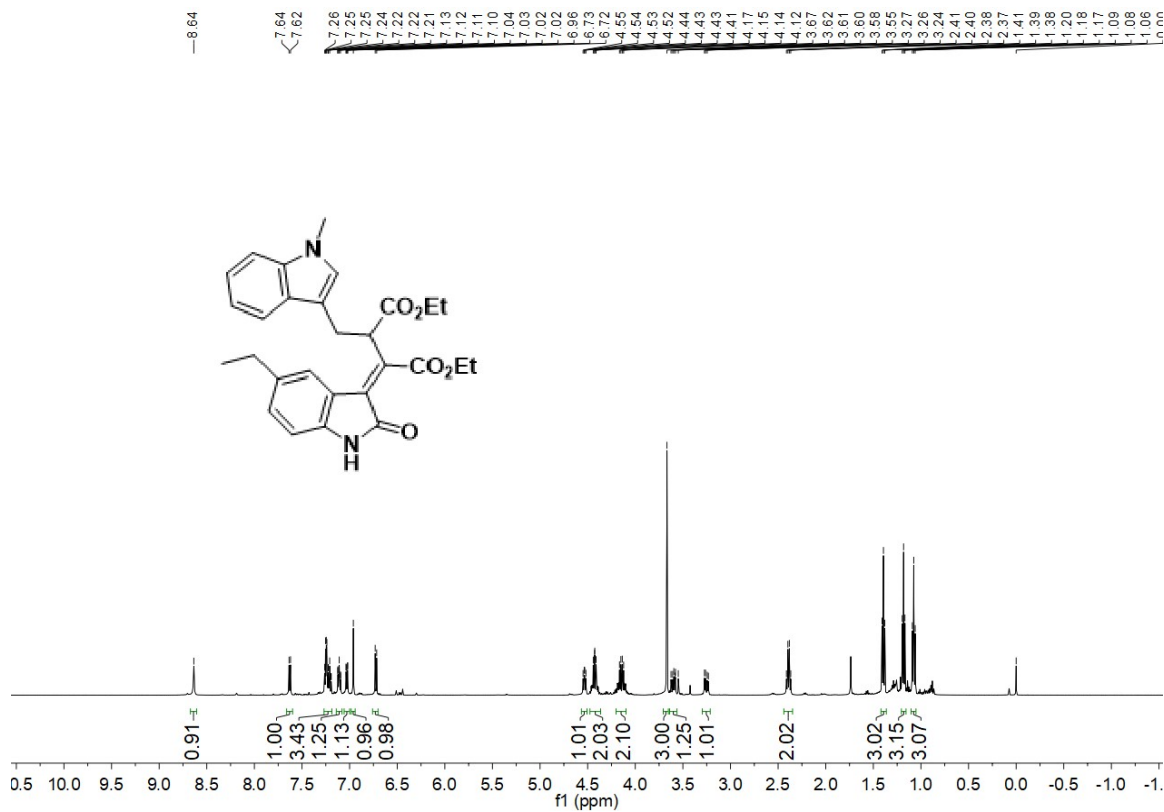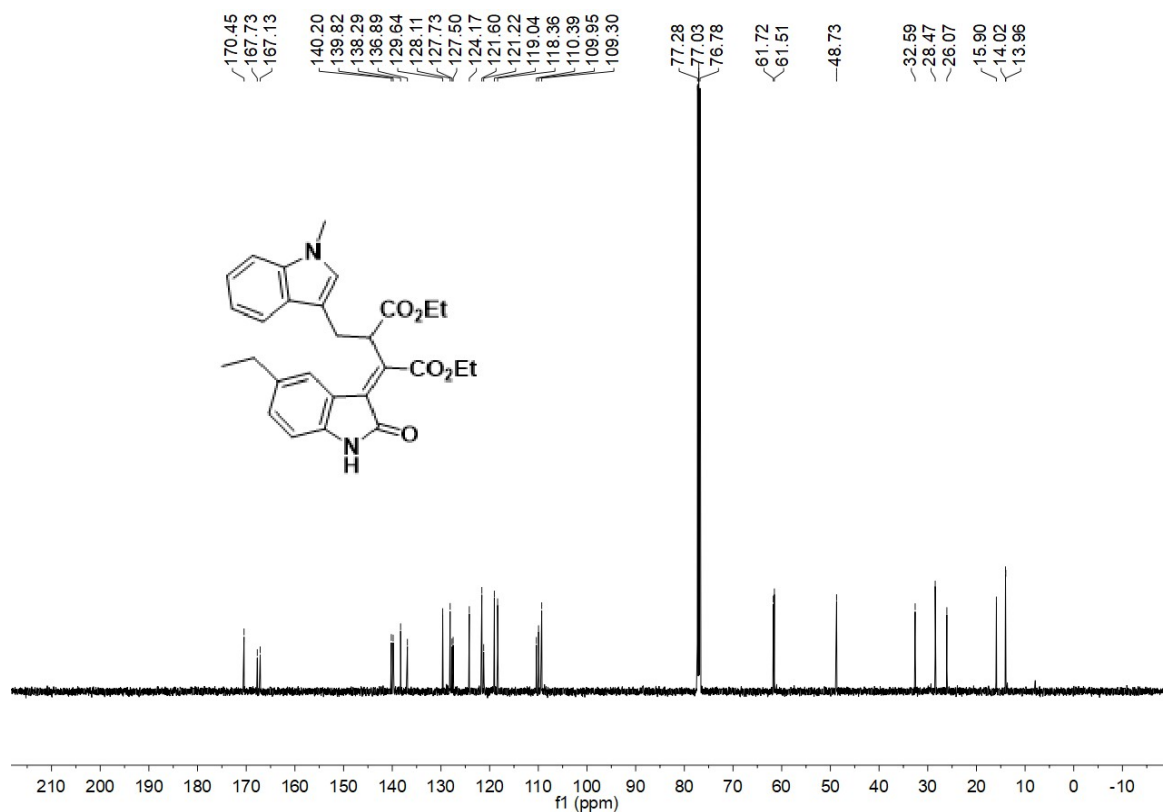

3f <sup>1</sup>H NMR (500 MHz, CDCl<sub>3</sub>) and <sup>13</sup>C NMR (125 MHz, CDCl<sub>3</sub>)

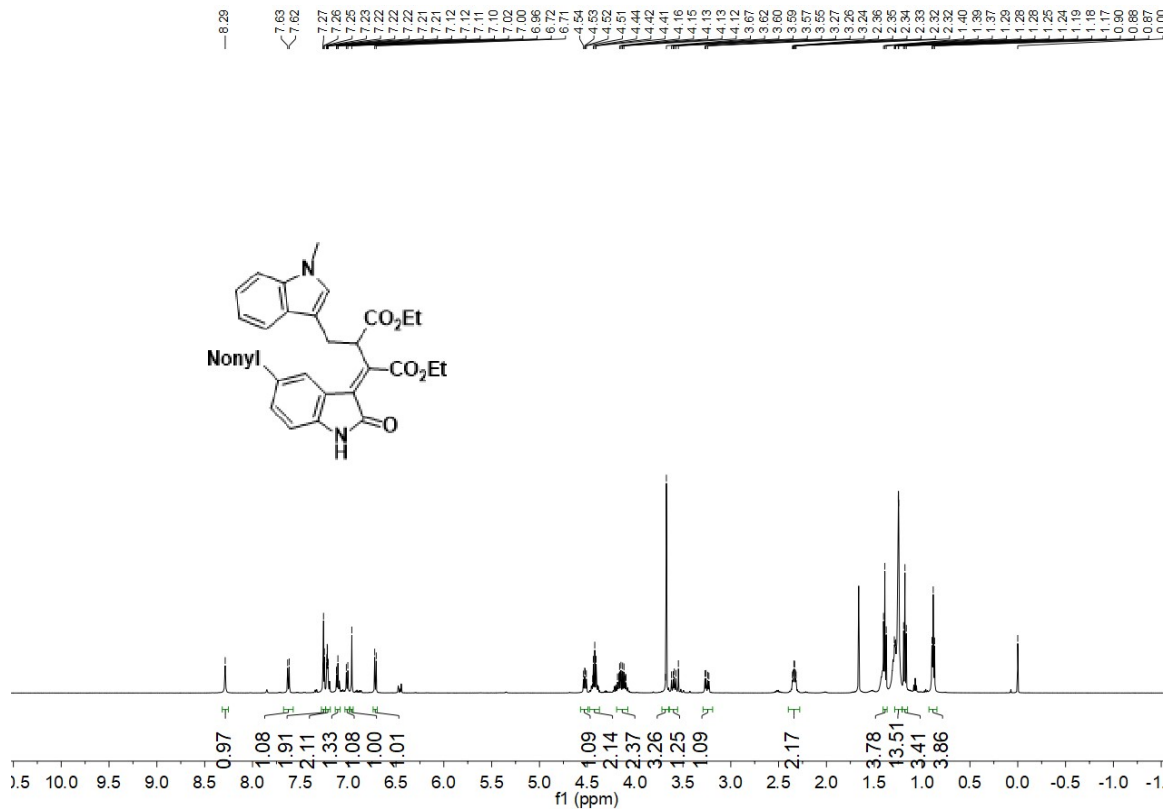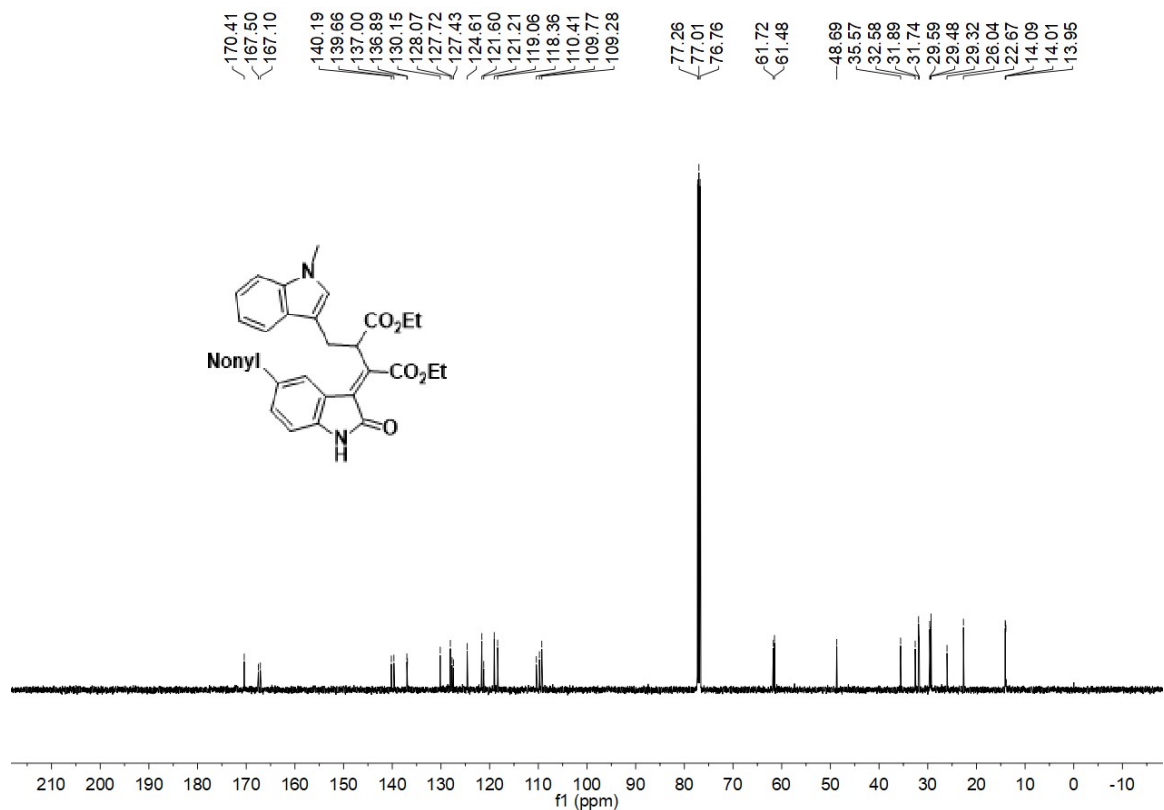

3g <sup>1</sup>H NMR (500 MHz, CDCl<sub>3</sub>) and <sup>13</sup>C NMR (125 MHz, CDCl<sub>3</sub>)

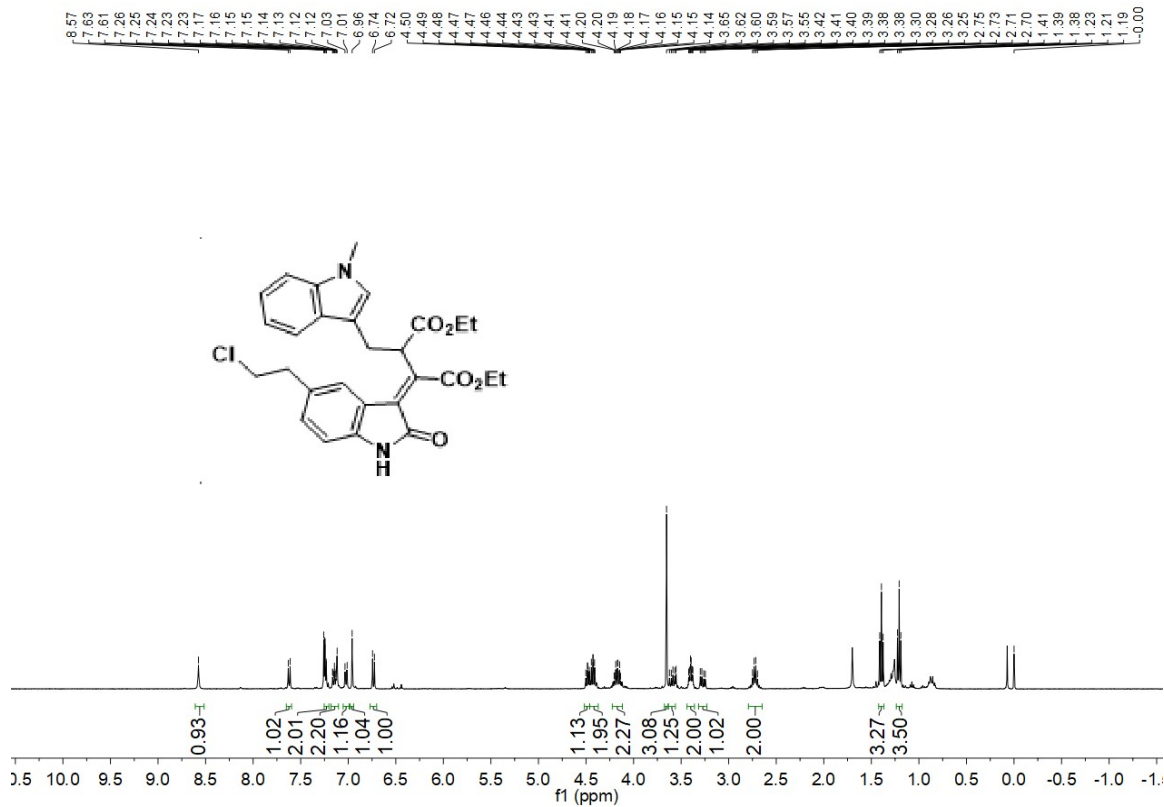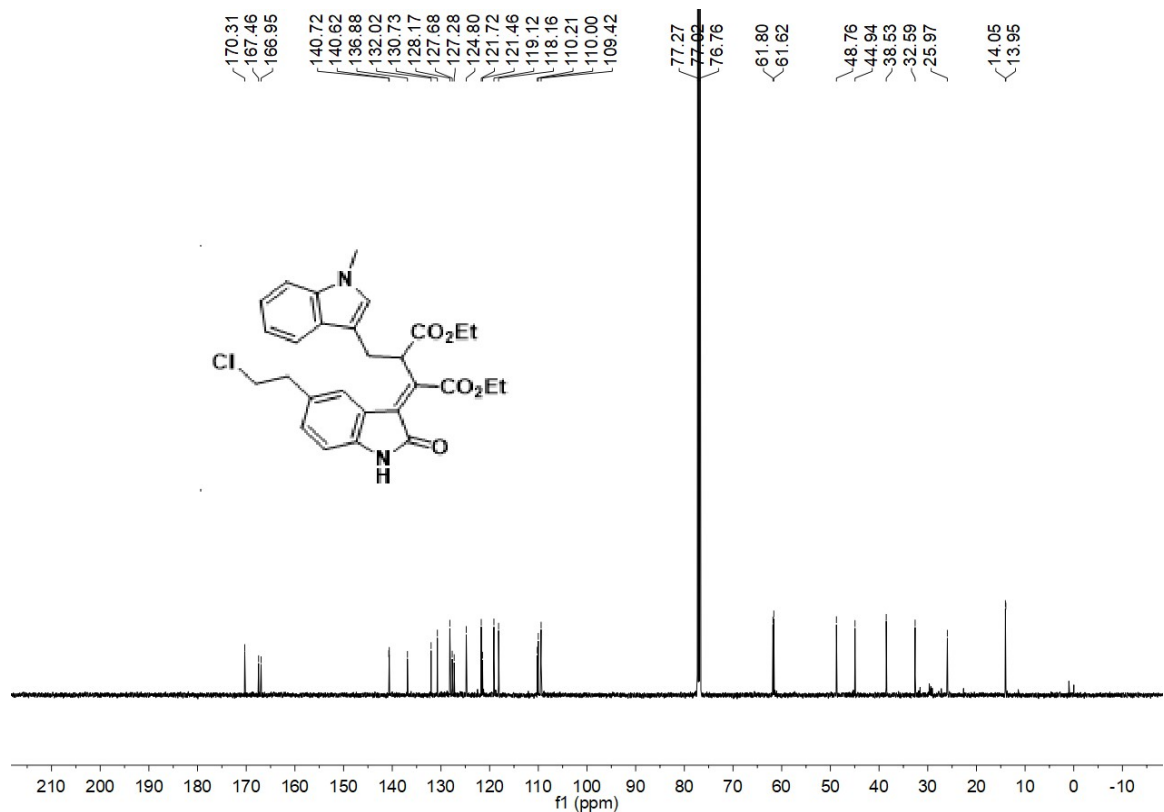

3h <sup>1</sup>H NMR (500 MHz, CDCl<sub>3</sub>) and <sup>13</sup>C NMR (125 MHz, CDCl<sub>3</sub>)

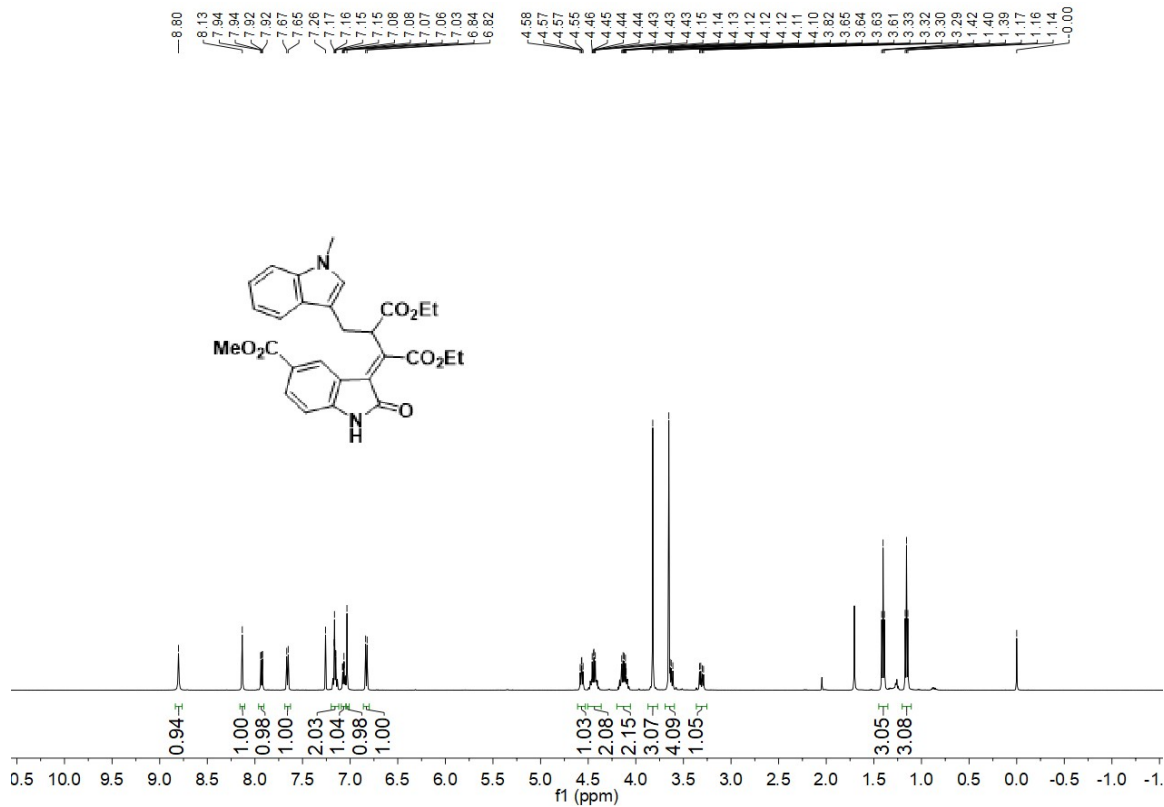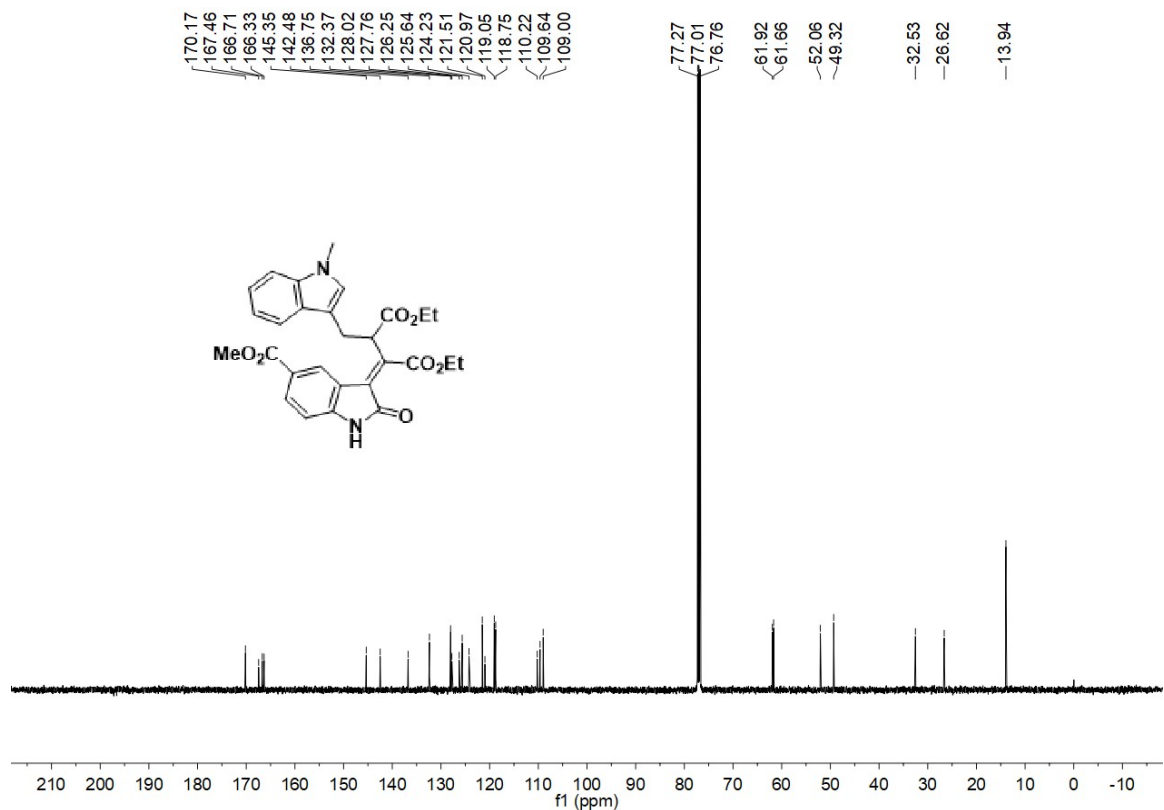

**<sup>31</sup>H NMR (500 MHz, CDCl<sub>3</sub>) and <sup>13</sup>C NMR (125 MHz, CDCl<sub>3</sub>)**

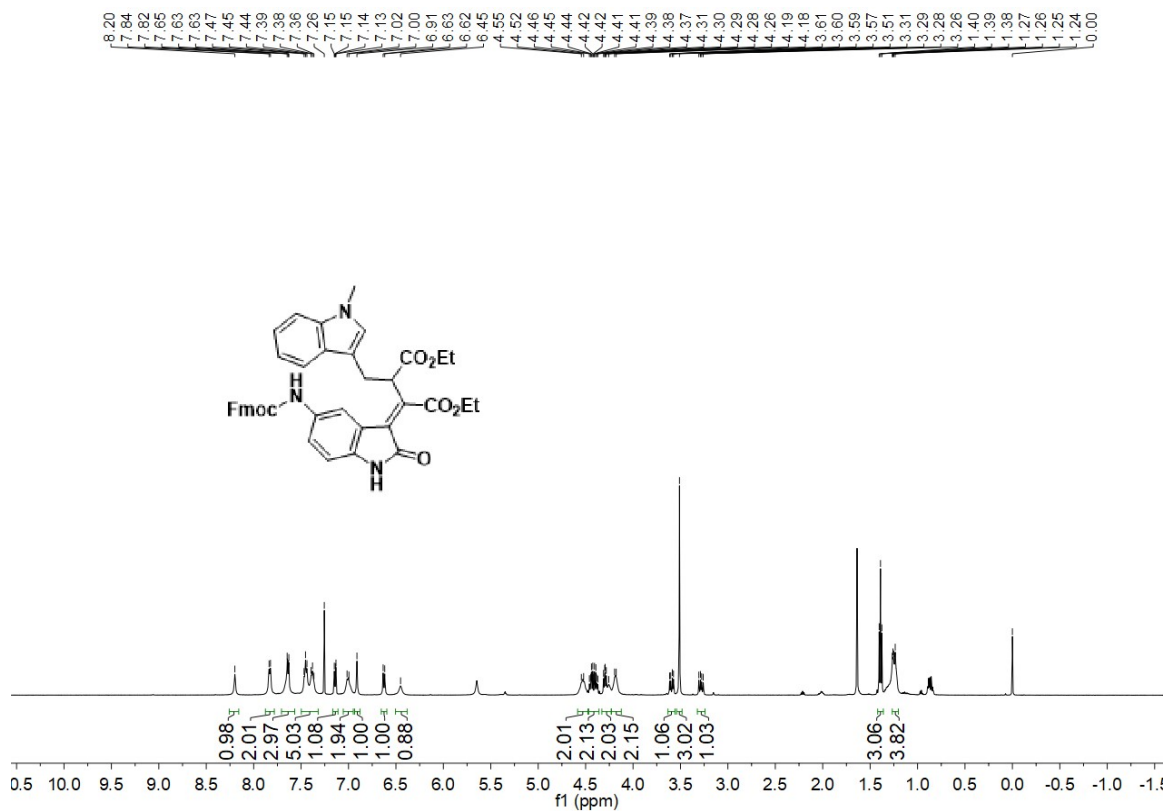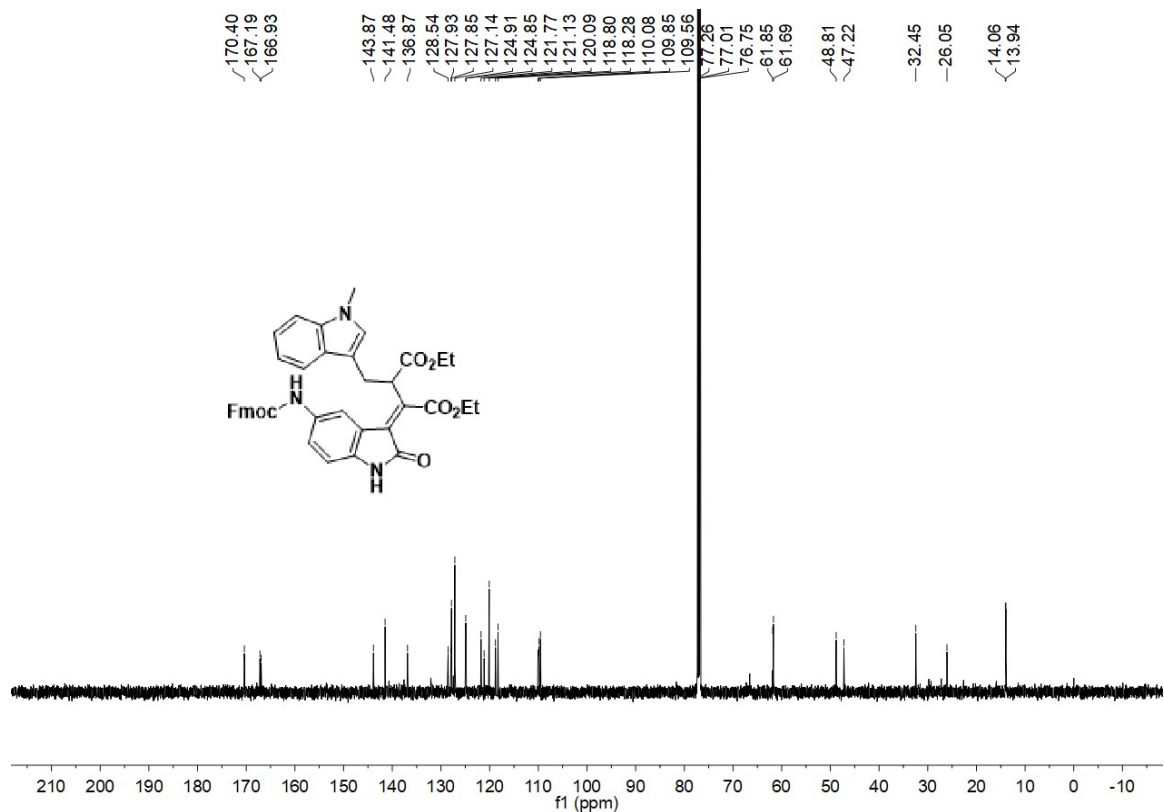

**<sup>3</sup>j <sup>1</sup>H NMR (500 MHz, CDCl<sub>3</sub>) and <sup>13</sup>C NMR (125 MHz, CDCl<sub>3</sub>)**



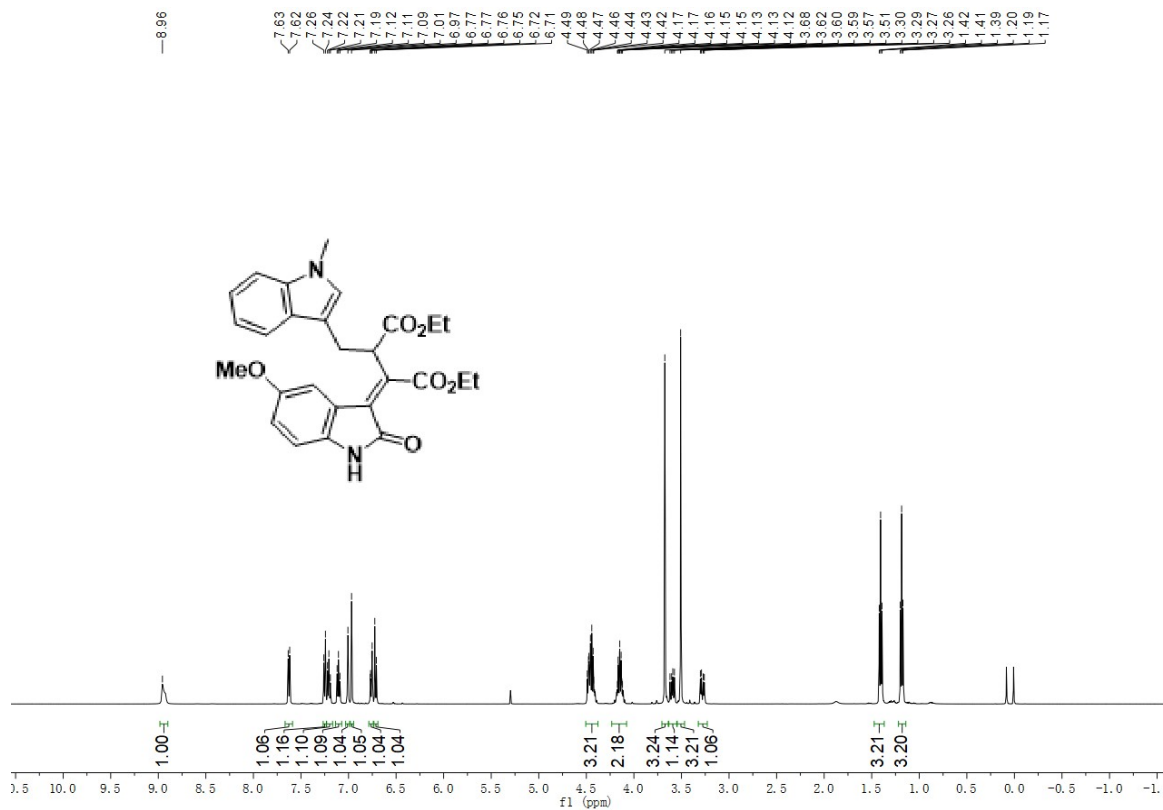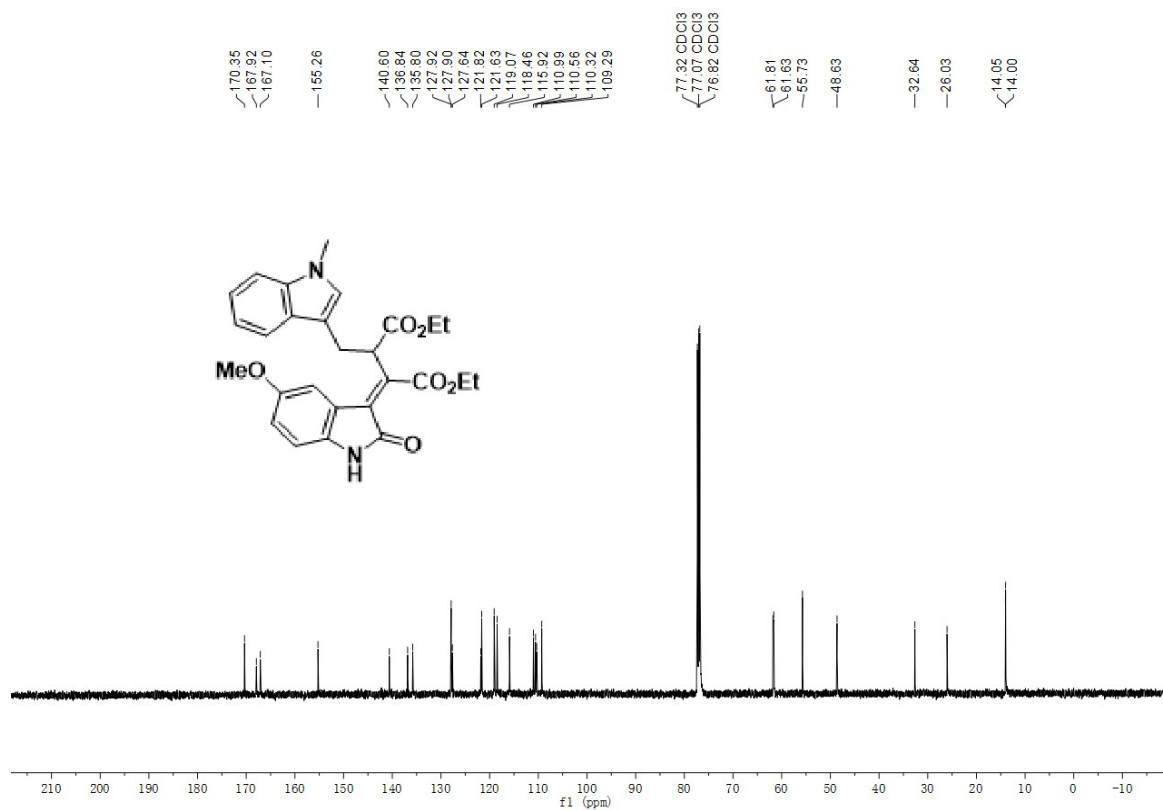

3k <sup>1</sup>H NMR (500 MHz, CDCl<sub>3</sub>) and <sup>13</sup>C NMR (125 MHz, CDCl<sub>3</sub>)

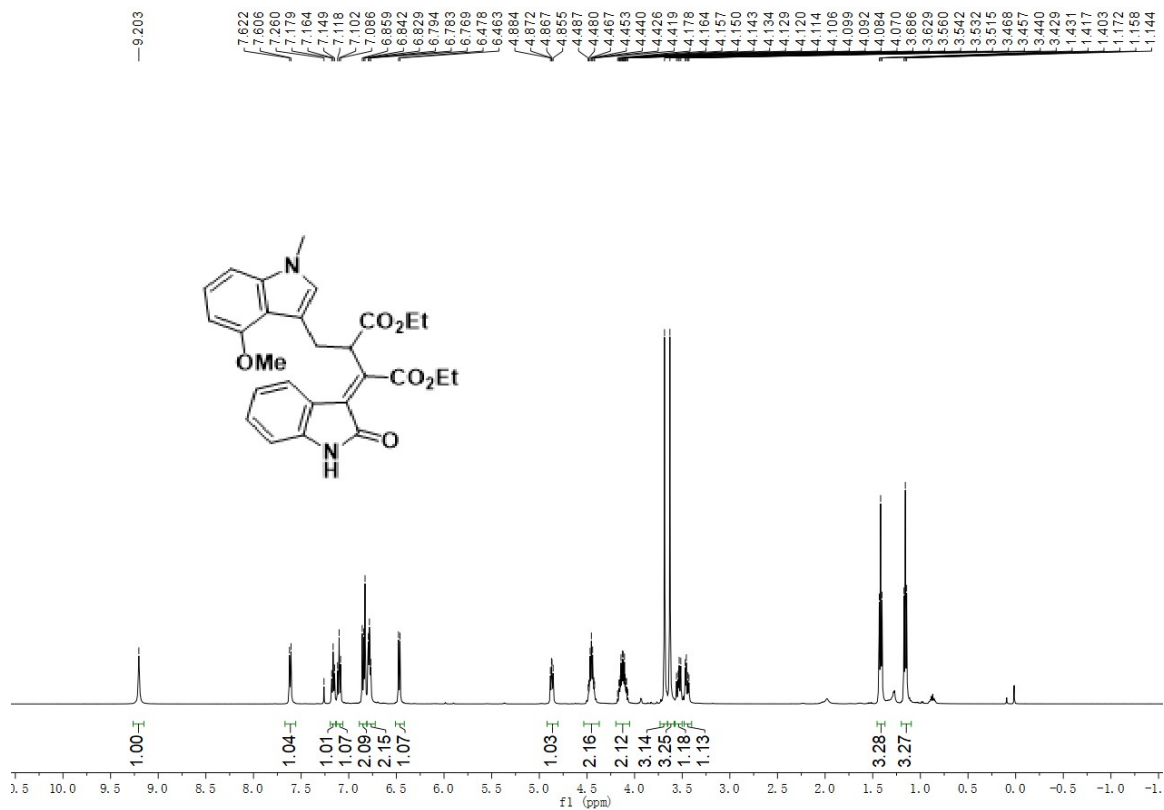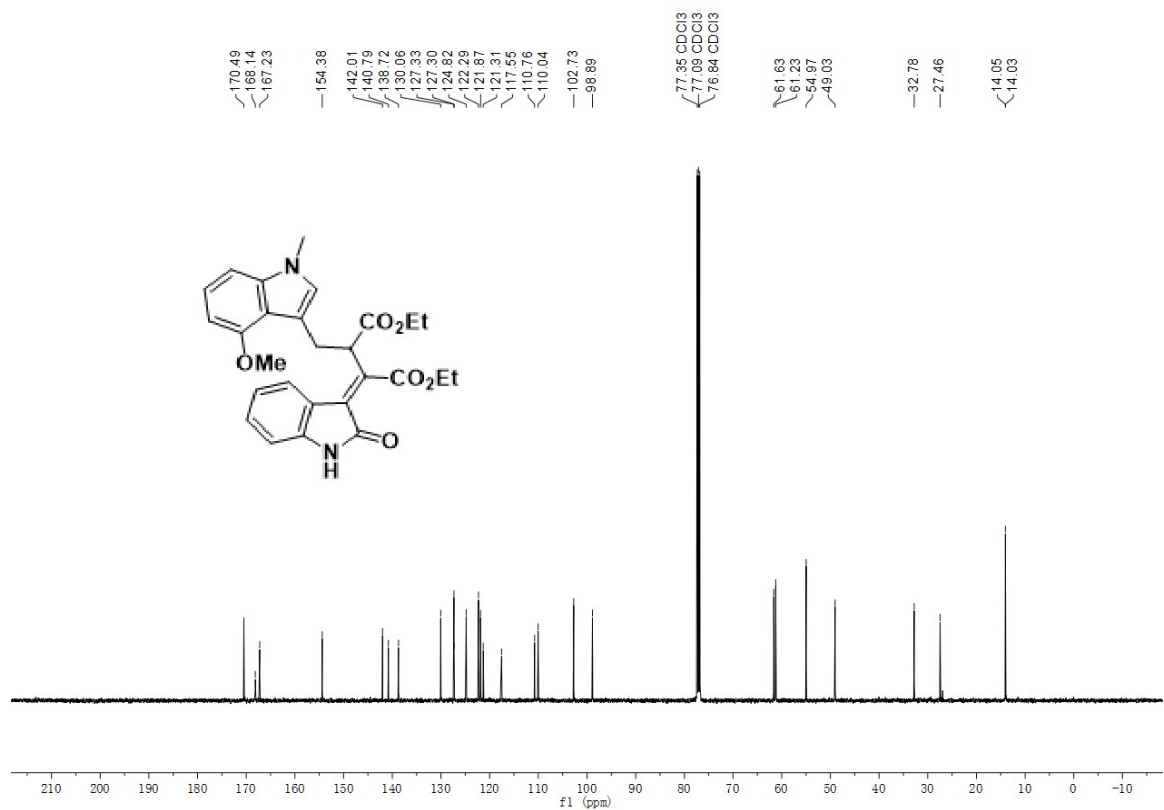

31 <sup>1</sup>H NMR (500 MHz, CDCl<sub>3</sub>) and <sup>13</sup>C NMR (125 MHz, CDCl<sub>3</sub>)

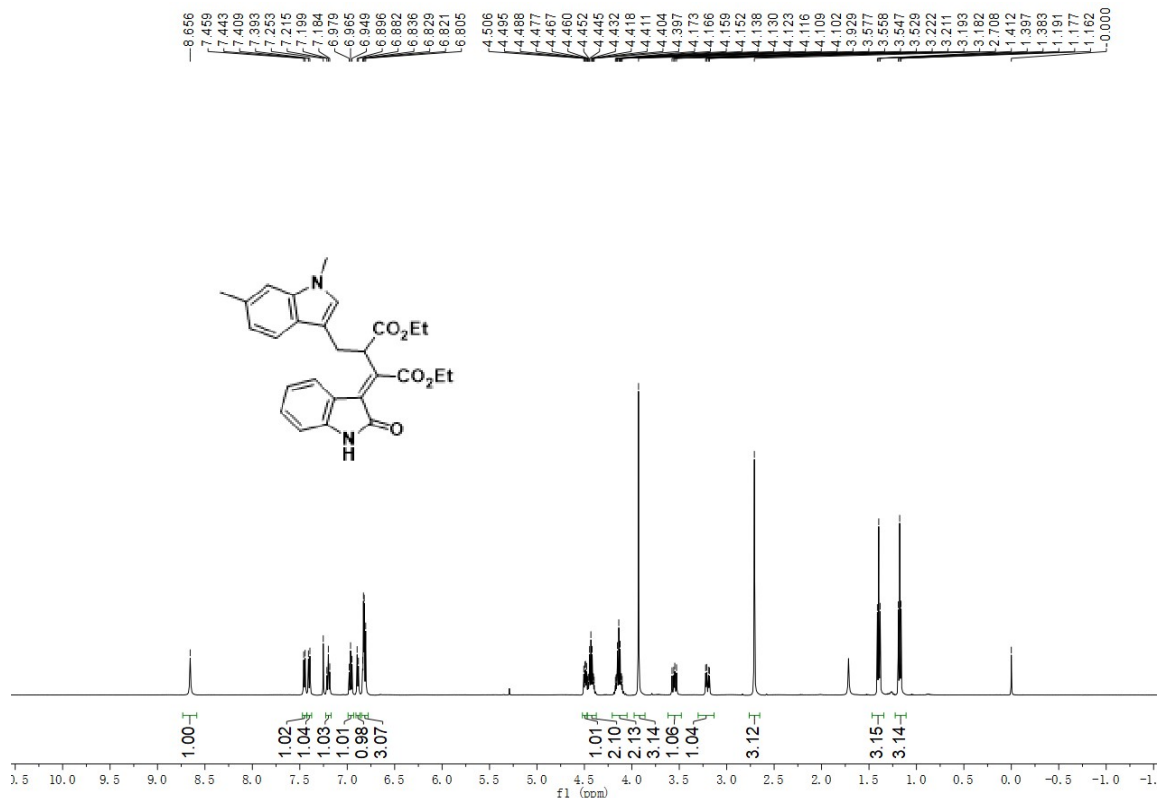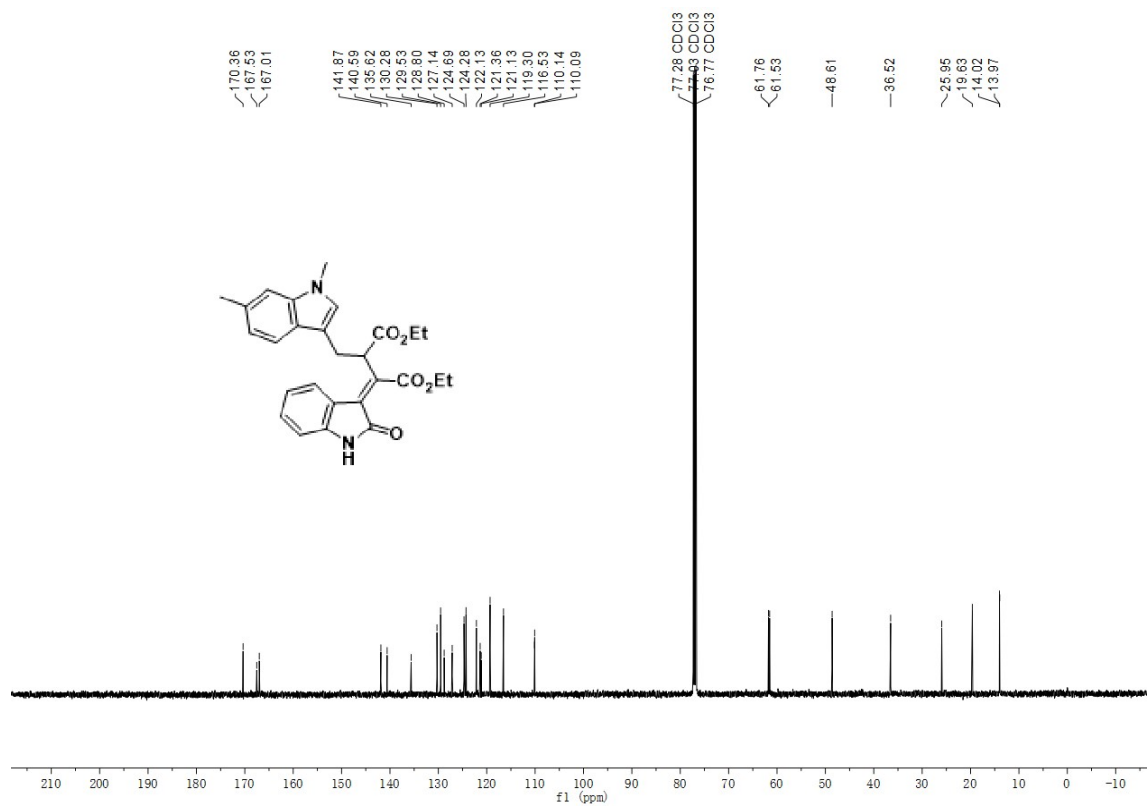

**3m <sup>1</sup>H NMR (500 MHz, CDCl<sub>3</sub>) and <sup>13</sup>C NMR (125 MHz, CDCl<sub>3</sub>)**

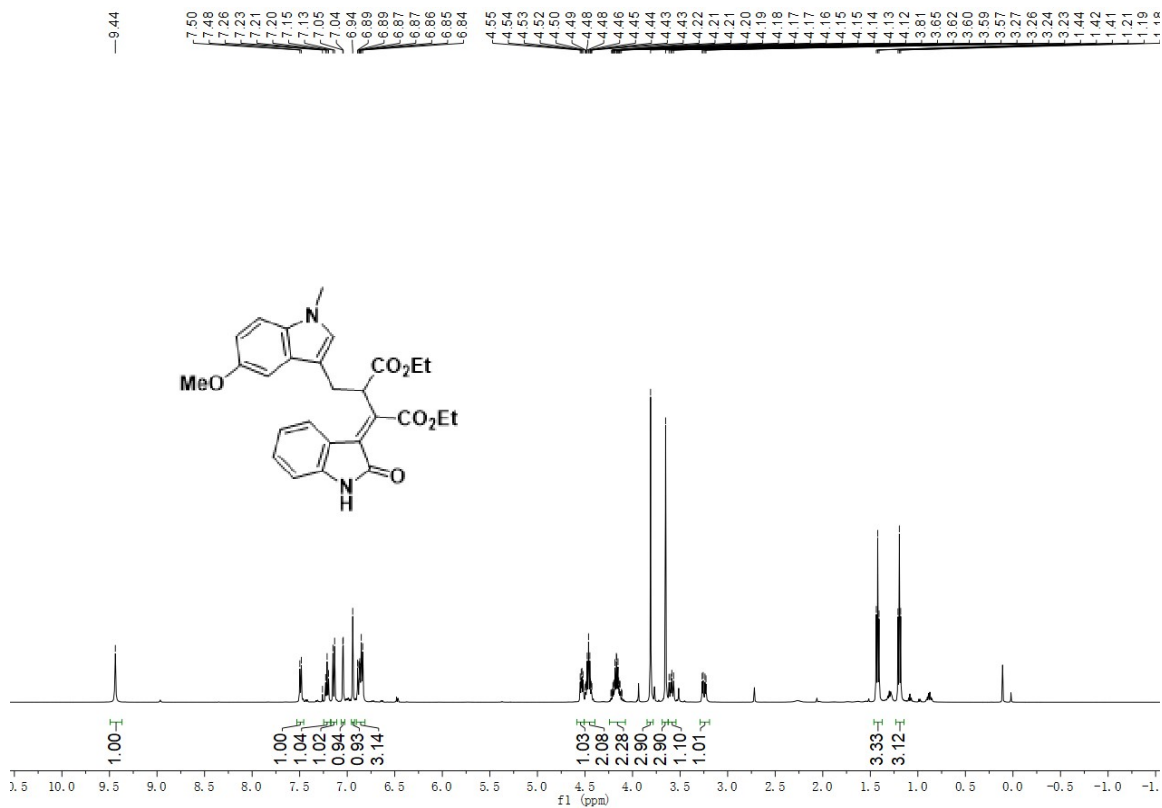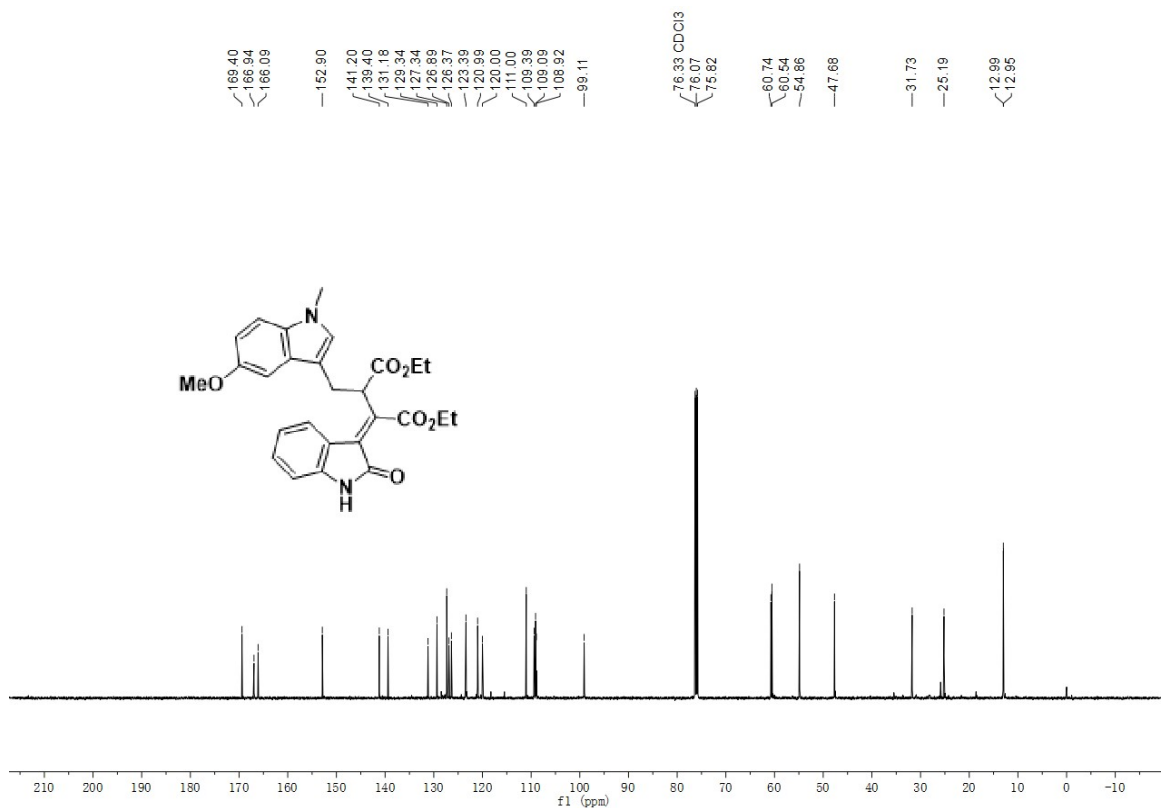

**3n**  $^1\text{H}$  NMR (500 MHz,  $\text{CDCl}_3$ ) and  $^{13}\text{C}$  NMR (125 MHz,  $\text{CDCl}_3$ )

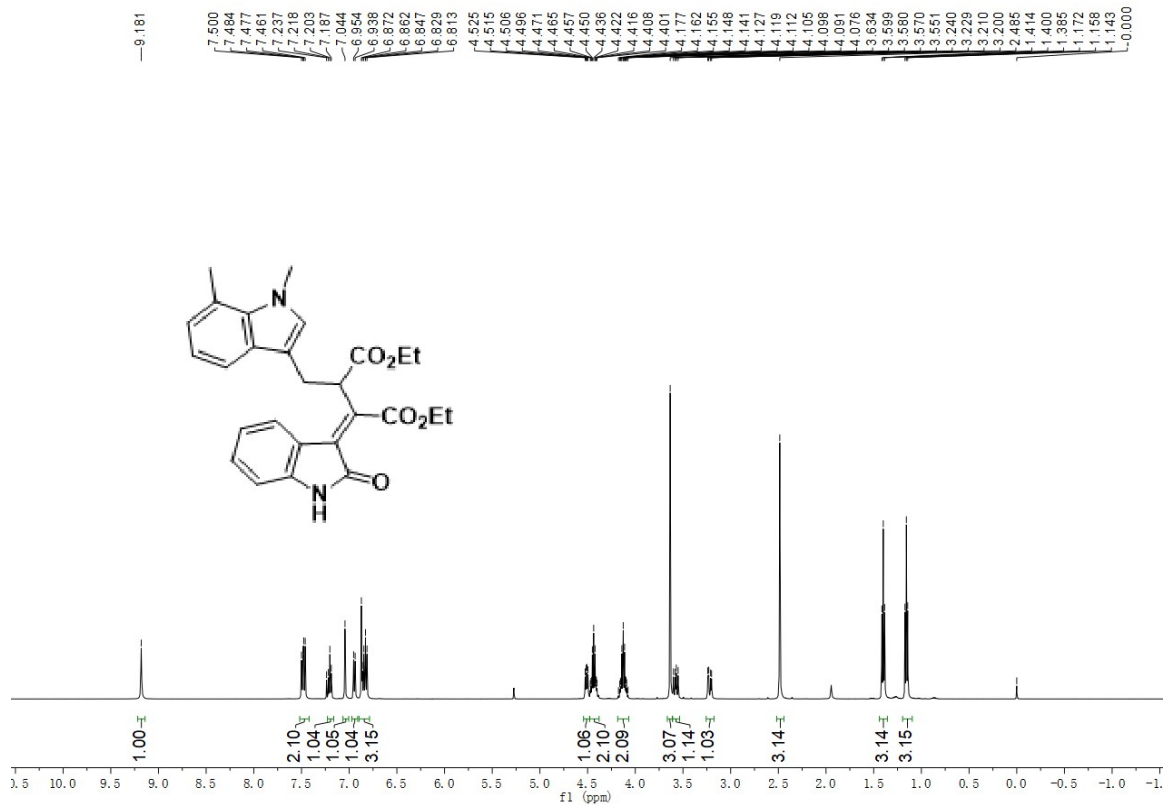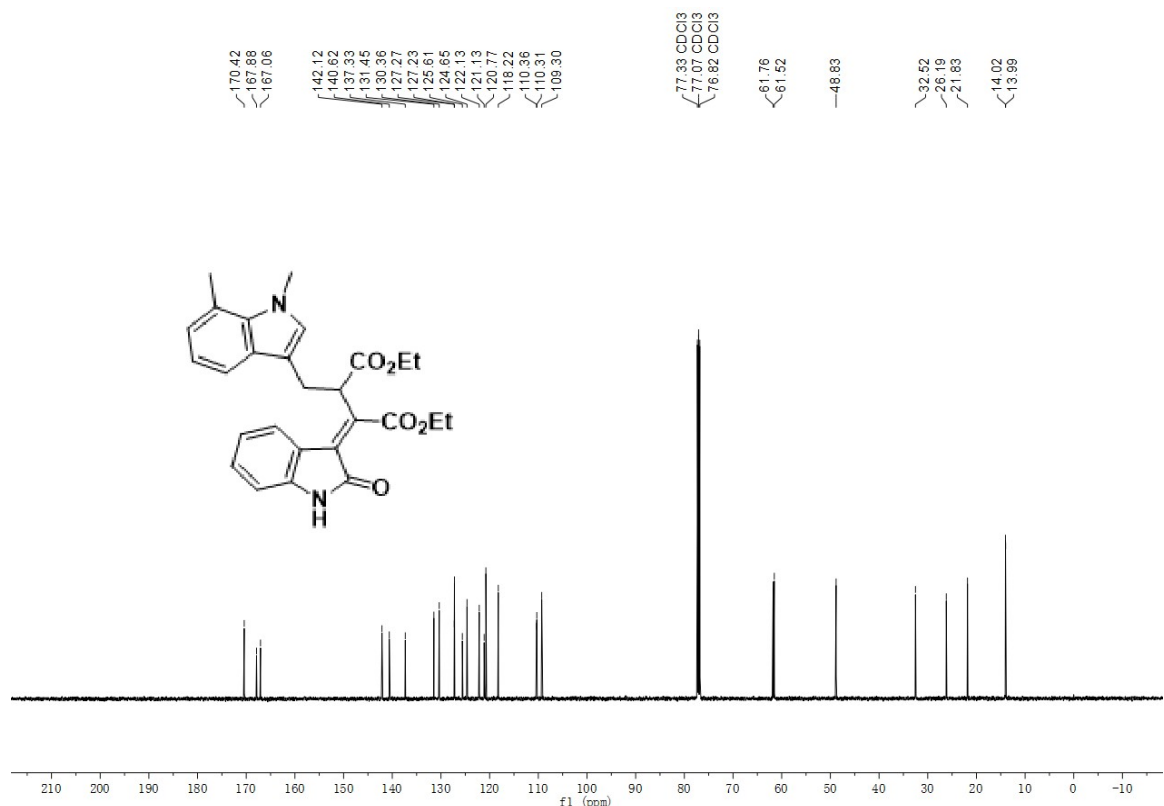

6 <sup>1</sup>H NMR (500 MHz, Actone-*d*<sub>6</sub>) and <sup>13</sup>C NMR (125 MHz, Actone-*d*<sub>6</sub>)

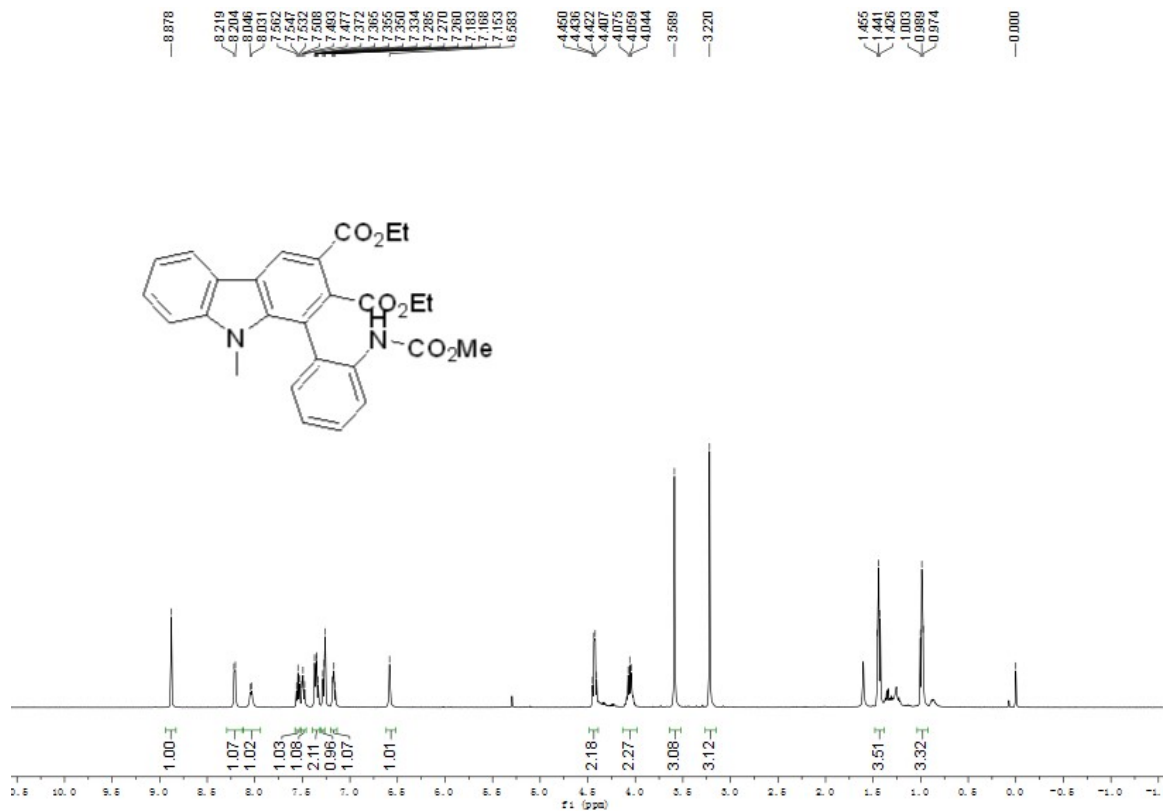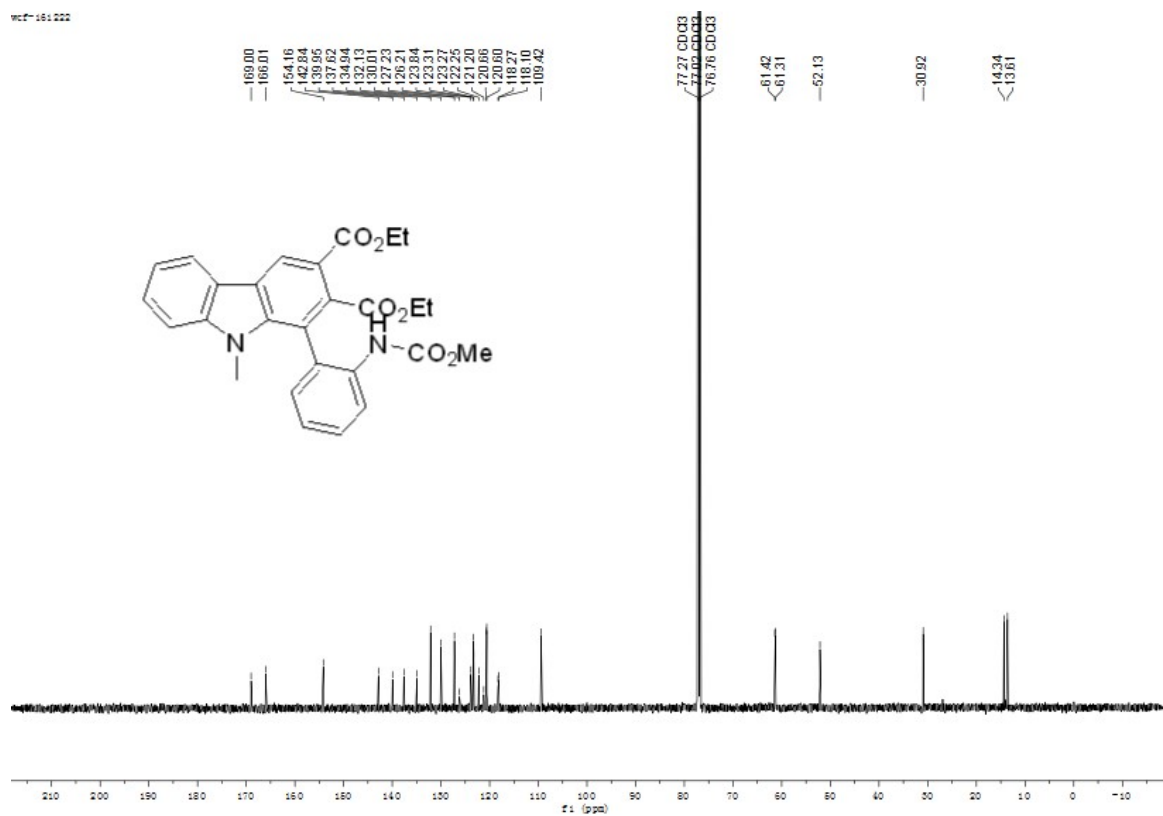

## 8. The HPLC of 2a and 3a

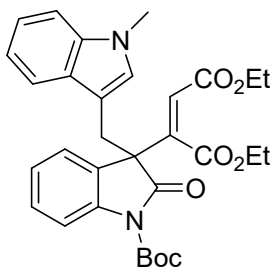

67% yield, 25% ee; Daicel Chiralpak IA-H, hexane/iso-propanol=90/10, flow rate 1.0 mL/min,  $t_1=13.06$  min,  $t_2=14.96$  min.

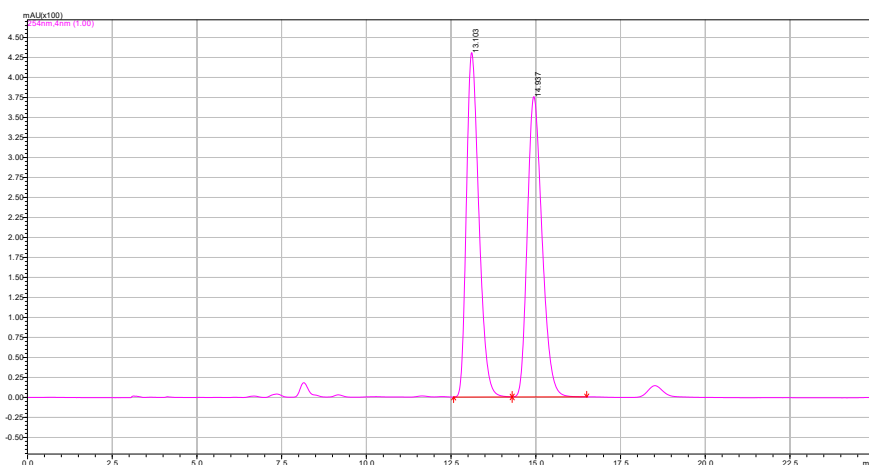

| Peak | Ret. Time | Area     | Height | Peak Start | Peak End | Area%   |
|------|-----------|----------|--------|------------|----------|---------|
| 1    | 13.103    | 11072964 | 430581 | 12.576     | 14.304   | 49.3677 |
| 2    | 14.937    | 11356587 | 375524 | 14.304     | 16.501   | 50.6323 |

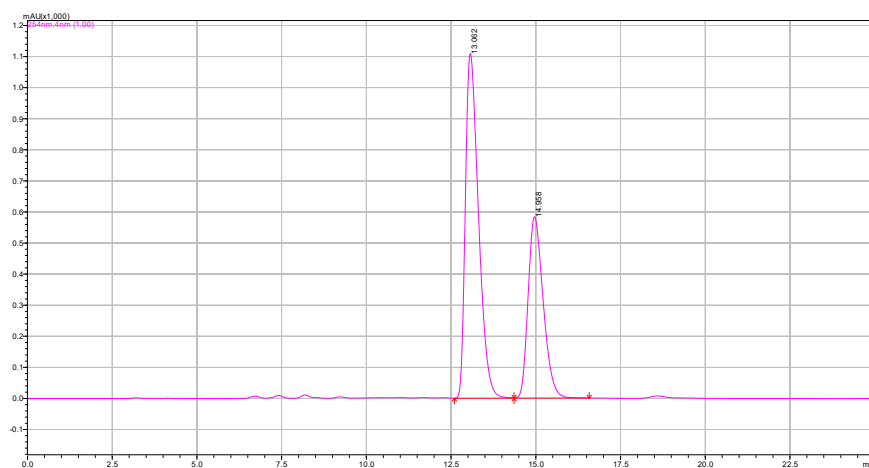

| Peak | Ret. Time | Area     | Height  | Peak Start | Peak End | Area%   |
|------|-----------|----------|---------|------------|----------|---------|
| 1    | 13.062    | 29825309 | 1109767 | 12.597     | 14.357   | 62.3568 |
| 2    | 14.958    | 18004750 | 583721  | 14.357     | 16.576   | 37.6432 |

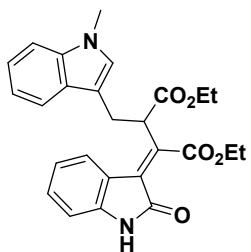

Daicel Chiralpak AD-H, hexane/iso-propanol=90/10, flow rate 1.0 mL/min

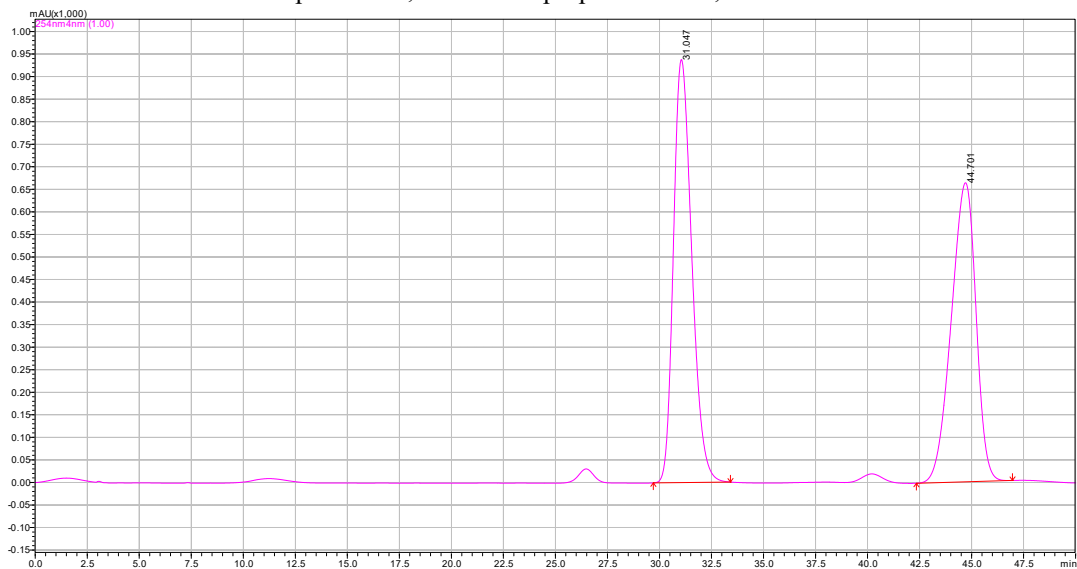

| Peak | Ret. Time | Area     | Height | Peak Start | Peak End | Area%   |
|------|-----------|----------|--------|------------|----------|---------|
| 1    | 31.047    | 57522716 | 938217 | 29.707     | 34.408   | 51.2725 |
| 2    | 44.701    | 54667421 | 663128 | 42.347     | 46.965   | 48.7275 |

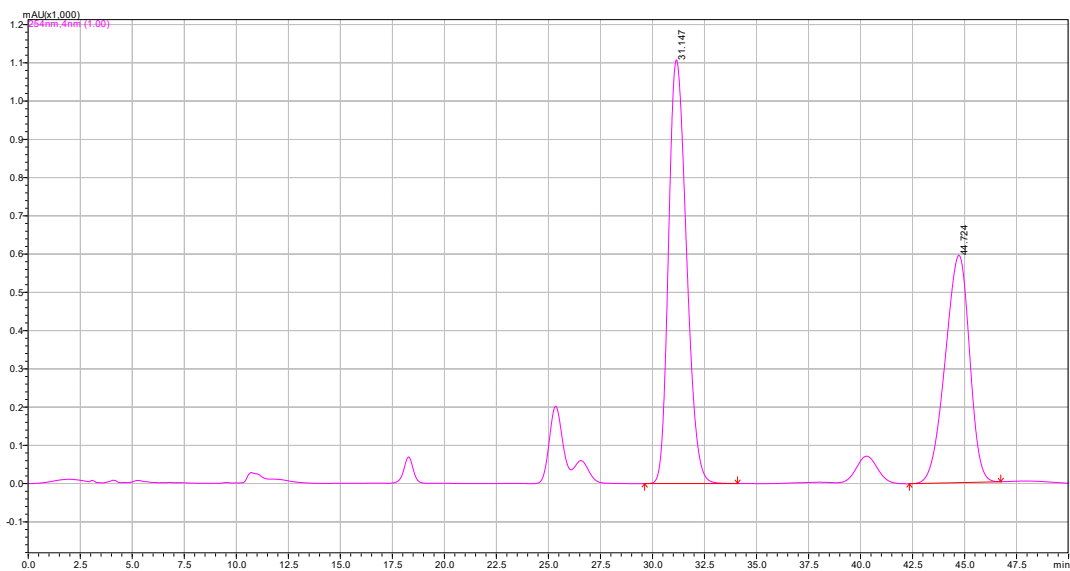

| Peak | Ret. Time | Area     | Height  | Peak Start | Peak End | Area%   |
|------|-----------|----------|---------|------------|----------|---------|
| 1    | 31.147    | 66506773 | 1107586 | 29.621     | 34.091   | 57.9196 |
| 2    | 44.724    | 48319172 | 594027  | 42.347     | 46.741   | 42.0804 |



## 9. X-ray Crystallographic Data for Product 3a

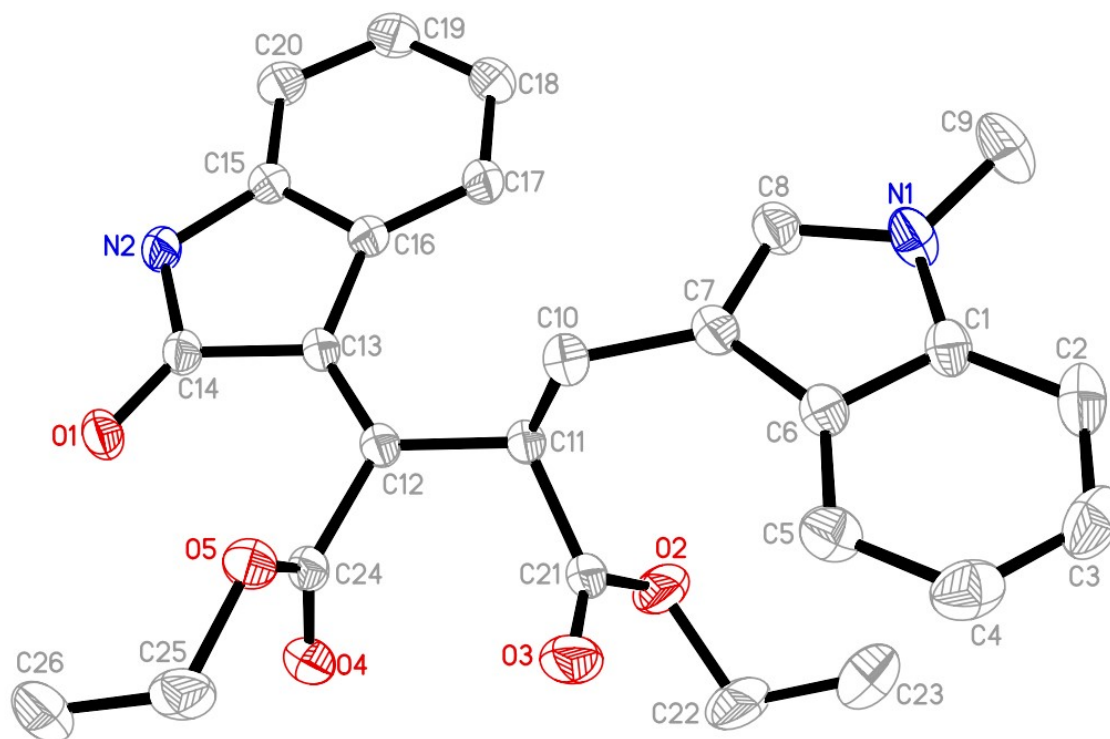

Figure 1. X-ray crystal structure of 3a

Table 1. Crystal data and structure refinement for mo\_20140522A\_0m.

|                             |                                                                                                                     |
|-----------------------------|---------------------------------------------------------------------------------------------------------------------|
| Identification code         | mo_20140522a_0m                                                                                                     |
| Empirical formula           | C <sub>26</sub> H <sub>26</sub> N <sub>2</sub> O <sub>5</sub>                                                       |
| Formula weight              | 446.49                                                                                                              |
| Temperature                 | 298(2) K                                                                                                            |
| Wavelength                  | 0.71073 Å                                                                                                           |
| Crystal system, space group | Monoclinic, P 2 <sub>1</sub> /c                                                                                     |
| Unit cell dimensions        | a = 9.084(4) Å    alpha = 90 deg.<br>b = 17.370(7) Å    beta = 95.273(6) deg.<br>c = 14.777(6) Å    gamma = 90 deg. |
| Volume                      | 2321.8(16) Å <sup>3</sup>                                                                                           |
| Z, Calculated density       | 4, 1.277 Mg/m <sup>3</sup>                                                                                          |

Absorption coefficient      0.089 mm<sup>-1</sup>  
F(000)                      944  
Crystal size                0.36 x 0.25 x 0.20 mm  
Theta range for data collection 2.54 to 25.50 deg.  
Limiting indices            -9<=h<=11, -21<=k<=21, -17<=l<=17  
Reflections collected / unique 13331 / 4279 [R(int) = 0.0196]  
Completeness to theta = 25.50 99.3 %  
Absorption correction      Semi-empirical from equivalents  
Max. and min. transmission 0.9824 and 0.9686  
Refinement method        Full-matrix least-squares on F<sup>2</sup>  
Data / restraints / parameters 4279 / 0 / 301  
Goodness-of-fit on F<sup>2</sup>      1.047  
Final R indices [I>2sigma(I)] R1 = 0.0506, wR2 = 0.1629  
R indices (all data)        R1 = 0.0661, wR2 = 0.1857  
Largest diff. peak and hole 0.507 and -0.301 e.A<sup>-3</sup>

Table 2. Atomic coordinates ( $\times 10^4$ ) and equivalent isotropic displacement parameters ( $\text{\AA}^2 \times 10^3$ ) for mo\_20140522A\_0m.  $U(\text{eq})$  is defined as one third of the trace of the orthogonalized  $U_{ij}$  tensor.

| x     | y        | z        | U(eq)   |        |
|-------|----------|----------|---------|--------|
| O(1)  | 8242(2)  | 10457(1) | 4367(1) | 49(1)  |
| O(2)  | 3637(2)  | 9403(1)  | 1279(1) | 76(1)  |
| O(3)  | 2838(2)  | 10372(1) | 2122(1) | 66(1)  |
| O(4)  | 5998(2)  | 10933(1) | 2607(1) | 51(1)  |
| O(5)  | 5004(2)  | 10972(1) | 3955(1) | 48(1)  |
| N(1)  | 750(2)   | 7458(1)  | 2594(1) | 54(1)  |
| N(2)  | 8923(2)  | 9189(1)  | 4674(1) | 44(1)  |
| C(1)  | -179(2)  | 8062(1)  | 2304(1) | 44(1)  |
| C(2)  | -1565(3) | 8044(2)  | 1802(2) | 61(1)  |
| C(3)  | -2263(3) | 8746(2)  | 1623(2) | 68(1)  |
| C(4)  | -1629(3) | 9436(2)  | 1934(2) | 66(1)  |
| C(5)  | -240(2)  | 9456(1)  | 2424(2) | 53(1)  |
| C(6)  | 514(2)   | 8757(1)  | 2616(1) | 43(1)  |
| C(7)  | 1908(2)  | 8553(1)  | 3103(1) | 44(1)  |
| C(8)  | 1983(2)  | 7758(1)  | 3077(2) | 50(1)  |
| C(9)  | 434(3)   | 6640(1)  | 2446(2) | 72(1)  |
| C(10) | 3072(2)  | 9105(1)  | 3522(1) | 47(1)  |
| C(11) | 4246(2)  | 9320(1)  | 2858(1) | 38(1)  |
| C(12) | 5549(2)  | 9746(1)  | 3364(1) | 37(1)  |
| C(13) | 6661(2)  | 9358(1)  | 3832(1) | 37(1)  |
| C(14) | 8002(2)  | 9756(1)  | 4312(1) | 39(1)  |
| C(15) | 8346(2)  | 8452(1)  | 4449(1) | 40(1)  |
| C(16) | 6953(2)  | 8522(1)  | 3952(1) | 37(1)  |
| C(17) | 6198(2)  | 7846(1)  | 3675(1) | 44(1)  |
| C(18) | 6839(3)  | 7130(1)  | 3887(2) | 53(1)  |
| C(19) | 8223(3)  | 7084(1)  | 4370(2) | 55(1)  |
| C(20) | 9004(2)  | 7743(1)  | 4663(2) | 51(1)  |
| C(21) | 3499(2)  | 9775(1)  | 2059(1) | 47(1)  |
| C(22) | 2808(6)  | 9718(2)  | 456(2)  | 124(2) |
| C(23) | 1672(6)  | 9209(3)  | 103(3)  | 135(2) |
| C(24) | 5580(2)  | 10618(1) | 3266(1) | 39(1)  |
| C(25) | 4856(3)  | 11813(1) | 3873(2) | 60(1)  |
| C(26) | 6276(4)  | 12224(1) | 4158(2) | 80(1)  |

Table 3. Bond lengths [Å] and angles [deg] for mo\_20140522A\_0m.

---

|              |          |
|--------------|----------|
| O(1)-C(14)   | 1.239(2) |
| O(2)-C(21)   | 1.338(3) |
| O(2)-C(22)   | 1.475(3) |
| O(3)-C(21)   | 1.206(3) |
| O(4)-C(24)   | 1.208(2) |
| O(5)-C(24)   | 1.337(2) |
| O(5)-C(25)   | 1.472(3) |
| N(1)-C(8)    | 1.375(3) |
| N(1)-C(1)    | 1.389(3) |
| N(1)-C(9)    | 1.462(3) |
| N(2)-C(14)   | 1.369(3) |
| N(2)-C(15)   | 1.411(2) |
| N(2)-H(2A)   | 0.8600   |
| C(1)-C(2)    | 1.403(3) |
| C(1)-C(6)    | 1.419(3) |
| C(2)-C(3)    | 1.387(4) |
| C(2)-H(2)    | 0.9300   |
| C(3)-C(4)    | 1.390(4) |
| C(3)-H(3)    | 0.9300   |
| C(4)-C(5)    | 1.396(4) |
| C(4)-H(4)    | 0.9300   |
| C(5)-C(6)    | 1.410(3) |
| C(5)-H(5)    | 0.9300   |
| C(6)-C(7)    | 1.443(3) |
| C(7)-C(8)    | 1.383(3) |
| C(7)-C(10)   | 1.516(3) |
| C(8)-H(8)    | 0.9300   |
| C(9)-H(9A)   | 0.9600   |
| C(9)-H(9B)   | 0.9600   |
| C(9)-H(9C)   | 0.9600   |
| C(10)-C(11)  | 1.559(3) |
| C(10)-H(10A) | 0.9700   |
| C(10)-H(10B) | 0.9700   |
| C(11)-C(21)  | 1.526(3) |
| C(11)-C(12)  | 1.531(2) |
| C(11)-H(11)  | 0.9800   |
| C(12)-C(13)  | 1.351(3) |
| C(12)-C(24)  | 1.523(3) |
| C(13)-C(16)  | 1.483(3) |
| C(13)-C(14)  | 1.519(2) |
| C(15)-C(20)  | 1.393(3) |
| C(15)-C(16)  | 1.408(3) |
| C(16)-C(17)  | 1.402(3) |
| C(17)-C(18)  | 1.396(3) |
| C(17)-H(17)  | 0.9300   |
| C(18)-C(19)  | 1.390(3) |
| C(18)-H(18)  | 0.9300   |
| C(19)-C(20)  | 1.394(3) |
| C(19)-H(19)  | 0.9300   |

|                  |            |
|------------------|------------|
| C(20)-H(20)      | 0.9300     |
| C(22)-C(23)      | 1.421(5)   |
| C(22)-H(22A)     | 0.9700     |
| C(22)-H(22B)     | 0.9700     |
| C(23)-H(23A)     | 0.9600     |
| C(23)-H(23B)     | 0.9600     |
| C(23)-H(23C)     | 0.9600     |
| C(25)-C(26)      | 1.500(4)   |
| C(25)-H(25A)     | 0.9700     |
| C(25)-H(25B)     | 0.9700     |
| C(26)-H(26A)     | 0.9600     |
| C(26)-H(26B)     | 0.9600     |
| C(26)-H(26C)     | 0.9600     |
|                  |            |
| C(21)-O(2)-C(22) | 116.7(3)   |
| C(24)-O(5)-C(25) | 115.61(16) |
| C(8)-N(1)-C(1)   | 108.39(17) |
| C(8)-N(1)-C(9)   | 125.9(2)   |
| C(1)-N(1)-C(9)   | 125.6(2)   |
| C(14)-N(2)-C(15) | 111.15(15) |
| C(14)-N(2)-H(2A) | 124.4      |
| C(15)-N(2)-H(2A) | 124.4      |
| N(1)-C(1)-C(2)   | 129.6(2)   |
| N(1)-C(1)-C(6)   | 107.75(17) |
| C(2)-C(1)-C(6)   | 122.7(2)   |
| C(3)-C(2)-C(1)   | 117.0(2)   |
| C(3)-C(2)-H(2)   | 121.5      |
| C(1)-C(2)-H(2)   | 121.5      |
| C(2)-C(3)-C(4)   | 121.8(2)   |
| C(2)-C(3)-H(3)   | 119.1      |
| C(4)-C(3)-H(3)   | 119.1      |
| C(3)-C(4)-C(5)   | 121.4(2)   |
| C(3)-C(4)-H(4)   | 119.3      |
| C(5)-C(4)-H(4)   | 119.3      |
| C(4)-C(5)-C(6)   | 118.8(2)   |
| C(4)-C(5)-H(5)   | 120.6      |
| C(6)-C(5)-H(5)   | 120.6      |
| C(5)-C(6)-C(1)   | 118.39(19) |
| C(5)-C(6)-C(7)   | 134.41(19) |
| C(1)-C(6)-C(7)   | 107.18(17) |
| C(8)-C(7)-C(6)   | 105.94(17) |
| C(8)-C(7)-C(10)  | 127.45(19) |
| C(6)-C(7)-C(10)  | 126.57(18) |
| N(1)-C(8)-C(7)   | 110.72(19) |
| N(1)-C(8)-H(8)   | 124.6      |
| C(7)-C(8)-H(8)   | 124.6      |
| N(1)-C(9)-H(9A)  | 109.5      |
| N(1)-C(9)-H(9B)  | 109.5      |
| H(9A)-C(9)-H(9B) | 109.5      |
| N(1)-C(9)-H(9C)  | 109.5      |
| H(9A)-C(9)-H(9C) | 109.5      |
| H(9B)-C(9)-H(9C) | 109.5      |
| C(7)-C(10)-C(11) | 112.70(17) |

|                     |            |
|---------------------|------------|
| C(7)-C(10)-H(10A)   | 109.1      |
| C(11)-C(10)-H(10A)  | 109.1      |
| C(7)-C(10)-H(10B)   | 109.1      |
| C(11)-C(10)-H(10B)  | 109.1      |
| H(10A)-C(10)-H(10B) | 107.8      |
| C(21)-C(11)-C(12)   | 113.40(15) |
| C(21)-C(11)-C(10)   | 109.25(16) |
| C(12)-C(11)-C(10)   | 110.54(15) |
| C(21)-C(11)-H(11)   | 107.8      |
| C(12)-C(11)-H(11)   | 107.8      |
| C(10)-C(11)-H(11)   | 107.8      |
| C(13)-C(12)-C(24)   | 121.70(16) |
| C(13)-C(12)-C(11)   | 121.21(17) |
| C(24)-C(12)-C(11)   | 116.98(15) |
| C(12)-C(13)-C(16)   | 131.77(16) |
| C(12)-C(13)-C(14)   | 122.83(17) |
| C(16)-C(13)-C(14)   | 105.26(15) |
| O(1)-C(14)-N(2)     | 125.78(17) |
| O(1)-C(14)-C(13)    | 127.40(17) |
| N(2)-C(14)-C(13)    | 106.81(16) |
| C(20)-C(15)-C(16)   | 122.73(18) |
| C(20)-C(15)-N(2)    | 127.35(18) |
| C(16)-C(15)-N(2)    | 109.92(15) |
| C(17)-C(16)-C(15)   | 118.16(16) |
| C(17)-C(16)-C(13)   | 135.04(17) |
| C(15)-C(16)-C(13)   | 106.79(15) |
| C(18)-C(17)-C(16)   | 119.85(18) |
| C(18)-C(17)-H(17)   | 120.1      |
| C(16)-C(17)-H(17)   | 120.1      |
| C(19)-C(18)-C(17)   | 120.37(19) |
| C(19)-C(18)-H(18)   | 119.8      |
| C(17)-C(18)-H(18)   | 119.8      |
| C(18)-C(19)-C(20)   | 121.50(19) |
| C(18)-C(19)-H(19)   | 119.2      |
| C(20)-C(19)-H(19)   | 119.2      |
| C(15)-C(20)-C(19)   | 117.39(19) |
| C(15)-C(20)-H(20)   | 121.3      |
| C(19)-C(20)-H(20)   | 121.3      |
| O(3)-C(21)-O(2)     | 124.6(2)   |
| O(3)-C(21)-C(11)    | 125.1(2)   |
| O(2)-C(21)-C(11)    | 110.29(18) |
| C(23)-C(22)-O(2)    | 111.8(3)   |
| C(23)-C(22)-H(22A)  | 109.3      |
| O(2)-C(22)-H(22A)   | 109.3      |
| C(23)-C(22)-H(22B)  | 109.3      |
| O(2)-C(22)-H(22B)   | 109.3      |
| H(22A)-C(22)-H(22B) | 107.9      |
| C(22)-C(23)-H(23A)  | 109.5      |
| C(22)-C(23)-H(23B)  | 109.5      |
| H(23A)-C(23)-H(23B) | 109.5      |
| C(22)-C(23)-H(23C)  | 109.5      |
| H(23A)-C(23)-H(23C) | 109.5      |
| H(23B)-C(23)-H(23C) | 109.5      |

|                     |            |
|---------------------|------------|
| O(4)-C(24)-O(5)     | 125.52(18) |
| O(4)-C(24)-C(12)    | 122.49(17) |
| O(5)-C(24)-C(12)    | 111.84(16) |
| O(5)-C(25)-C(26)    | 112.3(2)   |
| O(5)-C(25)-H(25A)   | 109.1      |
| C(26)-C(25)-H(25A)  | 109.1      |
| O(5)-C(25)-H(25B)   | 109.1      |
| C(26)-C(25)-H(25B)  | 109.1      |
| H(25A)-C(25)-H(25B) | 107.9      |
| C(25)-C(26)-H(26A)  | 109.5      |
| C(25)-C(26)-H(26B)  | 109.5      |
| H(26A)-C(26)-H(26B) | 109.5      |
| C(25)-C(26)-H(26C)  | 109.5      |
| H(26A)-C(26)-H(26C) | 109.5      |
| H(26B)-C(26)-H(26C) | 109.5      |

---

Symmetry transformations used to generate equivalent atoms:

Table 4. Anisotropic displacement parameters ( $\text{\AA}^2 \times 10^3$ ) for mo\_20140522A\_0m. The anisotropic displacement factor exponent takes the form:  $-2 \pi^2 [ h^2 a^{*2} U_{11} + \dots + 2 h k a^* b^* U_{12} ]$

|       | U11    | U22    | U33    | U23    | U13    | U12    |
|-------|--------|--------|--------|--------|--------|--------|
| O(1)  | 43(1)  | 35(1)  | 66(1)  | -3(1)  | -12(1) | -5(1)  |
| O(2)  | 113(2) | 61(1)  | 47(1)  | 3(1)   | -28(1) | 2(1)   |
| O(3)  | 58(1)  | 49(1)  | 89(1)  | 19(1)  | -5(1)  | 8(1)   |
| O(4)  | 55(1)  | 41(1)  | 56(1)  | 6(1)   | 5(1)   | -5(1)  |
| O(5)  | 51(1)  | 39(1)  | 53(1)  | 0(1)   | 2(1)   | 5(1)   |
| N(1)  | 44(1)  | 39(1)  | 78(1)  | -8(1)  | 8(1)   | -7(1)  |
| N(2)  | 38(1)  | 40(1)  | 51(1)  | 1(1)   | -12(1) | -2(1)  |
| C(1)  | 36(1)  | 50(1)  | 48(1)  | -6(1)  | 7(1)   | -6(1)  |
| C(2)  | 44(1)  | 80(2)  | 59(1)  | -16(1) | 4(1)   | -15(1) |
| C(3)  | 38(1)  | 102(2) | 62(2)  | 4(1)   | -2(1)  | 5(1)   |
| C(4)  | 53(1)  | 74(2)  | 74(2)  | 18(1)  | 14(1)  | 18(1)  |
| C(5)  | 51(1)  | 48(1)  | 63(1)  | 5(1)   | 13(1)  | 3(1)   |
| C(6)  | 40(1)  | 43(1)  | 45(1)  | -1(1)  | 6(1)   | -4(1)  |
| C(7)  | 42(1)  | 41(1)  | 50(1)  | 2(1)   | 3(1)   | -6(1)  |
| C(8)  | 39(1)  | 41(1)  | 70(1)  | 4(1)   | 2(1)   | -3(1)  |
| C(9)  | 66(2)  | 41(1)  | 111(2) | -16(1) | 22(2)  | -14(1) |
| C(10) | 44(1)  | 46(1)  | 50(1)  | 1(1)   | -2(1)  | -9(1)  |
| C(11) | 36(1)  | 32(1)  | 45(1)  | 1(1)   | -7(1)  | -4(1)  |
| C(12) | 35(1)  | 33(1)  | 41(1)  | -1(1)  | -1(1)  | -4(1)  |
| C(13) | 37(1)  | 33(1)  | 39(1)  | -1(1)  | -3(1)  | -5(1)  |
| C(14) | 35(1)  | 38(1)  | 43(1)  | -2(1)  | -5(1)  | -3(1)  |
| C(15) | 41(1)  | 38(1)  | 40(1)  | 2(1)   | -2(1)  | -1(1)  |
| C(16) | 38(1)  | 35(1)  | 37(1)  | 1(1)   | 0(1)   | 0(1)   |
| C(17) | 48(1)  | 37(1)  | 47(1)  | -2(1)  | -5(1)  | -4(1)  |
| C(18) | 65(1)  | 34(1)  | 57(1)  | -1(1)  | -1(1)  | -3(1)  |
| C(19) | 64(1)  | 37(1)  | 63(1)  | 5(1)   | 0(1)   | 10(1)  |
| C(20) | 48(1)  | 46(1)  | 56(1)  | 7(1)   | -4(1)  | 7(1)   |
| C(21) | 39(1)  | 39(1)  | 59(1)  | 9(1)   | -10(1) | -10(1) |
| C(22) | 199(4) | 86(2)  | 71(2)  | 23(2)  | -75(2) | -17(3) |
| C(23) | 147(4) | 133(3) | 110(3) | 41(3)  | -70(3) | -33(3) |
| C(24) | 32(1)  | 35(1)  | 50(1)  | 1(1)   | -6(1)  | -2(1)  |
| C(25) | 77(2)  | 43(1)  | 61(1)  | 2(1)   | 4(1)   | 21(1)  |
| C(26) | 116(2) | 41(1)  | 81(2)  | -4(1)  | -1(2)  | -12(1) |



Table 5. Hydrogen coordinates ( $\times 10^4$ ) and isotropic displacement parameters ( $\text{\AA}^2 \times 10^3$ ) for mo\_20140522A\_0m.

|        | x     | y     | z    | U(eq) |
|--------|-------|-------|------|-------|
| H(2A)  | 9745  | 9271  | 4996 | 53    |
| H(2)   | -1997 | 7583  | 1597 | 73    |
| H(3)   | -3179 | 8754  | 1286 | 82    |
| H(4)   | -2141 | 9894  | 1814 | 80    |
| H(5)   | 181   | 9923  | 2620 | 64    |
| H(8)   | 2761  | 7467  | 3350 | 60    |
| H(9A)  | 1231  | 6339  | 2732 | 108   |
| H(9B)  | 329   | 6534  | 1805 | 108   |
| H(9C)  | -467  | 6509  | 2702 | 108   |
| H(10A) | 3568  | 8872  | 4063 | 57    |
| H(10B) | 2591  | 9571  | 3705 | 57    |
| H(11)  | 4624  | 8840  | 2618 | 46    |
| H(17)  | 5273  | 7874  | 3350 | 53    |
| H(18)  | 6337  | 6682  | 3704 | 63    |
| H(19)  | 8637  | 6603  | 4501 | 66    |
| H(20)  | 9928  | 7710  | 4988 | 61    |
| H(22A) | 2373  | 10207 | 602  | 148   |
| H(22B) | 3484  | 9810  | -3   | 148   |
| H(23A) | 2107  | 8748  | -113 | 202   |
| H(23B) | 1089  | 9455  | -390 | 202   |
| H(23C) | 1052  | 9080  | 573  | 202   |
| H(25A) | 4099  | 11988 | 4248 | 72    |
| H(25B) | 4540  | 11944 | 3247 | 72    |
| H(26A) | 6618  | 12078 | 4768 | 120   |
| H(26B) | 6114  | 12770 | 4131 | 120   |
| H(26C) | 7006  | 12086 | 3756 | 120   |

Table 6. Torsion angles [deg] for mo\_20140522A\_0m.

---

|                         |             |
|-------------------------|-------------|
| C(8)-N(1)-C(1)-C(2)     | -179.2(2)   |
| C(9)-N(1)-C(1)-C(2)     | -1.8(4)     |
| C(8)-N(1)-C(1)-C(6)     | 0.4(2)      |
| C(9)-N(1)-C(1)-C(6)     | 177.7(2)    |
| N(1)-C(1)-C(2)-C(3)     | 178.8(2)    |
| C(6)-C(1)-C(2)-C(3)     | -0.7(3)     |
| C(1)-C(2)-C(3)-C(4)     | -0.7(4)     |
| C(2)-C(3)-C(4)-C(5)     | 1.6(4)      |
| C(3)-C(4)-C(5)-C(6)     | -1.1(3)     |
| C(4)-C(5)-C(6)-C(1)     | -0.2(3)     |
| C(4)-C(5)-C(6)-C(7)     | -178.6(2)   |
| N(1)-C(1)-C(6)-C(5)     | -178.42(17) |
| C(2)-C(1)-C(6)-C(5)     | 1.2(3)      |
| N(1)-C(1)-C(6)-C(7)     | 0.3(2)      |
| C(2)-C(1)-C(6)-C(7)     | 179.94(19)  |
| C(5)-C(6)-C(7)-C(8)     | 177.5(2)    |
| C(1)-C(6)-C(7)-C(8)     | -0.9(2)     |
| C(5)-C(6)-C(7)-C(10)    | -4.7(4)     |
| C(1)-C(6)-C(7)-C(10)    | 176.88(19)  |
| C(1)-N(1)-C(8)-C(7)     | -1.0(2)     |
| C(9)-N(1)-C(8)-C(7)     | -178.4(2)   |
| C(6)-C(7)-C(8)-N(1)     | 1.2(2)      |
| C(10)-C(7)-C(8)-N(1)    | -176.57(19) |
| C(8)-C(7)-C(10)-C(11)   | 86.0(3)     |
| C(6)-C(7)-C(10)-C(11)   | -91.3(2)    |
| C(7)-C(10)-C(11)-C(21)  | 65.6(2)     |
| C(7)-C(10)-C(11)-C(12)  | -168.95(16) |
| C(21)-C(11)-C(12)-C(13) | -154.18(19) |
| C(10)-C(11)-C(12)-C(13) | 82.7(2)     |
| C(21)-C(11)-C(12)-C(24) | 22.1(2)     |
| C(10)-C(11)-C(12)-C(24) | -101.01(19) |
| C(24)-C(12)-C(13)-C(16) | -173.50(18) |
| C(11)-C(12)-C(13)-C(16) | 2.6(3)      |
| C(24)-C(12)-C(13)-C(14) | 1.5(3)      |
| C(11)-C(12)-C(13)-C(14) | 177.52(16)  |
| C(15)-N(2)-C(14)-O(1)   | -177.16(19) |
| C(15)-N(2)-C(14)-C(13)  | 2.3(2)      |
| C(12)-C(13)-C(14)-O(1)  | 2.3(3)      |
| C(16)-C(13)-C(14)-O(1)  | 178.39(19)  |
| C(12)-C(13)-C(14)-N(2)  | -177.17(18) |
| C(16)-C(13)-C(14)-N(2)  | -1.06(19)   |
| C(14)-N(2)-C(15)-C(20)  | 176.98(19)  |
| C(14)-N(2)-C(15)-C(16)  | -2.8(2)     |
| C(20)-C(15)-C(16)-C(17) | 0.9(3)      |
| N(2)-C(15)-C(16)-C(17)  | -179.39(16) |
| C(20)-C(15)-C(16)-C(13) | -177.82(18) |
| N(2)-C(15)-C(16)-C(13)  | 1.9(2)      |
| C(12)-C(13)-C(16)-C(17) | -3.3(4)     |
| C(14)-C(13)-C(16)-C(17) | -178.9(2)   |

|                         |             |
|-------------------------|-------------|
| C(12)-C(13)-C(16)-C(15) | 175.1(2)    |
| C(14)-C(13)-C(16)-C(15) | -0.53(19)   |
| C(15)-C(16)-C(17)-C(18) | -0.6(3)     |
| C(13)-C(16)-C(17)-C(18) | 177.7(2)    |
| C(16)-C(17)-C(18)-C(19) | -0.1(3)     |
| C(17)-C(18)-C(19)-C(20) | 0.5(4)      |
| C(16)-C(15)-C(20)-C(19) | -0.5(3)     |
| N(2)-C(15)-C(20)-C(19)  | 179.8(2)    |
| C(18)-C(19)-C(20)-C(15) | -0.2(3)     |
| C(22)-O(2)-C(21)-O(3)   | -5.5(4)     |
| C(22)-O(2)-C(21)-C(11)  | 172.3(3)    |
| C(12)-C(11)-C(21)-O(3)  | -65.4(3)    |
| C(10)-C(11)-C(21)-O(3)  | 58.4(2)     |
| C(12)-C(11)-C(21)-O(2)  | 116.74(19)  |
| C(10)-C(11)-C(21)-O(2)  | -119.48(19) |
| C(21)-O(2)-C(22)-C(23)  | -113.3(4)   |
| C(25)-O(5)-C(24)-O(4)   | 1.3(3)      |
| C(25)-O(5)-C(24)-C(12)  | -174.35(16) |
| C(13)-C(12)-C(24)-O(4)  | 96.4(2)     |
| C(11)-C(12)-C(24)-O(4)  | -79.8(2)    |
| C(13)-C(12)-C(24)-O(5)  | -87.8(2)    |
| C(11)-C(12)-C(24)-O(5)  | 95.98(19)   |
| C(24)-O(5)-C(25)-C(26)  | -81.8(2)    |

---

Symmetry transformations used to generate equivalent atoms:

Table 7. Hydrogen bonds for mo\_20140522A\_0m [A and deg.].

---

| D-H...A             | d(D-H) | d(H...A) | d(D...A) | <(DHA) |
|---------------------|--------|----------|----------|--------|
| N(2)-H(2A)...O(1)#1 | 0.86   | 2.03     | 2.889(2) | 173.2  |

---

Symmetry transformations used to generate equivalent atoms:

#1 -x+2,-y+2,-z+1

## 9. X-ray Crystallographic Data for Product 6

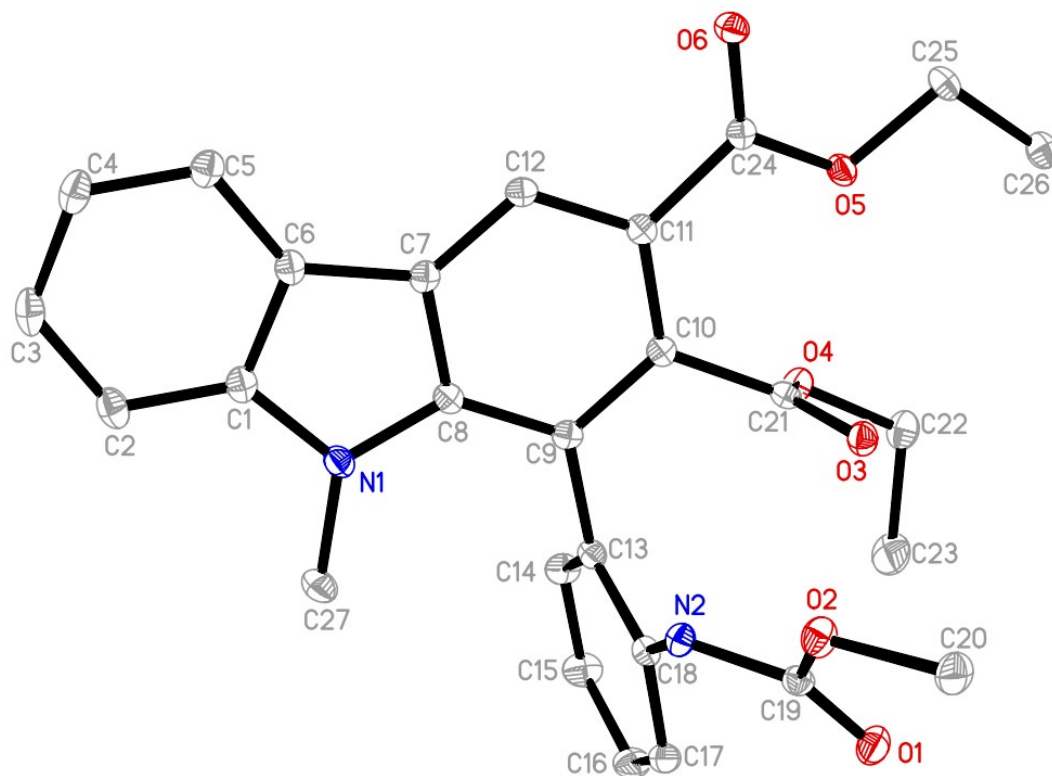

Figure 2. X-ray crystal structure of 6

Table 2. Crystal data and structure refinement for mo\_20170104a\_0m.

|                             |                                                                                                                   |
|-----------------------------|-------------------------------------------------------------------------------------------------------------------|
| Identification code         | mo_20170104a_0m                                                                                                   |
| Empirical formula           | C <sub>27</sub> H <sub>26</sub> N <sub>2</sub> O <sub>6</sub>                                                     |
| Formula weight              | 474.50                                                                                                            |
| Temperature                 | 100(2) K                                                                                                          |
| Wavelength                  | 0.71073 Å                                                                                                         |
| Crystal system, space group | Monoclinic, P 2 <sub>1</sub> /c                                                                                   |
| Unit cell dimensions        | a = 9.3272(8) Å alpha = 90 deg.<br>b = 13.2464(12) Å beta = 95.3720(10) deg.<br>c = 18.7695(16) Å gamma = 90 deg. |
| Volume                      | 2308.8(3) Å <sup>3</sup>                                                                                          |

Z, Calculated density      4, 1.365 Mg/m<sup>3</sup>  
Absorption coefficient      0.097 mm<sup>-1</sup>  
F(000)                      1000  
Crystal size                0.34 x 0.25 x 0.21 mm  
Theta range for data collection 1.88 to 26.00 deg.  
Limiting indices            -11<=h<=11, -14<=k<=16, -23<=l<=21  
Reflections collected / unique 16032 / 4528 [R(int) = 0.0223]  
Completeness to theta = 26.00 99.7 %  
Absorption correction      Semi-empirical from equivalents  
Max. and min. transmission 0.9799 and 0.9677  
Refinement method        Full-matrix least-squares on F<sup>2</sup>  
Data / restraints / parameters 4528 / 0 / 320  
Goodness-of-fit on F<sup>2</sup>      1.073  
Final R indices [I>2sigma(I)] R1 = 0.0353, wR2 = 0.1019  
R indices (all data)        R1 = 0.0423, wR2 = 0.1066  
Largest diff. peak and hole 0.337 and -0.366 e.A<sup>-3</sup>

Table 2. Atomic coordinates ( $\times 10^4$ ) and equivalent isotropic displacement parameters ( $\text{\AA}^2 \times 10^3$ ) for mo\_20170104A\_0m. U(eq) is defined as one third of the trace of the orthogonalized  $U_{ij}$  tensor.

|       | x       | y        | z        | U(eq) |
|-------|---------|----------|----------|-------|
| O(1)  | 1834(1) | 5787(1)  | 10478(1) | 27(1) |
| O(2)  | -234(1) | 6652(1)  | 10197(1) | 23(1) |
| O(3)  | 2265(1) | 8156(1)  | 11048(1) | 21(1) |
| O(4)  | 4396(1) | 8955(1)  | 11023(1) | 22(1) |
| O(5)  | 2165(1) | 10316(1) | 11449(1) | 21(1) |
| O(6)  | 604(1)  | 11450(1) | 10941(1) | 21(1) |
| N(1)  | 2531(1) | 9372(1)  | 8153(1)  | 21(1) |
| N(2)  | 1670(1) | 7051(1)  | 9638(1)  | 18(1) |
| C(1)  | 1858(1) | 10148(1) | 7745(1)  | 21(1) |
| C(2)  | 1741(2) | 10281(1) | 7006(1)  | 26(1) |
| C(3)  | 990(2)  | 11117(1) | 6734(1)  | 28(1) |
| C(4)  | 361(2)  | 11802(1) | 7180(1)  | 27(1) |
| C(5)  | 482(1)  | 11673(1) | 7913(1)  | 23(1) |
| C(6)  | 1254(1) | 10841(1) | 8201(1)  | 19(1) |
| C(7)  | 1611(1) | 10479(1) | 8921(1)  | 18(1) |
| C(8)  | 2400(1) | 9570(1)  | 8869(1)  | 18(1) |
| C(9)  | 2893(1) | 9020(1)  | 9485(1)  | 18(1) |
| C(10) | 2554(1) | 9400(1)  | 10143(1) | 17(1) |
| C(11) | 1772(1) | 10309(1) | 10197(1) | 17(1) |
| C(12) | 1306(1) | 10842(1) | 9581(1)  | 17(1) |
| C(13) | 3761(1) | 8074(1)  | 9450(1)  | 19(1) |
| C(14) | 5212(2) | 8140(1)  | 9334(1)  | 25(1) |
| C(15) | 6053(2) | 7281(1)  | 9296(1)  | 29(1) |
| C(16) | 5433(2) | 6336(1)  | 9370(1)  | 27(1) |
| C(17) | 3992(1) | 6256(1)  | 9485(1)  | 22(1) |
| C(18) | 3149(1) | 7121(1)  | 9532(1)  | 18(1) |
| C(19) | 1169(1) | 6438(1)  | 10142(1) | 19(1) |
| C(20) | -900(2) | 6074(1)  | 10723(1) | 27(1) |
| C(21) | 3021(1) | 8769(1)  | 10792(1) | 18(1) |
| C(22) | 4997(2) | 8335(1)  | 11616(1) | 28(1) |
| C(23) | 5550(2) | 7359(1)  | 11348(1) | 42(1) |
| C(24) | 1427(1) | 10752(1) | 10886(1) | 17(1) |
| C(25) | 1920(2) | 10696(1) | 12154(1) | 23(1) |
| C(26) | 2753(2) | 10024(1) | 12688(1) | 28(1) |
| C(27) | 3187(2) | 8507(1)  | 7832(1)  | 29(1) |

Table 3. Bond lengths [Å] and angles [deg] for mo\_20170104A\_0m.

---

|              |            |
|--------------|------------|
| O(1)-C(19)   | 1.2055(16) |
| O(2)-C(19)   | 1.3516(16) |
| O(2)-C(20)   | 1.4366(17) |
| O(3)-C(21)   | 1.2050(16) |
| O(4)-C(21)   | 1.3374(15) |
| O(4)-C(22)   | 1.4529(16) |
| O(5)-C(24)   | 1.3371(15) |
| O(5)-C(25)   | 1.4538(16) |
| O(6)-C(24)   | 1.2121(16) |
| N(1)-C(8)    | 1.3840(17) |
| N(1)-C(1)    | 1.3953(17) |
| N(1)-C(27)   | 1.4566(18) |
| N(2)-C(19)   | 1.3629(17) |
| N(2)-C(18)   | 1.4149(16) |
| N(2)-H(2A)   | 0.8600     |
| C(1)-C(2)    | 1.3925(19) |
| C(1)-C(6)    | 1.4088(19) |
| C(2)-C(3)    | 1.382(2)   |
| C(2)-H(2)    | 0.9300     |
| C(3)-C(4)    | 1.400(2)   |
| C(3)-H(3)    | 0.9300     |
| C(4)-C(5)    | 1.381(2)   |
| C(4)-H(4)    | 0.9300     |
| C(5)-C(6)    | 1.3970(19) |
| C(5)-H(5)    | 0.9300     |
| C(6)-C(7)    | 1.4437(18) |
| C(7)-C(12)   | 1.3828(18) |
| C(7)-C(8)    | 1.4194(18) |
| C(8)-C(9)    | 1.4075(18) |
| C(9)-C(10)   | 1.3977(18) |
| C(9)-C(13)   | 1.4967(17) |
| C(10)-C(11)  | 1.4169(18) |
| C(10)-C(21)  | 1.5068(18) |
| C(11)-C(12)  | 1.3883(18) |
| C(11)-C(24)  | 1.4832(18) |
| C(12)-H(12)  | 0.9300     |
| C(13)-C(14)  | 1.3936(19) |
| C(13)-C(18)  | 1.4001(18) |
| C(14)-C(15)  | 1.388(2)   |
| C(14)-H(14)  | 0.9300     |
| C(15)-C(16)  | 1.391(2)   |
| C(15)-H(15)  | 0.9300     |
| C(16)-C(17)  | 1.385(2)   |
| C(16)-H(16)  | 0.9300     |
| C(17)-C(18)  | 1.3968(18) |
| C(17)-H(17)  | 0.9300     |
| C(20)-H(20A) | 0.9600     |
| C(20)-H(20B) | 0.9600     |
| C(20)-H(20C) | 0.9600     |

|                  |            |
|------------------|------------|
| C(22)-C(23)      | 1.496(2)   |
| C(22)-H(22A)     | 0.9700     |
| C(22)-H(22B)     | 0.9700     |
| C(23)-H(23A)     | 0.9600     |
| C(23)-H(23B)     | 0.9600     |
| C(23)-H(23C)     | 0.9600     |
| C(25)-C(26)      | 1.5012(19) |
| C(25)-H(25A)     | 0.9700     |
| C(25)-H(25B)     | 0.9700     |
| C(26)-H(26A)     | 0.9600     |
| C(26)-H(26B)     | 0.9600     |
| C(26)-H(26C)     | 0.9600     |
| C(27)-H(27A)     | 0.9600     |
| C(27)-H(27B)     | 0.9600     |
| C(27)-H(27C)     | 0.9600     |
|                  |            |
| C(19)-O(2)-C(20) | 115.12(10) |
| C(21)-O(4)-C(22) | 115.71(10) |
| C(24)-O(5)-C(25) | 117.16(10) |
| C(8)-N(1)-C(1)   | 108.51(11) |
| C(8)-N(1)-C(27)  | 128.97(11) |
| C(1)-N(1)-C(27)  | 122.47(11) |
| C(19)-N(2)-C(18) | 122.58(11) |
| C(19)-N(2)-H(2A) | 118.7      |
| C(18)-N(2)-H(2A) | 118.7      |
| C(2)-C(1)-N(1)   | 129.04(13) |
| C(2)-C(1)-C(6)   | 121.63(13) |
| N(1)-C(1)-C(6)   | 109.33(11) |
| C(3)-C(2)-C(1)   | 117.29(14) |
| C(3)-C(2)-H(2)   | 121.4      |
| C(1)-C(2)-H(2)   | 121.4      |
| C(2)-C(3)-C(4)   | 121.69(13) |
| C(2)-C(3)-H(3)   | 119.2      |
| C(4)-C(3)-H(3)   | 119.2      |
| C(5)-C(4)-C(3)   | 121.04(13) |
| C(5)-C(4)-H(4)   | 119.5      |
| C(3)-C(4)-H(4)   | 119.5      |
| C(4)-C(5)-C(6)   | 118.30(13) |
| C(4)-C(5)-H(5)   | 120.8      |
| C(6)-C(5)-H(5)   | 120.8      |
| C(5)-C(6)-C(1)   | 120.02(12) |
| C(5)-C(6)-C(7)   | 133.60(13) |
| C(1)-C(6)-C(7)   | 106.38(12) |
| C(12)-C(7)-C(8)  | 120.58(12) |
| C(12)-C(7)-C(6)  | 132.42(12) |
| C(8)-C(7)-C(6)   | 106.99(11) |
| N(1)-C(8)-C(9)   | 130.33(12) |
| N(1)-C(8)-C(7)   | 108.76(11) |
| C(9)-C(8)-C(7)   | 120.90(12) |
| C(10)-C(9)-C(8)  | 117.18(11) |
| C(10)-C(9)-C(13) | 120.55(11) |
| C(8)-C(9)-C(13)  | 122.27(11) |
| C(9)-C(10)-C(11) | 121.96(12) |



|                     |            |
|---------------------|------------|
| C(9)-C(10)-C(21)    | 116.27(11) |
| C(11)-C(10)-C(21)   | 121.74(11) |
| C(12)-C(11)-C(10)   | 119.74(12) |
| C(12)-C(11)-C(24)   | 116.64(11) |
| C(10)-C(11)-C(24)   | 123.60(11) |
| C(7)-C(12)-C(11)    | 119.62(12) |
| C(7)-C(12)-H(12)    | 120.2      |
| C(11)-C(12)-H(12)   | 120.2      |
| C(14)-C(13)-C(18)   | 119.06(12) |
| C(14)-C(13)-C(9)    | 119.43(11) |
| C(18)-C(13)-C(9)    | 121.51(11) |
| C(15)-C(14)-C(13)   | 121.24(13) |
| C(15)-C(14)-H(14)   | 119.4      |
| C(13)-C(14)-H(14)   | 119.4      |
| C(14)-C(15)-C(16)   | 119.36(13) |
| C(14)-C(15)-H(15)   | 120.3      |
| C(16)-C(15)-H(15)   | 120.3      |
| C(17)-C(16)-C(15)   | 120.19(13) |
| C(17)-C(16)-H(16)   | 119.9      |
| C(15)-C(16)-H(16)   | 119.9      |
| C(16)-C(17)-C(18)   | 120.49(12) |
| C(16)-C(17)-H(17)   | 119.8      |
| C(18)-C(17)-H(17)   | 119.8      |
| C(17)-C(18)-C(13)   | 119.66(12) |
| C(17)-C(18)-N(2)    | 121.20(12) |
| C(13)-C(18)-N(2)    | 119.11(11) |
| O(1)-C(19)-O(2)     | 124.39(12) |
| O(1)-C(19)-N(2)     | 126.61(12) |
| O(2)-C(19)-N(2)     | 108.97(11) |
| O(2)-C(20)-H(20A)   | 109.5      |
| O(2)-C(20)-H(20B)   | 109.5      |
| H(20A)-C(20)-H(20B) | 109.5      |
| O(2)-C(20)-H(20C)   | 109.5      |
| H(20A)-C(20)-H(20C) | 109.5      |
| H(20B)-C(20)-H(20C) | 109.5      |
| O(3)-C(21)-O(4)     | 125.01(12) |
| O(3)-C(21)-C(10)    | 124.05(11) |
| O(4)-C(21)-C(10)    | 110.89(10) |
| O(4)-C(22)-C(23)    | 110.55(12) |
| O(4)-C(22)-H(22A)   | 109.5      |
| C(23)-C(22)-H(22A)  | 109.5      |
| O(4)-C(22)-H(22B)   | 109.5      |
| C(23)-C(22)-H(22B)  | 109.5      |
| H(22A)-C(22)-H(22B) | 108.1      |
| C(22)-C(23)-H(23A)  | 109.5      |
| C(22)-C(23)-H(23B)  | 109.5      |
| H(23A)-C(23)-H(23B) | 109.5      |
| C(22)-C(23)-H(23C)  | 109.5      |
| H(23A)-C(23)-H(23C) | 109.5      |
| H(23B)-C(23)-H(23C) | 109.5      |
| O(6)-C(24)-O(5)     | 123.09(12) |
| O(6)-C(24)-C(11)    | 124.48(12) |
| O(5)-C(24)-C(11)    | 112.40(11) |

|                     |            |
|---------------------|------------|
| O(5)-C(25)-C(26)    | 106.61(11) |
| O(5)-C(25)-H(25A)   | 110.4      |
| C(26)-C(25)-H(25A)  | 110.4      |
| O(5)-C(25)-H(25B)   | 110.4      |
| C(26)-C(25)-H(25B)  | 110.4      |
| H(25A)-C(25)-H(25B) | 108.6      |
| C(25)-C(26)-H(26A)  | 109.5      |
| C(25)-C(26)-H(26B)  | 109.5      |
| H(26A)-C(26)-H(26B) | 109.5      |
| C(25)-C(26)-H(26C)  | 109.5      |
| H(26A)-C(26)-H(26C) | 109.5      |
| H(26B)-C(26)-H(26C) | 109.5      |
| N(1)-C(27)-H(27A)   | 109.5      |
| N(1)-C(27)-H(27B)   | 109.5      |
| H(27A)-C(27)-H(27B) | 109.5      |
| N(1)-C(27)-H(27C)   | 109.5      |
| H(27A)-C(27)-H(27C) | 109.5      |
| H(27B)-C(27)-H(27C) | 109.5      |

---

Symmetry transformations used to generate equivalent atoms:

Table 4. Anisotropic displacement parameters ( $\text{\AA}^2 \times 10^3$ ) for mo\_20170104A\_0m. The anisotropic displacement factor exponent takes the form:  $-2 \pi^2 [ h^2 a^{*2} U_{11} + \dots + 2 h k a^* b^* U_{12} ]$

|       | U11   | U22   | U33   | U23   | U13   | U12   |
|-------|-------|-------|-------|-------|-------|-------|
| O(1)  | 29(1) | 25(1) | 27(1) | 7(1)  | 7(1)  | 5(1)  |
| O(2)  | 18(1) | 26(1) | 26(1) | 4(1)  | 6(1)  | -2(1) |
| O(3)  | 23(1) | 22(1) | 19(1) | 1(1)  | 2(1)  | -4(1) |
| O(4)  | 17(1) | 25(1) | 24(1) | 4(1)  | -1(1) | 0(1)  |
| O(5)  | 23(1) | 24(1) | 15(1) | -2(1) | 0(1)  | 4(1)  |
| O(6)  | 21(1) | 22(1) | 21(1) | -3(1) | 2(1)  | 3(1)  |
| N(1)  | 23(1) | 22(1) | 18(1) | -2(1) | 5(1)  | -1(1) |
| N(2)  | 16(1) | 19(1) | 18(1) | 2(1)  | 0(1)  | -1(1) |
| C(1)  | 20(1) | 24(1) | 20(1) | 1(1)  | 2(1)  | -6(1) |
| C(2)  | 26(1) | 33(1) | 19(1) | -1(1) | 4(1)  | -8(1) |
| C(3)  | 27(1) | 39(1) | 18(1) | 6(1)  | 0(1)  | -9(1) |
| C(4)  | 26(1) | 28(1) | 25(1) | 9(1)  | -2(1) | -5(1) |
| C(5)  | 22(1) | 22(1) | 23(1) | 2(1)  | 0(1)  | -4(1) |
| C(6)  | 18(1) | 21(1) | 19(1) | 1(1)  | 1(1)  | -6(1) |
| C(7)  | 16(1) | 19(1) | 19(1) | 1(1)  | 1(1)  | -4(1) |
| C(8)  | 16(1) | 19(1) | 19(1) | -2(1) | 4(1)  | -5(1) |
| C(9)  | 15(1) | 18(1) | 21(1) | -1(1) | 3(1)  | -3(1) |
| C(10) | 13(1) | 18(1) | 19(1) | -1(1) | 2(1)  | -4(1) |
| C(11) | 14(1) | 19(1) | 18(1) | -1(1) | 2(1)  | -3(1) |
| C(12) | 15(1) | 16(1) | 21(1) | -1(1) | 2(1)  | -2(1) |
| C(13) | 19(1) | 20(1) | 17(1) | -1(1) | 2(1)  | 1(1)  |
| C(14) | 21(1) | 23(1) | 30(1) | -2(1) | 7(1)  | -3(1) |
| C(15) | 19(1) | 30(1) | 40(1) | -3(1) | 10(1) | 1(1)  |
| C(16) | 26(1) | 24(1) | 33(1) | -3(1) | 6(1)  | 7(1)  |
| C(17) | 25(1) | 19(1) | 23(1) | -1(1) | 4(1)  | 0(1)  |
| C(18) | 18(1) | 21(1) | 16(1) | -1(1) | 2(1)  | 0(1)  |
| C(19) | 20(1) | 18(1) | 19(1) | -3(1) | 2(1)  | -2(1) |
| C(20) | 28(1) | 26(1) | 30(1) | 3(1)  | 12(1) | -4(1) |
| C(21) | 17(1) | 18(1) | 18(1) | -4(1) | 3(1)  | 1(1)  |
| C(22) | 22(1) | 34(1) | 26(1) | 6(1)  | -5(1) | 2(1)  |
| C(23) | 46(1) | 43(1) | 38(1) | 10(1) | 2(1)  | 23(1) |
| C(24) | 15(1) | 18(1) | 18(1) | 0(1)  | 1(1)  | -4(1) |
| C(25) | 24(1) | 27(1) | 17(1) | -6(1) | 2(1)  | -1(1) |
| C(26) | 35(1) | 30(1) | 19(1) | -2(1) | 1(1)  | -1(1) |
| C(27) | 36(1) | 28(1) | 24(1) | -6(1) | 9(1)  | 2(1)  |

Table 5. Hydrogen coordinates ( $\times 10^4$ ) and isotropic displacement parameters ( $\text{\AA}^2 \times 10^3$ ) for mo\_20170104A\_0m.

|        | x     | y     | z     | U(eq) |
|--------|-------|-------|-------|-------|
| H(2A)  | 1064  | 7411  | 9374  | 22    |
| H(2)   | 2151  | 9825  | 6707  | 31    |
| H(3)   | 901   | 11228 | 6243  | 34    |
| H(4)   | -146  | 12353 | 6979  | 32    |
| H(5)   | 60    | 12128 | 8208  | 27    |
| H(12)  | 792   | 11439 | 9613  | 21    |
| H(14)  | 5624  | 8772  | 9281  | 29    |
| H(15)  | 7022  | 7337  | 9222  | 35    |
| H(16)  | 5988  | 5757  | 9341  | 32    |
| H(17)  | 3583  | 5622  | 9531  | 27    |
| H(20A) | -802  | 5367  | 10625 | 41    |
| H(20B) | -1904 | 6244  | 10705 | 41    |
| H(20C) | -442  | 6223  | 11190 | 41    |
| H(22A) | 4260  | 8199  | 11936 | 33    |
| H(22B) | 5776  | 8696  | 11884 | 33    |
| H(23A) | 4756  | 6956  | 11148 | 63    |
| H(23B) | 6063  | 7001  | 11737 | 63    |
| H(23C) | 6187  | 7494  | 10986 | 63    |
| H(25A) | 902   | 10676 | 12222 | 27    |
| H(25B) | 2252  | 11388 | 12209 | 27    |
| H(26A) | 2428  | 9340  | 12620 | 42    |
| H(26B) | 2605  | 10240 | 13163 | 42    |
| H(26C) | 3760  | 10063 | 12621 | 42    |
| H(27A) | 4207  | 8612  | 7840  | 43    |
| H(27B) | 2780  | 8429  | 7346  | 43    |
| H(27C) | 3007  | 7909  | 8099  | 43    |

Table 6. Torsion angles [deg] for mo\_20170104A\_0m.

---

|                         |             |
|-------------------------|-------------|
| C(8)-N(1)-C(1)-C(2)     | 178.63(13)  |
| C(27)-N(1)-C(1)-C(2)    | -3.5(2)     |
| C(8)-N(1)-C(1)-C(6)     | -1.48(14)   |
| C(27)-N(1)-C(1)-C(6)    | 176.39(12)  |
| N(1)-C(1)-C(2)-C(3)     | 179.10(13)  |
| C(6)-C(1)-C(2)-C(3)     | -0.78(19)   |
| C(1)-C(2)-C(3)-C(4)     | -0.5(2)     |
| C(2)-C(3)-C(4)-C(5)     | 0.8(2)      |
| C(3)-C(4)-C(5)-C(6)     | 0.2(2)      |
| C(4)-C(5)-C(6)-C(1)     | -1.43(18)   |
| C(4)-C(5)-C(6)-C(7)     | 179.12(13)  |
| C(2)-C(1)-C(6)-C(5)     | 1.75(19)    |
| N(1)-C(1)-C(6)-C(5)     | -178.15(11) |
| C(2)-C(1)-C(6)-C(7)     | -178.66(12) |
| N(1)-C(1)-C(6)-C(7)     | 1.44(14)    |
| C(5)-C(6)-C(7)-C(12)    | -0.2(2)     |
| C(1)-C(6)-C(7)-C(12)    | -179.69(13) |
| C(5)-C(6)-C(7)-C(8)     | 178.64(14)  |
| C(1)-C(6)-C(7)-C(8)     | -0.87(13)   |
| C(1)-N(1)-C(8)-C(9)     | 179.91(12)  |
| C(27)-N(1)-C(8)-C(9)    | 2.2(2)      |
| C(1)-N(1)-C(8)-C(7)     | 0.91(14)    |
| C(27)-N(1)-C(8)-C(7)    | -176.78(12) |
| C(12)-C(7)-C(8)-N(1)    | 178.98(11)  |
| C(6)-C(7)-C(8)-N(1)     | -0.02(14)   |
| C(12)-C(7)-C(8)-C(9)    | -0.13(18)   |
| C(6)-C(7)-C(8)-C(9)     | -179.13(11) |
| N(1)-C(8)-C(9)-C(10)    | -178.05(12) |
| C(7)-C(8)-C(9)-C(10)    | 0.85(17)    |
| N(1)-C(8)-C(9)-C(13)    | 2.7(2)      |
| C(7)-C(8)-C(9)-C(13)    | -178.36(11) |
| C(8)-C(9)-C(10)-C(11)   | -1.18(18)   |
| C(13)-C(9)-C(10)-C(11)  | 178.04(11)  |
| C(8)-C(9)-C(10)-C(21)   | 176.79(11)  |
| C(13)-C(9)-C(10)-C(21)  | -4.00(17)   |
| C(9)-C(10)-C(11)-C(12)  | 0.79(18)    |
| C(21)-C(10)-C(11)-C(12) | -177.06(11) |
| C(9)-C(10)-C(11)-C(24)  | -178.18(11) |
| C(21)-C(10)-C(11)-C(24) | 3.97(18)    |
| C(8)-C(7)-C(12)-C(11)   | -0.29(18)   |
| C(6)-C(7)-C(12)-C(11)   | 178.40(12)  |
| C(10)-C(11)-C(12)-C(7)  | -0.02(18)   |
| C(24)-C(11)-C(12)-C(7)  | 179.01(11)  |
| C(10)-C(9)-C(13)-C(14)  | -103.00(15) |
| C(8)-C(9)-C(13)-C(14)   | 76.17(16)   |
| C(10)-C(9)-C(13)-C(18)  | 76.83(16)   |
| C(8)-C(9)-C(13)-C(18)   | -103.99(15) |
| C(18)-C(13)-C(14)-C(15) | 0.3(2)      |
| C(9)-C(13)-C(14)-C(15)  | -179.83(13) |

|                         |             |
|-------------------------|-------------|
| C(13)-C(14)-C(15)-C(16) | 0.5(2)      |
| C(14)-C(15)-C(16)-C(17) | -0.5(2)     |
| C(15)-C(16)-C(17)-C(18) | -0.4(2)     |
| C(16)-C(17)-C(18)-C(13) | 1.2(2)      |
| C(16)-C(17)-C(18)-N(2)  | 178.95(12)  |
| C(14)-C(13)-C(18)-C(17) | -1.16(19)   |
| C(9)-C(13)-C(18)-C(17)  | 179.00(12)  |
| C(14)-C(13)-C(18)-N(2)  | -178.96(12) |
| C(9)-C(13)-C(18)-N(2)   | 1.20(18)    |
| C(19)-N(2)-C(18)-C(17)  | 47.00(18)   |
| C(19)-N(2)-C(18)-C(13)  | -135.24(13) |
| C(20)-O(2)-C(19)-O(1)   | 3.02(19)    |
| C(20)-O(2)-C(19)-N(2)   | -178.71(11) |
| C(18)-N(2)-C(19)-O(1)   | -11.6(2)    |
| C(18)-N(2)-C(19)-O(2)   | 170.14(11)  |
| C(22)-O(4)-C(21)-O(3)   | 1.79(19)    |
| C(22)-O(4)-C(21)-C(10)  | -175.69(11) |
| C(9)-C(10)-C(21)-O(3)   | -93.96(15)  |
| C(11)-C(10)-C(21)-O(3)  | 84.00(16)   |
| C(9)-C(10)-C(21)-O(4)   | 83.55(13)   |
| C(11)-C(10)-C(21)-O(4)  | -98.48(13)  |
| C(21)-O(4)-C(22)-C(23)  | 85.27(15)   |
| C(25)-O(5)-C(24)-O(6)   | 1.51(18)    |
| C(25)-O(5)-C(24)-C(11)  | 179.56(10)  |
| C(12)-C(11)-C(24)-O(6)  | 11.29(18)   |
| C(10)-C(11)-C(24)-O(6)  | -169.71(12) |
| C(12)-C(11)-C(24)-O(5)  | -166.72(10) |
| C(10)-C(11)-C(24)-O(5)  | 12.27(17)   |
| C(24)-O(5)-C(25)-C(26)  | 174.71(11)  |

---

Symmetry transformations used to generate equivalent atoms:

Table 7. Hydrogen bonds for mo\_20170104A\_0m [A and deg.].

---

| D-H...A             | d(D-H) | d(H...A) | d(D...A)   | <(DHA) |
|---------------------|--------|----------|------------|--------|
| N(2)-H(2A)...O(6)#1 | 0.86   | 2.21     | 3.0311(14) | 160.3  |

---

Symmetry transformations used to generate equivalent atoms:

#1 -x,-y+2,-z+2
